# Supplementary material for: High-Pressure Limit and Pressure-Dependent Rate Rules for β-Scission Reaction Class of Hydroperoxyl Alkyl Hydroperoxyl Radicals (•P(OOH)2) in Normal-Alkyl Cyclohexanes Combustion
Source: MDPI journal article supplement (doi:10.3390/molecules29020544), 2024-01-22
Supplement: s1 [file s1]

## Supplemental Material-I

### High-pressure Limit and Pressure-dependent Rate Rules for $\beta$ -scission Reaction Class of Hydroperoxyl alkyl hydroperoxyl radicals ( $\bullet P(OOH)_2$ ) in Normal-alkyl Cyclohexanes Combustion

#### Contents:

1. The spin eigenvalues and the  $S^2$  computed by Gaussian 16 package for the species involved in this work
2. The representative IRC profiles for reactions involved in this work
3. Lennard-Jones parameters used in this work
4. Potential energy profiles of internal rotations for reactions involved in this work
5. Cartesian coordinates for all reactants, transition states and products in the class of  $\beta$ -scission reaction

#### 1. The spin eigenvalues and the $S^2$ computed by Gaussian 16 package for the species involved in this work

**Table S1.** Comparison between the spin eigenvalues and the  $S^2$  computed by Gaussian 16 package for the species.

| Species | Spin eigenvalues | $\langle S^2 \rangle$ | Relative error (%) |
|---------|------------------|-----------------------|--------------------|
| R1      | 0.75             | 0.7538                | 0.5                |
| TS1     | 0.75             | 0.7794                | 3.9                |
| R2      | 0.75             | 0.7547                | 0.6                |
| TS2     | 0.75             | 0.7772                | 3.6                |
| R3      | 0.75             | 0.7538                | 0.5                |
| TS3     | 0.75             | 0.7802                | 4.0                |
| R4      | 0.75             | 0.7538                | 0.5                |
| TS4     | 0.75             | 0.7789                | 3.9                |
| R5      | 0.75             | 0.7548                | 0.6                |
| TS5     | 0.75             | 0.7769                | 3.6                |
| R6      | 0.75             | 0.7544                | 0.6                |
| TS6     | 0.75             | 0.7798                | 4.0                |
| R7      | 0.75             | 0.7543                | 0.6                |
| TS7     | 0.75             | 0.7809                | 4.1                |
| R8      | 0.75             | 0.754                 | 0.5                |
| TS8     | 0.75             | 0.7761                | 3.5                |
| R9      | 0.75             | 0.7547                | 0.6                |
| TS9     | 0.75             | 0.7766                | 3.5                |
| R10     | 0.75             | 0.7545                | 0.6                |
| TS10    | 0.75             | 0.7756                | 3.4                |
| R11     | 0.75             | 0.754                 | 0.5                |
| TS11    | 0.75             | 0.7763                | 3.5                |
| R12     | 0.75             | 0.754                 | 0.5                |

|      |      |        |     |
|------|------|--------|-----|
| TS12 | 0.75 | 0.7769 | 3.6 |
| R13  | 0.75 | 0.7546 | 0.6 |
| TS13 | 0.75 | 0.7755 | 3.4 |
| R14  | 0.75 | 0.7541 | 0.5 |
| TS14 | 0.75 | 0.782  | 4.3 |
| R15  | 0.75 | 0.754  | 0.5 |
| TS15 | 0.75 | 0.7826 | 4.3 |
| R16  | 0.75 | 0.754  | 0.5 |
| TS16 | 0.75 | 0.7825 | 4.3 |
| R17  | 0.75 | 0.7543 | 0.6 |
| TS17 | 0.75 | 0.7784 | 3.8 |
| R18  | 0.75 | 0.7543 | 0.6 |
| TS18 | 0.75 | 0.7809 | 4.1 |
| R19  | 0.75 | 0.7544 | 0.6 |
| TS19 | 0.75 | 0.7805 | 4.1 |
| R20  | 0.75 | 0.7544 | 0.6 |
| TS20 | 0.75 | 0.7805 | 4.1 |
| R21  | 0.75 | 0.7541 | 0.5 |
| TS21 | 0.75 | 0.7845 | 4.6 |
| R22  | 0.75 | 0.7542 | 0.6 |
| TS22 | 0.75 | 0.7767 | 3.6 |
| R23  | 0.75 | 0.7545 | 0.6 |
| TS23 | 0.75 | 0.7782 | 3.8 |
| R24  | 0.75 | 0.7543 | 0.6 |
| TS24 | 0.75 | 0.7781 | 3.7 |
| R25  | 0.75 | 0.7542 | 0.6 |
| TS25 | 0.75 | 0.7782 | 3.8 |
| R26  | 0.75 | 0.7544 | 0.6 |
| TS26 | 0.75 | 0.7784 | 3.8 |
| R27  | 0.75 | 0.7541 | 0.5 |
| TS27 | 0.75 | 0.7791 | 3.9 |
| R28  | 0.75 | 0.7542 | 0.6 |
| TS28 | 0.75 | 0.7741 | 3.2 |
| R29  | 0.75 | 0.7542 | 0.6 |
| TS29 | 0.75 | 0.7756 | 3.4 |
| R30  | 0.75 | 0.7544 | 0.6 |
| TS30 | 0.75 | 0.7749 | 3.3 |
| R31  | 0.75 | 0.7541 | 0.5 |
| TS31 | 0.75 | 0.775  | 3.3 |
| R32  | 0.75 | 0.7541 | 0.5 |
| TS32 | 0.75 | 0.7758 | 3.4 |
| R33  | 0.75 | 0.7541 | 0.5 |
| TS33 | 0.75 | 0.7796 | 3.9 |
| R34  | 0.75 | 0.7542 | 0.6 |
| TS34 | 0.75 | 0.7735 | 3.1 |
| R35  | 0.75 | 0.7541 | 0.5 |
| TS35 | 0.75 | 0.7755 | 3.4 |
| R36  | 0.75 | 0.7544 | 0.6 |
| TS36 | 0.75 | 0.7749 | 3.3 |

|      |      |        |     |
|------|------|--------|-----|
| R37  | 0.75 | 0.7541 | 0.5 |
| TS37 | 0.75 | 0.7749 | 3.3 |
| R38  | 0.75 | 0.7541 | 0.5 |
| TS38 | 0.75 | 0.7758 | 3.4 |
| R39  | 0.75 | 0.7541 | 0.5 |
| TS39 | 0.75 | 0.7796 | 3.9 |
| R40  | 0.75 | 0.7542 | 0.6 |
| TS40 | 0.75 | 0.7736 | 3.1 |
| R41  | 0.75 | 0.7541 | 0.5 |
| TS41 | 0.75 | 0.7755 | 3.4 |
| R42  | 0.75 | 0.7544 | 0.6 |
| TS42 | 0.75 | 0.7749 | 3.3 |
| R43  | 0.75 | 0.7541 | 0.5 |
| TS43 | 0.75 | 0.7749 | 3.3 |
| R44  | 0.75 | 0.7541 | 0.5 |
| TS44 | 0.75 | 0.7758 | 3.4 |

## 2. The representative IRC profiles for reactions involved in this work

**Figure S1.** The representative IRC profiles for reactions of R1(a), R5(b), R17(c), and R23(d).

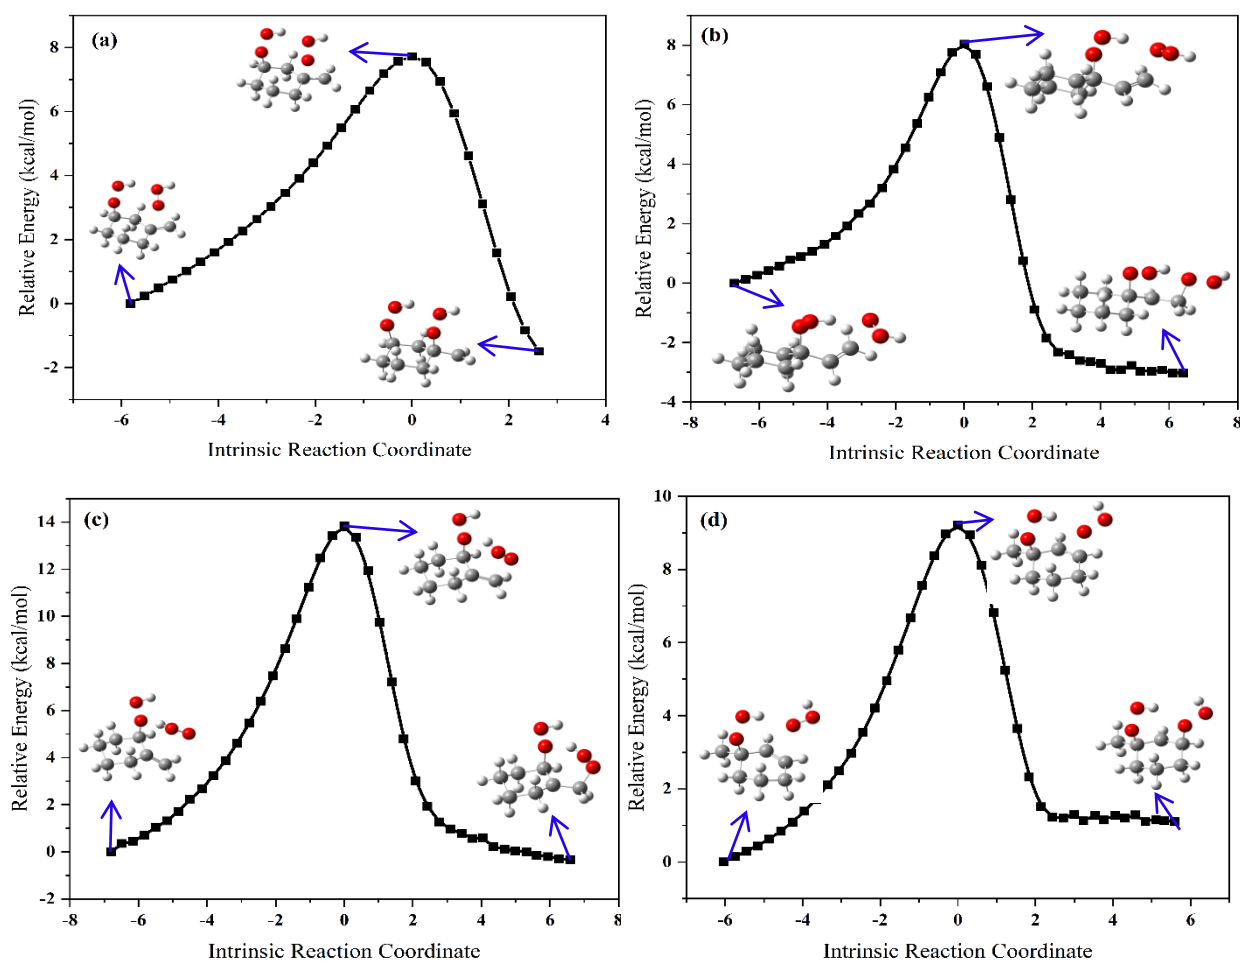

**Table S2.** Lennard-Jones parameters  $\sigma$  (Å) and  $\varepsilon$  (K) used in this work.

| Reactant <sup>a</sup>                  | $\sigma$ | $\varepsilon$ |
|----------------------------------------|----------|---------------|
| C <sub>7</sub> H <sub>11</sub> OOHOOH  | 6.72     | 707.81        |
| C <sub>8</sub> H <sub>13</sub> OOHOOH  | 6.91     | 742.88        |
| C <sub>9</sub> H <sub>15</sub> OOHOOH  | 7.09     | 776.80        |
| C <sub>10</sub> H <sub>17</sub> OOHOOH | 7.26     | 809.67        |
| Ar                                     | 3.47     | 114           |

<sup>a</sup>Represents the reactants in the class of  $\beta$ -scission reaction.

[1] Wang, H.; Frenklach, M. Transport properties of polycyclic aromatic hydrocarbons for flame modeling. *Combust. Flame* **1994**, 96, 163-170.

#### 4. Potential energy profiles of internal rotations for reactions involved in this work

In our study, one-dimensional (1-D) hindered internal rotors are used to treat low-frequency vibrations corresponding to torsions about a single bond for reactants, transition states and products. When dealing with the hindrance potentials of transition states, 1-D hindered rotor scans are implemented by freezing the atoms involved in the reaction centers. Since cyclohexane has a relatively stable cycle structure, the anharmonic correction corresponding to the internal rotations of the single bond on the cycle of the reactants, transition states, and products in this work are all not considered. Here, we only choose the R21 reaction as an example, and the potential energy profiles for internal rotations about C-C, C-OO and CO-OH single bonds of the reactant, the transition state, and the product in R21 are shown in Figure S2(a), Figure S2(b), and Figure S2(c).

**Figure S2(a).** Potential energy profiles for internal rotations of the reactant in R21 at B3LYP/CBSB7 level.

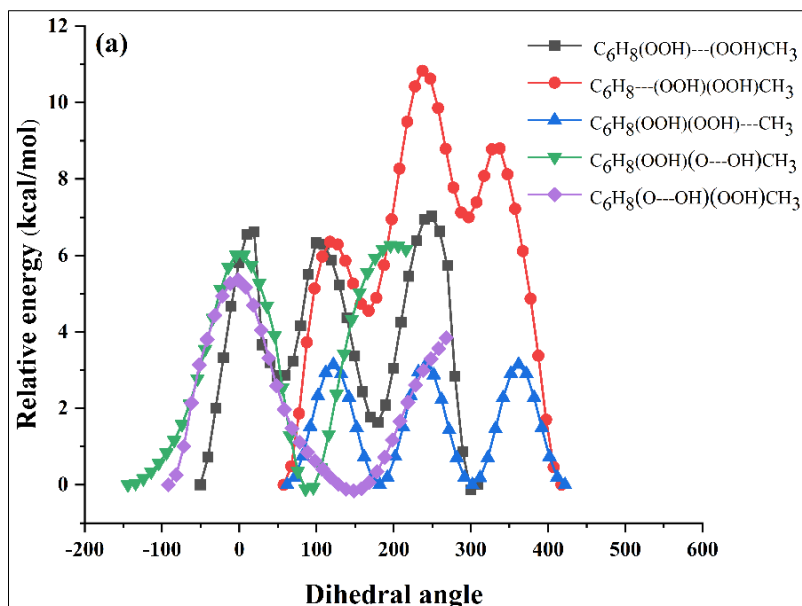

For the reactant, it can be seen from Figure S2(a) that the calculated rotational profile of C<sub>6</sub>H<sub>8</sub>(OOH)---(OOH)CH<sub>3</sub> group in reactant shows an asymmetrical three-fold potential barrier of 7.0 kcal mol<sup>-1</sup>. The rotation of the C<sub>6</sub>H<sub>8</sub>---(OOH)(OOH)CH<sub>3</sub> group shows an asymmetrical three-fold potential barrier of 10.8 kcal mol<sup>-1</sup>. The rotations of the C<sub>6</sub>H<sub>8</sub>(OOH)(OOH)---CH<sub>3</sub> group shows a symmetrical three-fold potential barrier of 3.1 kcal mol<sup>-1</sup>. The rotations of the

$\text{C}_6\text{H}_8(\text{OOH})(\text{O}---\text{OH})\text{CH}_3$  group and the  $\text{C}_6\text{H}_8(\text{O}---\text{OH})(\text{OOH})\text{CH}_3$  group in reactant show asymmetrical two-fold potential barriers of 6.3 and 5.4 kcal mol<sup>-1</sup>, respectively.

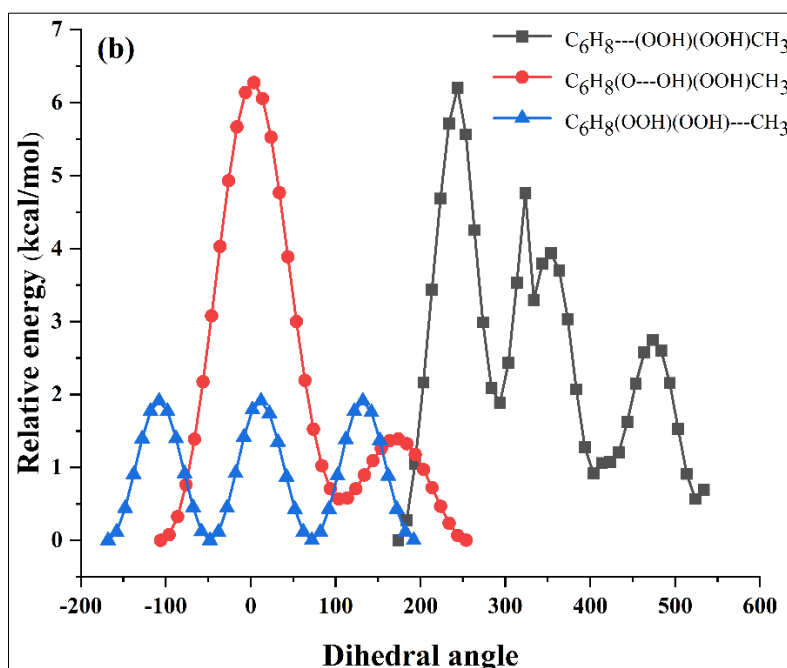

For the transition state, there are only three potential energy profiles for internal rotations about single bonds because the anharmonic correction corresponding to the single bonds involved in the reaction centers are not considered. It can be seen that from Figure S2(b) that, the calculated rotational profile of  $\text{C}_6\text{H}_8---(\text{OOH})(\text{OOH})\text{CH}_3$  group in transition state shows an asymmetrical three-fold potential barriers of 6.2 kcal mol<sup>-1</sup>, and the rotation of  $\text{C}_6\text{H}_8(\text{O}---\text{OH})(\text{OOH})\text{CH}_3$  group in transition state shows an asymmetrical two-fold potential barriers of 6.3 kcal mol<sup>-1</sup>. The rotation of the  $\text{C}_6\text{H}_8(\text{OOH})(\text{OOH})---\text{CH}_3$  group in transition state shows a symmetry three-fold barrier of 1.9 kcal mol<sup>-1</sup>.

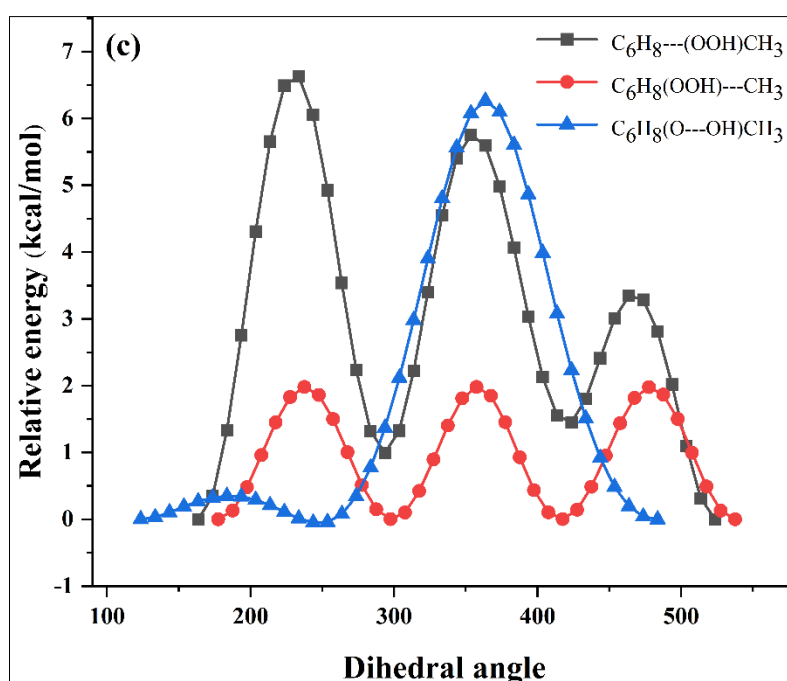

From Figure S2(c), it can be seen that, the calculated rotational profile of C<sub>6</sub>H<sub>8</sub>---(OOH)CH<sub>3</sub> group shows an asymmetrical three-fold with a barrier of 6.6 kcal mol<sup>-1</sup>. The calculated rotational profile of C<sub>6</sub>H<sub>8</sub>(OOH)---CH<sub>3</sub> group shows a symmetrical three-fold with a barrier of 2.0 kcal mol<sup>-1</sup>. The C<sub>6</sub>H<sub>8</sub>(O---OH)CH<sub>3</sub> group in product show an asymmetrical two-fold potential barrier of 6.3 kcal mol<sup>-1</sup>.

## 5. Cartesian coordinates for all reactants, transition states and products in the class of $\beta$ -scission reaction

### HO<sub>2</sub>

|   |             |             |            |
|---|-------------|-------------|------------|
| O | 0.05528900  | -0.60941600 | 0.00000000 |
| H | -0.88463000 | -0.87113300 | 0.00000000 |
| O | 0.05528900  | 0.71830800  | 0.00000000 |

### R1

|   |             |             |             |
|---|-------------|-------------|-------------|
| C | -1.25553900 | 0.55128400  | 0.73206500  |
| C | 0.04495700  | -0.09820000 | 1.21924900  |
| C | 1.21602600  | -0.06664000 | 0.21041200  |
| C | 1.39875700  | 1.36764600  | -0.35461300 |
| C | 0.09357500  | 1.96505500  | -0.89929900 |
| C | -1.02247000 | 1.95074200  | 0.15355900  |
| H | 0.35781700  | 0.43934500  | 2.12097700  |
| H | -0.14065600 | -1.12852600 | 1.52199500  |
| H | -1.96758700 | 0.59443000  | 1.56589300  |
| H | 1.79417700  | 1.99300600  | 0.45350600  |
| H | 2.16233700  | 1.33144300  | -1.13551900 |
| H | 0.27343600  | 2.99336800  | -1.22825900 |
| H | -0.22427200 | 1.39606900  | -1.77485800 |
| H | -0.76027600 | 2.60729900  | 0.99153400  |
| H | -1.95947600 | 2.32827700  | -0.26522600 |
| C | 2.47442000  | -0.57220400 | 0.83292800  |
| H | 3.17743300  | -1.12638900 | 0.22616600  |
| H | 2.72066500  | -0.34581300 | 1.86309600  |
| O | 0.91300800  | -0.82556100 | -0.98168100 |
| O | 0.61343800  | -2.19935100 | -0.62961900 |
| H | -0.35864600 | -2.16580800 | -0.58469200 |
| O | -1.88303400 | -0.16376600 | -0.34490700 |
| O | -2.11595000 | -1.53894800 | 0.10101400  |
| H | -2.99299800 | -1.68179700 | -0.27886400 |

### TS1

|   |             |            |             |
|---|-------------|------------|-------------|
| C | -1.28717300 | 0.60856900 | 0.68577600  |
| C | -0.00492700 | 0.01114400 | 1.28859200  |
| C | 1.26822800  | 0.15861400 | 0.47781100  |
| C | 1.40624400  | 1.41549500 | -0.36066600 |
| C | 0.09656400  | 1.88020100 | -1.01011200 |

|    |             |             |             |
|----|-------------|-------------|-------------|
| C  | -1.03746200 | 1.96295800  | 0.01865500  |
| H  | 0.16741600  | 0.52157400  | 2.24505000  |
| H  | -0.17312000 | -1.03907800 | 1.53338900  |
| H  | -2.02723700 | 0.70757400  | 1.48918600  |
| H  | 1.77774300  | 2.20474600  | 0.30757400  |
| H  | 2.18220800  | 1.25699100  | -1.11493300 |
| H  | 0.25202400  | 2.85796200  | -1.47568300 |
| H  | -0.18577600 | 1.18172100  | -1.79892200 |
| H  | -0.79087600 | 2.69131500  | 0.80076600  |
| H  | -1.96516400 | 2.29698700  | -0.45258100 |
| C  | 2.41883300  | -0.47502500 | 0.92970300  |
| H  | 3.38430200  | -0.25373500 | 0.49091700  |
| H  | 2.36536800  | -1.27669800 | 1.65753000  |
| O  | 0.99829300  | -1.04086400 | -1.04086700 |
| O  | 0.36994300  | -2.23746300 | -0.67223300 |
| H  | 1.07504100  | -2.89572700 | -0.73858800 |
| O  | -1.86799700 | -0.18881600 | -0.34997700 |
| O  | -2.21762300 | -1.48462700 | 0.19389800  |
| H  | -1.48470700 | -2.01120600 | -0.16882600 |
| P1 |             |             |             |
| C  | -0.86953700 | -0.21158200 | 0.76095800  |
| C  | 0.49990600  | -0.84996000 | 1.04327100  |
| C  | 1.55900900  | -0.42688600 | 0.05008300  |
| C  | 1.65808700  | 1.06591100  | -0.15744800 |
| C  | 0.28380900  | 1.66874200  | -0.50694100 |
| C  | -0.77029300 | 1.30198100  | 0.54549900  |
| H  | 0.79713700  | -0.52645300 | 2.04974700  |
| H  | 0.39475000  | -1.93661200 | 1.06619900  |
| H  | -1.55835400 | -0.43468000 | 1.58324300  |
| H  | 2.01889600  | 1.53458500  | 0.76980200  |
| H  | 2.39034000  | 1.29408300  | -0.93621900 |
| H  | 0.36192000  | 2.75656900  | -0.59584700 |
| H  | -0.03047400 | 1.28954800  | -1.48479100 |
| H  | -0.51650100 | 1.76720600  | 1.50614200  |
| H  | -1.75561900 | 1.68142700  | 0.26461200  |
| C  | 2.32758400  | -1.30350700 | -0.59323400 |
| H  | 3.08772900  | -0.98145000 | -1.29741600 |
| H  | 2.22355100  | -2.37211600 | -0.43786200 |
| O  | -1.35121100 | -0.89322100 | -0.40752800 |
| O  | -2.75110400 | -0.52778000 | -0.57581400 |
| H  | -2.72623400 | -0.17228900 | -1.47400000 |
| R2 |             |             |             |
| C  | 1.38338500  | -1.00094000 | -0.17488800 |

|     |             |             |             |
|-----|-------------|-------------|-------------|
| C   | 1.84891500  | -2.40802200 | -0.11500000 |
| H   | 1.33908700  | -3.14415700 | 0.49428600  |
| H   | 2.79811400  | -2.67846300 | -0.56023200 |
| O   | 2.32382400  | -0.25448400 | 0.67917200  |
| O   | 2.65898100  | 1.01776600  | 0.04468500  |
| H   | 3.60736100  | 0.89784500  | -0.09433100 |
| H   | 1.50217300  | -0.58115200 | -1.17731300 |
| C   | -0.06365000 | -0.80471400 | 0.30630200  |
| C   | -0.40615700 | 0.68180900  | 0.49828900  |
| C   | -1.07278800 | -1.48675600 | -0.63899800 |
| H   | -0.14656200 | -1.26956400 | 1.29850300  |
| C   | -1.85177800 | 0.89854700  | 0.95007900  |
| H   | 0.28858700  | 1.11591300  | 1.21889000  |
| C   | -2.51901300 | -1.27869700 | -0.16323400 |
| H   | -0.95621800 | -1.06572300 | -1.64421900 |
| H   | -0.85180100 | -2.55575000 | -0.71759400 |
| C   | -2.84829900 | 0.21084600  | 0.00780200  |
| H   | -2.03835300 | 1.97464900  | 1.00055500  |
| H   | -1.96282800 | 0.50433200  | 1.96856000  |
| H   | -3.21102100 | -1.74068300 | -0.87437300 |
| H   | -2.66314500 | -1.79738700 | 0.79391800  |
| H   | -3.86855700 | 0.33399800  | 0.38388600  |
| H   | -2.80706600 | 0.70516000  | -0.96832900 |
| O   | -0.17097000 | 1.31751300  | -0.77590500 |
| O   | 0.30037900  | 2.66289700  | -0.53782900 |
| H   | 1.24882400  | 2.47901100  | -0.42530400 |
| TS2 |             |             |             |
| C   | -1.16253500 | 1.22188300  | -0.26714700 |
| C   | -1.73924500 | 2.46408800  | -0.05709600 |
| H   | -1.41384500 | 3.10625900  | 0.75424000  |
| H   | -2.59886000 | 2.78561500  | -0.63184100 |
| O   | -2.38310900 | 0.15328700  | 0.77642500  |
| O   | -2.92394800 | -0.84751300 | -0.04985700 |
| H   | -3.84884600 | -0.58276500 | -0.15116800 |
| H   | -1.42188900 | 0.68996500  | -1.17535100 |
| C   | 0.19729600  | 0.86879800  | 0.29489200  |
| C   | 0.38054400  | -0.65058400 | 0.49015300  |
| C   | 1.30241000  | 1.44860000  | -0.62447800 |
| H   | 0.29985300  | 1.33050600  | 1.28536300  |
| C   | 1.79456700  | -1.02807100 | 0.93477700  |
| H   | -0.35394400 | -0.99878500 | 1.21416000  |
| C   | 2.70868100  | 1.07136400  | -0.13657400 |
| H   | 1.15486200  | 1.06358800  | -1.63973300 |
| H   | 1.19500100  | 2.53614400  | -0.67970400 |



|    |             |             |             |
|----|-------------|-------------|-------------|
| C  | 2.86619200  | -0.44799700 | 0.00437500  |
| H  | 1.85736800  | -2.11884400 | 0.97636300  |
| H  | 1.94774000  | -0.65935300 | 1.95760900  |
| H  | 3.45498300  | 1.46966700  | -0.83128100 |
| H  | 2.89780200  | 1.55058300  | 0.83322900  |
| H  | 3.86454100  | -0.69487000 | 0.37836600  |
| H  | 2.77036500  | -0.91641600 | -0.98083800 |
| O  | 0.06277400  | -1.25950800 | -0.77895700 |
| O  | -0.55633700 | -2.54394400 | -0.53155000 |
| H  | -1.48762400 | -2.26835500 | -0.47131000 |
| P2 |             |             |             |
| C  | -1.36640000 | 0.71591000  | 0.94894800  |
| C  | 0.12178100  | 0.53903300  | 0.62308500  |
| C  | 0.47796400  | -0.94661100 | 0.43089800  |
| C  | -0.41937000 | -1.59522900 | -0.64998300 |
| C  | -1.90954100 | -1.41285800 | -0.32699400 |
| C  | -2.26683100 | 0.06425900  | -0.11058000 |
| H  | 0.74282800  | 0.96683100  | 1.41762400  |
| H  | -1.55812100 | 0.26996100  | 1.93236700  |
| H  | -1.58092400 | 1.78322300  | 1.04267500  |
| H  | -0.18542400 | -1.14587300 | -1.62007300 |
| H  | -0.17766100 | -2.66018000 | -0.72839000 |
| H  | -2.52077800 | -1.83526100 | -1.13088200 |
| H  | -2.15311000 | -1.98080100 | 0.58069300  |
| H  | -2.15221400 | 0.60194600  | -1.05846000 |
| H  | -3.31711300 | 0.16355900  | 0.18071600  |
| H  | 0.20162200  | -1.41762500 | 1.38689300  |
| C  | 1.93879500  | -1.26215200 | 0.21587700  |
| H  | 2.16292000  | -2.32738900 | 0.26968200  |
| C  | 2.93891800  | -0.41698800 | -0.01571000 |
| H  | 3.95297100  | -0.78281100 | -0.13572100 |
| H  | 2.78451100  | 0.65042800  | -0.10921000 |
| O  | 0.46504800  | 1.20176700  | -0.60608100 |
| O  | 0.40403700  | 2.63617200  | -0.35614700 |
| H  | -0.24409400 | 2.89829500  | -1.02334000 |
| R3 |             |             |             |
| C  | 1.98138900  | -0.71325200 | 0.08203400  |
| C  | 2.96174800  | -1.70560100 | 0.59651400  |
| H  | 3.48444600  | -1.50736100 | 1.52587300  |
| H  | 3.08682600  | -2.67020500 | 0.12213000  |
| O  | 2.57051700  | 0.61980100  | 0.07782200  |
| O  | 3.54811500  | 0.68815500  | -0.98645300 |
| H  | 4.36333200  | 0.49064800  | -0.50301300 |

|     |             |             |             |
|-----|-------------|-------------|-------------|
| H   | 1.69555100  | -0.93926600 | -0.94705400 |
| C   | 0.73038000  | -0.56758500 | 0.97747000  |
| H   | 0.53227500  | -1.52493400 | 1.46643200  |
| H   | 0.97798400  | 0.14023700  | 1.77483300  |
| C   | -0.55983000 | -0.11655000 | 0.25132600  |
| C   | -1.14316100 | -1.24541700 | -0.62352700 |
| C   | -1.60244900 | 0.36462400  | 1.27728700  |
| C   | -2.48586200 | -0.87138200 | -1.26852400 |
| H   | -1.27704800 | -2.12307600 | 0.01984200  |
| H   | -0.41943300 | -1.52187900 | -1.39611000 |
| C   | -2.93973500 | 0.74057300  | 0.62642800  |
| H   | -1.75547600 | -0.43705100 | 2.01095900  |
| H   | -1.18712900 | 1.22032400  | 1.81335700  |
| C   | -3.50356800 | -0.40891200 | -0.21821400 |
| H   | -2.87273500 | -1.73267300 | -1.82286000 |
| H   | -2.32191700 | -0.07086600 | -1.99550300 |
| H   | -3.65471000 | 1.02985400  | 1.40327600  |
| H   | -2.78740300 | 1.61881200  | -0.00837400 |
| H   | -4.43358500 | -0.10026400 | -0.70608300 |
| H   | -3.75986800 | -1.25241100 | 0.43740600  |
| O   | -0.27575700 | 0.91608900  | -0.71359600 |
| O   | 0.22161500  | 2.10061200  | -0.04135000 |
| H   | 1.17949000  | 1.92386100  | -0.09125300 |
| TS3 |             |             |             |
| C   | 1.83340000  | 1.06363500  | -0.12578500 |
| C   | 2.83352700  | 1.93227900  | 0.29767700  |
| H   | 3.45075100  | 2.45975600  | -0.41899500 |
| H   | 3.08740500  | 2.02894300  | 1.34791000  |
| O   | 2.84304400  | -0.47591700 | -0.64788900 |
| O   | 3.29346700  | -1.18951300 | 0.47239900  |
| H   | 4.21760300  | -0.91072400 | 0.54472800  |
| C   | 0.81682500  | 0.49497700  | 0.83683800  |
| H   | 1.25021000  | -0.38919600 | 1.31426500  |
| H   | 0.62923500  | 1.21385900  | 1.64067400  |
| C   | -0.53384400 | 0.12109800  | 0.18457900  |
| C   | -1.37766400 | -0.73519400 | 1.14431400  |
| C   | -1.31735500 | 1.37346900  | -0.25882600 |
| C   | -2.76401500 | -1.06443500 | 0.57631900  |
| H   | -1.48116300 | -0.18635900 | 2.08908800  |
| H   | -0.82705100 | -1.65276000 | 1.36047900  |
| C   | -2.70782300 | 1.04372400  | -0.82064100 |
| H   | -1.41949700 | 2.02247100  | 0.61906800  |
| H   | -0.73211600 | 1.92954400  | -0.99775700 |
| C   | -3.52632900 | 0.20241100  | 0.16700000  |

|    |             |             |             |
|----|-------------|-------------|-------------|
| H  | -3.33684300 | -1.63166800 | 1.31691800  |
| H  | -2.64160800 | -1.71392400 | -0.29591500 |
| H  | -3.23334800 | 1.97472100  | -1.05724300 |
| H  | -2.59260700 | 0.49417400  | -1.75935300 |
| H  | -4.49232700 | -0.06225400 | -0.27472800 |
| H  | -3.74563400 | 0.80152200  | 1.06144600  |
| H  | 1.51413900  | 1.14693000  | -1.15924600 |
| O  | -0.31168600 | -0.57325300 | -1.06217100 |
| O  | 0.36486300  | -1.83220700 | -0.81533900 |
| H  | 1.29500600  | -1.54971300 | -0.91618700 |
| P3 |             |             |             |
| C  | -1.63329900 | -1.39536900 | -0.92924000 |
| C  | -0.20626200 | -1.27145000 | -0.37568700 |
| C  | 0.11224300  | 0.12635000  | 0.18626800  |
| C  | -0.97366200 | 0.57780600  | 1.17864400  |
| C  | -2.39376300 | 0.46301800  | 0.60801300  |
| C  | -2.68287500 | -0.95487000 | 0.09894000  |
| H  | -0.06181100 | -1.98659800 | 0.44281700  |
| H  | 0.52958900  | -1.52237500 | -1.14308800 |
| H  | -1.72444900 | -0.77881900 | -1.82898800 |
| H  | -1.81322400 | -2.43036400 | -1.23698600 |
| H  | -0.89004700 | -0.04628900 | 2.07606700  |
| H  | -0.76117300 | 1.60363200  | 1.49041100  |
| H  | -3.12123900 | 0.75148800  | 1.37339900  |
| H  | -2.51432600 | 1.17169100  | -0.21989000 |
| H  | -2.67675700 | -1.65100900 | 0.94829900  |
| H  | -3.68555800 | -1.00475600 | -0.33740800 |
| C  | 1.51125300  | 0.18800700  | 0.83828100  |
| H  | 1.65307700  | 1.21410300  | 1.19527700  |
| H  | 1.51667000  | -0.46362500 | 1.71798100  |
| C  | 2.64429500  | -0.17109800 | -0.08032200 |
| H  | 2.70260800  | 0.40885300  | -0.99778800 |
| C  | 3.55560300  | -1.10928000 | 0.16154300  |
| H  | 3.53167600  | -1.70956800 | 1.06675600  |
| H  | 4.36433100  | -1.30862300 | -0.53286600 |
| O  | 0.09092100  | 0.95223900  | -1.00780500 |
| O  | 0.38517100  | 2.33321100  | -0.65038600 |
| H  | -0.45930000 | 2.74996300  | -0.86710300 |
| R4 |             |             |             |
| C  | 2.50144500  | 0.79160900  | 0.30757000  |
| C  | 3.21232900  | 2.09355000  | 0.18769700  |
| H  | 3.34172900  | 2.54144900  | -0.79151800 |
| H  | 3.56207000  | 2.63060600  | 1.05910400  |

|     |             |             |             |
|-----|-------------|-------------|-------------|
| O   | 3.14458700  | -0.21218100 | -0.53010900 |
| O   | 4.45808700  | -0.48569400 | 0.02713000  |
| H   | 5.02016500  | 0.02909000  | -0.56879400 |
| H   | 2.52736500  | 0.42477300  | 1.33749400  |
| C   | 1.04496600  | 0.87832500  | -0.19501800 |
| H   | 0.64951900  | 1.81636400  | 0.20174700  |
| H   | 1.06118700  | 0.97487100  | -1.28642400 |
| C   | 0.08955800  | -0.26024500 | 0.20609500  |
| H   | 0.10571500  | -0.39327300 | 1.29481900  |
| C   | -1.36768200 | -0.03206600 | -0.25663000 |
| C   | -2.27175300 | -1.18563600 | 0.22495900  |
| C   | -1.95028500 | 1.32083500  | 0.20005200  |
| H   | -1.35850000 | -0.04391800 | -1.35607300 |
| C   | -3.72734300 | -1.01091000 | -0.22598500 |
| H   | -2.23731100 | -1.22132000 | 1.32271500  |
| H   | -1.86961800 | -2.13471500 | -0.13063000 |
| C   | -3.41336700 | 1.49550200  | -0.23828100 |
| H   | -1.88958400 | 1.38527400  | 1.29537300  |
| H   | -1.36397800 | 2.15405100  | -0.19655900 |
| C   | -4.30097600 | 0.33615700  | 0.22955000  |
| H   | -4.33613300 | -1.83461300 | 0.16036800  |
| H   | -3.77835400 | -1.07508000 | -1.32072200 |
| H   | -3.79838700 | 2.44833700  | 0.13946700  |
| H   | -3.45121400 | 1.55783400  | -1.33354100 |
| H   | -5.32133700 | 0.46659000  | -0.14537000 |
| H   | -4.36643400 | 0.34924700  | 1.32536500  |
| O   | 0.46747500  | -1.50718700 | -0.38864900 |
| O   | 1.47023000  | -2.14887400 | 0.43440300  |
| H   | 2.27871600  | -1.80680200 | 0.01093400  |
| TS4 |             |             |             |
| C   | -2.49283800 | 0.75491300  | -0.71968000 |
| C   | -3.35950900 | 1.82727600  | -0.86218000 |
| H   | -3.12839700 | 2.79592000  | -0.43256700 |
| H   | -4.33342900 | 1.69945200  | -1.31837700 |
| O   | -3.17378600 | -0.08870000 | 0.87265200  |
| O   | -4.39850300 | -0.71992400 | 0.62443100  |
| H   | -5.03331700 | -0.11864300 | 1.03955700  |
| H   | -2.68125700 | -0.12701500 | -1.32151500 |
| C   | -1.06650800 | 0.97358500  | -0.25477700 |
| C   | -0.07296900 | -0.16575500 | -0.54744000 |
| H   | -1.07770800 | 1.17389800  | 0.82172200  |
| H   | -0.24085400 | -0.54323400 | -1.56416500 |
| C   | 1.40195000  | 0.27334000  | -0.43348300 |
| C   | 1.80936500  | 0.69816400  | 0.99226200  |

|    |             |             |             |
|----|-------------|-------------|-------------|
| C  | 2.34753800  | -0.82108800 | -0.96367300 |
| H  | 1.50589100  | 1.14989100  | -1.08973400 |
| C  | 3.28349300  | 1.12459700  | 1.05895000  |
| H  | 1.63897700  | -0.14272500 | 1.67264000  |
| H  | 1.17521000  | 1.51832500  | 1.34360400  |
| C  | 3.82020500  | -0.39445600 | -0.89246600 |
| H  | 2.19527600  | -1.73073200 | -0.37431800 |
| H  | 2.07854000  | -1.06945700 | -1.99652100 |
| C  | 4.21653200  | 0.02848800  | 0.52821600  |
| H  | 3.54809000  | 1.38285300  | 2.08948100  |
| H  | 3.42483900  | 2.03695700  | 0.46404300  |
| H  | 4.46123100  | -1.21167000 | -1.23852700 |
| H  | 3.99069200  | 0.44579900  | -1.57886300 |
| H  | 5.25582700  | 0.37259400  | 0.54713400  |
| H  | 4.16252800  | -0.84341700 | 1.19242900  |
| H  | -0.69348600 | 1.88400000  | -0.73699800 |
| O  | -0.22510500 | -1.26555800 | 0.35352300  |
| O  | -1.38877800 | -2.03662400 | -0.03038300 |
| H  | -2.08282500 | -1.58072600 | 0.48481300  |
| P4 |             |             |             |
| C  | 2.68153100  | -1.18741300 | -0.84388500 |
| C  | 1.23800300  | -0.69250600 | -1.01985600 |
| C  | 0.61725500  | -0.26176300 | 0.32441700  |
| C  | 1.50733800  | 0.78413000  | 1.02258600  |
| C  | 2.94977300  | 0.28796600  | 1.19563800  |
| C  | 3.56090800  | -0.14271200 | -0.14434000 |
| H  | 1.22303500  | 0.15956000  | -1.70788400 |
| H  | 0.63434900  | -1.47859300 | -1.48284900 |
| H  | 2.67786600  | -2.11085900 | -0.24968700 |
| H  | 3.10512200  | -1.44860700 | -1.81898100 |
| H  | 1.50597300  | 1.70365000  | 0.42745400  |
| H  | 1.07882600  | 1.03885500  | 1.99880900  |
| H  | 3.56028700  | 1.07004100  | 1.65856900  |
| H  | 2.96037300  | -0.56455800 | 1.88748700  |
| H  | 3.66261300  | 0.73629100  | -0.79374800 |
| H  | 4.57088100  | -0.53695700 | 0.00803200  |
| H  | 0.57547900  | -1.14731000 | 0.97434400  |
| C  | -0.84297800 | 0.22480600  | 0.20728000  |
| H  | -1.16778900 | 0.58283600  | 1.19220200  |
| C  | -1.81805600 | -0.86387800 | -0.28867800 |
| H  | -1.66739600 | -0.97273700 | -1.36843900 |
| H  | -1.53627400 | -1.81518800 | 0.17620400  |
| C  | -3.27007600 | -0.59176900 | -0.00391300 |
| H  | -3.68695800 | 0.29860200  | -0.46336600 |

|     |             |             |             |
|-----|-------------|-------------|-------------|
| C   | -4.03982300 | -1.35771700 | 0.76455600  |
| H   | -5.08348200 | -1.12072700 | 0.93919200  |
| H   | -3.65683000 | -2.25383500 | 1.24520400  |
| O   | -0.79484500 | 1.35526500  | -0.67921700 |
| O   | -2.02595500 | 2.11454300  | -0.54623400 |
| H   | -1.69292300 | 2.90620800  | -0.10177100 |
| R5  |             |             |             |
| C   | 0.82846800  | -1.17748600 | 0.45121400  |
| H   | 0.88636200  | -2.22220300 | 0.15991200  |
| C   | 2.09383500  | -0.54154500 | 0.90522400  |
| H   | 1.93419600  | 0.39482000  | 1.44301300  |
| H   | 2.68362900  | -1.22188700 | 1.52808300  |
| O   | 2.86446900  | -0.25061400 | -0.29697300 |
| O   | 4.07174100  | 0.45306000  | 0.12054800  |
| H   | 4.74229800  | -0.19750700 | -0.13020200 |
| O   | -0.14967500 | 0.21055700  | -1.25302300 |
| O   | 0.71222200  | 1.36308500  | -1.10561500 |
| H   | 1.59445000  | 0.94923300  | -1.15357300 |
| C   | -0.40649600 | -0.42163600 | 0.04681700  |
| C   | -1.54299800 | -1.40659500 | -0.28978000 |
| C   | -0.86754100 | 0.61886800  | 1.08217900  |
| C   | -2.85473800 | -0.71056200 | -0.67539100 |
| H   | -1.69811500 | -2.03823600 | 0.59289300  |
| H   | -1.20481200 | -2.06303900 | -1.09768400 |
| C   | -2.17341600 | 1.31456600  | 0.67417800  |
| H   | -1.00457200 | 0.09730100  | 2.03754200  |
| H   | -0.08189300 | 1.36143300  | 1.22480100  |
| C   | -3.29057600 | 0.30348500  | 0.38933600  |
| H   | -3.63273200 | -1.46582200 | -0.82652100 |
| H   | -2.71779800 | -0.19750100 | -1.63145700 |
| H   | -2.47621000 | 2.00467300  | 1.46811300  |
| H   | -1.98803100 | 1.91932800  | -0.21857600 |
| H   | -4.19795700 | 0.82273200  | 0.06511300  |
| H   | -3.54809300 | -0.22659900 | 1.31638800  |
| TS5 |             |             |             |
| C   | -0.89458200 | 0.82950200  | 0.84619900  |
| H   | -4.55484100 | -0.12405900 | 0.65152200  |
| C   | -1.93305100 | 1.40142400  | 0.13666200  |
| H   | -2.70544800 | 1.94094000  | 0.67074600  |
| H   | -1.76715500 | 1.69912200  | -0.89219100 |
| O   | -3.07552400 | -0.01802600 | -0.48077300 |
| O   | -3.74497000 | -0.64979700 | 0.57002300  |
| H   | -0.99282900 | 0.70305100  | 1.92030900  |

|    |             |             |             |
|----|-------------|-------------|-------------|
| C  | 0.35146000  | 0.28031700  | 0.19093400  |
| C  | 1.37293000  | 1.42153200  | -0.05099600 |
| C  | 0.98544700  | -0.84029800 | 1.03837400  |
| C  | 2.70195200  | 0.91094700  | -0.62725000 |
| H  | 1.54496700  | 1.92285100  | 0.90825900  |
| H  | 0.91940400  | 2.15917300  | -0.71934700 |
| C  | 2.30406600  | -1.34638400 | 0.44386900  |
| H  | 1.15888600  | -0.43757400 | 2.04417100  |
| H  | 0.26721500  | -1.65583300 | 1.13082900  |
| C  | 3.30596300  | -0.20337000 | 0.23661800  |
| H  | 3.39976900  | 1.75040800  | -0.71304400 |
| H  | 2.52750100  | 0.53399700  | -1.63878700 |
| H  | 2.72891000  | -2.11049000 | 1.10250600  |
| H  | 2.09588200  | -1.83268500 | -0.51387700 |
| H  | 4.22246000  | -0.58142500 | -0.22712200 |
| H  | 3.59666800  | 0.20802200  | 1.21283600  |
| O  | 0.04952600  | -0.16995800 | -1.14649300 |
| O  | -0.72560600 | -1.39411300 | -1.09794300 |
| H  | -1.63391400 | -1.04237100 | -0.98178900 |
| P5 |             |             |             |
| C  | 1.68741400  | 0.91770500  | -0.99164300 |
| C  | 0.22295100  | 1.23865000  | -0.65599600 |
| C  | -0.50458600 | 0.07019000  | 0.03011100  |
| C  | 0.29744500  | -0.43369000 | 1.24811200  |
| C  | 1.75472000  | -0.76294800 | 0.89837400  |
| C  | 2.45898000  | 0.43093600  | 0.24185800  |
| H  | 0.18565300  | 2.09446200  | 0.02614400  |
| H  | -0.32687900 | 1.52037200  | -1.55823400 |
| H  | 1.71759100  | 0.14702400  | -1.76711900 |
| H  | 2.16289400  | 1.81032100  | -1.41088500 |
| H  | 0.26139800  | 0.35057200  | 2.01311800  |
| H  | -0.20531000 | -1.30953000 | 1.66363200  |
| H  | 2.28530800  | -1.06710500 | 1.80634100  |
| H  | 1.77361700  | -1.61947600 | 0.21748000  |
| H  | 2.53896700  | 1.25055500  | 0.96875600  |
| H  | 3.48249000  | 0.16149100  | -0.03758400 |
| C  | -1.93195400 | 0.37237900  | 0.42730100  |
| H  | -2.48044300 | -0.50266600 | 0.76701800  |
| C  | -2.54116800 | 1.55369200  | 0.41778600  |
| H  | -3.57280800 | 1.65063000  | 0.73790400  |
| H  | -2.04919700 | 2.46602400  | 0.10032500  |
| O  | -0.51236000 | -0.94161800 | -1.02105700 |
| O  | -1.05862800 | -2.18705200 | -0.50325500 |
| H  | -1.86818700 | -2.24479600 | -1.02782100 |

R6

|   |             |             |             |
|---|-------------|-------------|-------------|
| C | 1.20148500  | -0.91920600 | -0.29367900 |
| H | 0.99313200  | -1.36938500 | -1.25992300 |
| C | 2.55076900  | -1.14077400 | 0.28919700  |
| H | 2.58874600  | -0.88288400 | 1.35085300  |
| H | 2.89437400  | -2.17094300 | 0.14931500  |
| O | 3.46325200  | -0.25894900 | -0.42618000 |
| O | 4.77144500  | -0.38259300 | 0.20541000  |
| H | 5.27284800  | -0.78186000 | -0.51919300 |
| C | 0.29886500  | 0.17669200  | 0.17288200  |
| H | 0.35635100  | 0.30242000  | 1.26004700  |
| O | 0.76018600  | 1.42636000  | -0.41817700 |
| O | 1.86397000  | 1.93318200  | 0.36607000  |
| H | 2.61975500  | 1.47171700  | -0.04353000 |
| C | -1.16311500 | 0.01109300  | -0.26498700 |
| C | -1.75366500 | -1.31111400 | 0.26251300  |
| C | -2.03236200 | 1.20140000  | 0.17970400  |
| H | -1.16941700 | -0.02578600 | -1.36398700 |
| C | -3.21954300 | -1.48950400 | -0.16008500 |
| H | -1.68973900 | -1.31448900 | 1.35915300  |
| H | -1.15943500 | -2.16232000 | -0.08478000 |
| C | -3.49667900 | 1.02660000  | -0.24616300 |
| H | -1.98097100 | 1.28511100  | 1.27395000  |
| H | -1.62132000 | 2.12811100  | -0.22344100 |
| C | -4.08402100 | -0.29528600 | 0.26609600  |
| H | -3.61698400 | -2.41780000 | 0.26282600  |
| H | -3.26753700 | -1.59916500 | -1.25118300 |
| H | -4.09154500 | 1.87149900  | 0.11495500  |
| H | -3.55931600 | 1.04988600  | -1.34189700 |
| H | -5.10960400 | -0.42328200 | -0.09499200 |
| H | -4.14056800 | -0.26423700 | 1.36197600  |

TS6

|   |             |             |             |
|---|-------------|-------------|-------------|
| C | 1.25251600  | -0.89672500 | 0.09355100  |
| H | 4.99704500  | -1.11792900 | 0.70152400  |
| C | 2.31945800  | -1.30926500 | -0.68609800 |
| H | 2.86249500  | -2.20560900 | -0.41134500 |
| H | 2.33512100  | -1.05906300 | -1.74148300 |
| O | 3.75233400  | -0.12024900 | -0.27115300 |
| O | 4.33609400  | -0.45527400 | 0.95382600  |
| C | 0.32021200  | 0.21900800  | -0.27928800 |
| H | 0.31213300  | 0.37768700  | -1.36332500 |
| C | -1.11179700 | 0.02474800  | 0.24136300  |
| C | -2.01411000 | 1.21756100  | -0.12244800 |



|    |             |             |             |
|----|-------------|-------------|-------------|
| C  | -1.72231600 | -1.29148600 | -0.27774800 |
| H  | -1.04942400 | -0.03593400 | 1.33751700  |
| C  | -3.44834100 | 1.02051300  | 0.38763400  |
| H  | -2.03012700 | 1.32628200  | -1.21555800 |
| H  | -1.58504400 | 2.13798300  | 0.27654200  |
| C  | -3.15882400 | -1.49094400 | 0.22786900  |
| H  | -1.72352000 | -1.27284900 | -1.37609400 |
| H  | -1.10201200 | -2.14441200 | 0.01645600  |
| C  | -4.05568700 | -0.29473900 | -0.11857900 |
| H  | -4.07033200 | 1.86805500  | 0.08281900  |
| H  | -3.44422100 | 1.01849400  | 1.48535400  |
| H  | -3.57477700 | -2.41296600 | -0.19095200 |
| H  | -3.14017300 | -1.62476700 | 1.31713600  |
| H  | -5.05674800 | -0.43957300 | 0.30029200  |
| H  | -4.17824500 | -0.23973900 | -1.20812800 |
| H  | 1.18890300  | -1.25134000 | 1.11896400  |
| O  | 0.81458300  | 1.43236100  | 0.33238200  |
| O  | 1.88750000  | 1.95261500  | -0.48187400 |
| H  | 2.64817600  | 1.40801500  | -0.19272300 |
| P6 |             |             |             |
| C  | -2.25544000 | 1.34847300  | -0.49065900 |
| C  | -0.75280700 | 1.04004600  | -0.55878300 |
| C  | -0.32397000 | 0.07578800  | 0.56331400  |
| C  | -1.17215400 | -1.20880100 | 0.53412700  |
| C  | -2.67552900 | -0.90188200 | 0.59419100  |
| C  | -3.09958400 | 0.06701100  | -0.51800400 |
| H  | -0.51671400 | 0.58547700  | -1.52718000 |
| H  | -0.17154800 | 1.96420700  | -0.49884500 |
| H  | -2.47105500 | 1.90258000  | 0.43261300  |
| H  | -2.53764600 | 2.00608800  | -1.31914700 |
| H  | -0.94733000 | -1.75943600 | -0.38601500 |
| H  | -0.88858500 | -1.85935600 | 1.36958500  |
| H  | -3.24921100 | -1.83207300 | 0.52775500  |
| H  | -2.91563700 | -0.45813300 | 1.56938000  |
| H  | -2.97571500 | -0.42493900 | -1.49137600 |
| H  | -4.16315300 | 0.30934000  | -0.42382200 |
| H  | -0.50807700 | 0.57635700  | 1.52493700  |
| C  | 1.19128600  | -0.23723600 | 0.55072900  |
| H  | 1.38272800  | -1.01455700 | 1.30369800  |
| C  | 2.04408000  | 0.96530500  | 0.86837300  |
| H  | 1.88875900  | 1.37560400  | 1.86494200  |
| C  | 2.92971800  | 1.52160300  | 0.05057200  |
| H  | 3.11069300  | 1.11862000  | -0.93841900 |
| H  | 3.50734500  | 2.38751400  | 0.35318700  |

|     |             |             |             |
|-----|-------------|-------------|-------------|
| O   | 1.47365000  | -0.79840000 | -0.73428100 |
| O   | 2.73956500  | -1.51355800 | -0.64724100 |
| H   | 2.43582100  | -2.40347800 | -0.87227400 |
| R7  |             |             |             |
| C   | 2.04040900  | -1.07493400 | 0.56369800  |
| H   | 2.05039200  | -2.12404700 | 0.28315200  |
| C   | 3.32812500  | -0.45683100 | 0.97624200  |
| H   | 3.17955800  | 0.47799200  | 1.52361000  |
| H   | 3.93810400  | -1.14004700 | 1.57570300  |
| O   | 4.05694700  | -0.15425600 | -0.24808000 |
| O   | 5.27387500  | 0.55132600  | 0.13513000  |
| H   | 5.93883200  | -0.09470900 | -0.14116000 |
| C   | 0.84658100  | -0.25876300 | 0.18561400  |
| H   | 0.73565600  | 0.59911600  | 0.85542700  |
| O   | 1.03846500  | 0.28004600  | -1.15372100 |
| O   | 1.88186600  | 1.45093100  | -1.06842400 |
| H   | 2.77070000  | 1.05081600  | -1.10993500 |
| C   | -0.43913900 | -1.08398900 | 0.11235600  |
| H   | -0.54538200 | -1.62838400 | 1.05888300  |
| H   | -0.30198300 | -1.84136700 | -0.66879700 |
| C   | -1.71954100 | -0.28270900 | -0.17510600 |
| C   | -2.88241200 | -1.23184700 | -0.51979200 |
| C   | -2.11894200 | 0.64170400  | 0.99048900  |
| H   | -1.52434400 | 0.34430600  | -1.05326600 |
| C   | -4.18637600 | -0.47544300 | -0.80936400 |
| H   | -3.04348400 | -1.92147200 | 0.32102600  |
| H   | -2.60922100 | -1.85124200 | -1.38125200 |
| C   | -3.42130900 | 1.40430400  | 0.70429700  |
| H   | -2.24732400 | 0.03446500  | 1.89803400  |
| H   | -1.31844200 | 1.35705000  | 1.20313300  |
| C   | -4.57087100 | 0.45119100  | 0.35173900  |
| H   | -4.99470700 | -1.18531800 | -1.01342000 |
| H   | -4.05927100 | 0.12250500  | -1.72082500 |
| H   | -3.69031000 | 2.02131300  | 1.56788000  |
| H   | -3.25532600 | 2.09525200  | -0.13189600 |
| H   | -5.47247900 | 1.01974900  | 0.10152300  |
| H   | -4.81934100 | -0.15645200 | 1.23190700  |
| TS7 |             |             |             |
| C   | -2.10971600 | -1.13781900 | -0.02775000 |
| H   | -5.78891200 | -0.32328600 | -0.48119900 |
| C   | -3.19675400 | -1.15784700 | 0.82932600  |
| H   | -3.98555700 | -1.88310200 | 0.66925600  |
| O   | -4.25924500 | 0.35121000  | 0.35265100  |

|    |             |             |             |
|----|-------------|-------------|-------------|
| O  | -4.98422300 | 0.10134800  | -0.81561300 |
| H  | -3.07273000 | -0.82165400 | 1.85323900  |
| C  | -0.87430200 | -0.31447100 | 0.19971500  |
| H  | -0.74403400 | -0.09767100 | 1.26519100  |
| C  | 0.38111400  | -0.97183100 | -0.38333800 |
| H  | 0.34585800  | -0.86391800 | -1.47468000 |
| H  | 0.30970600  | -2.04671200 | -0.17813200 |
| C  | 1.72737800  | -0.46066000 | 0.15959000  |
| C  | 2.86869100  | -1.39542700 | -0.28703500 |
| C  | 2.04623100  | 0.99379200  | -0.23677700 |
| H  | 1.67807900  | -0.50551100 | 1.25827200  |
| C  | 4.23709400  | -0.94412600 | 0.24223600  |
| H  | 2.89611700  | -1.42009300 | -1.38515600 |
| H  | 2.66012800  | -2.42035200 | 0.04106800  |
| C  | 3.41300400  | 1.44794100  | 0.29593500  |
| H  | 2.04045200  | 1.06618000  | -1.33287500 |
| H  | 1.25885400  | 1.66333000  | 0.11288600  |
| C  | 4.54182800  | 0.50843500  | -0.14731100 |
| H  | 5.02101000  | -1.61192700 | -0.13006000 |
| H  | 4.24679000  | -1.03343500 | 1.33643600  |
| H  | 3.61801200  | 2.47083800  | -0.03593700 |
| H  | 3.38079000  | 1.48011600  | 1.39310500  |
| H  | 5.49596500  | 0.82503500  | 0.28671900  |
| H  | 4.65790600  | 0.57272600  | -1.23712400 |
| H  | -2.21137500 | -1.58859400 | -1.01141600 |
| O  | -1.03939100 | 0.94930000  | -0.48358700 |
| O  | -1.87244800 | 1.80371000  | 0.33061800  |
| H  | -2.77200500 | 1.48555700  | 0.11030900  |
| P7 |             |             |             |
| C  | 2.74750700  | 1.24610900  | 0.63903000  |
| C  | 1.39068300  | 0.62438900  | 1.00253600  |
| C  | 0.81537900  | -0.22573900 | -0.14560100 |
| C  | 1.84052100  | -1.28976300 | -0.58026200 |
| C  | 3.19838700  | -0.67499800 | -0.94756800 |
| C  | 3.75881000  | 0.18031900  | 0.19655200  |
| H  | 1.51141400  | -0.01316700 | 1.89004100  |
| H  | 0.68989700  | 1.41783300  | 1.28082400  |
| H  | 2.60433400  | 1.96842500  | -0.17464400 |
| H  | 3.13945300  | 1.81179500  | 1.49061800  |
| H  | 1.97893300  | -2.00962200 | 0.23885300  |
| H  | 1.44416600  | -1.85806000 | -1.42884500 |
| H  | 3.90793600  | -1.46493500 | -1.21485000 |
| H  | 3.07864000  | -0.04848300 | -1.84069500 |
| H  | 3.99641100  | -0.46851800 | 1.04986300  |

|    |             |             |             |
|----|-------------|-------------|-------------|
| H  | 4.69912100  | 0.65193600  | -0.10699700 |
| H  | 0.63491100  | 0.43667400  | -1.00103700 |
| C  | -0.52451000 | -0.88815900 | 0.21704900  |
| H  | -0.79819000 | -1.61930700 | -0.55186600 |
| H  | -0.42102100 | -1.45054900 | 1.15298500  |
| C  | -1.71166900 | 0.07456300  | 0.36942600  |
| H  | -1.44578700 | 0.90805300  | 1.02809000  |
| C  | -2.93467100 | -0.62213000 | 0.92062800  |
| H  | -2.94147400 | -0.76824700 | 1.99888700  |
| C  | -3.95231300 | -1.06101800 | 0.18525800  |
| H  | -4.80012300 | -1.56588100 | 0.63284300  |
| H  | -3.95843200 | -0.94234000 | -0.89376500 |
| O  | -1.94251400 | 0.61121400  | -0.93868300 |
| O  | -2.73909100 | 1.81203900  | -0.80262500 |
| H  | -3.63609500 | 1.44692000  | -0.76213000 |
| R8 |             |             |             |
| C  | 2.74470700  | 1.04580800  | -0.80238300 |
| C  | 1.32239600  | 1.40057800  | -0.34227000 |
| C  | 0.50928700  | 0.16108100  | 0.12493300  |
| C  | 1.30906400  | -0.63637700 | 1.17693100  |
| C  | 2.72265400  | -0.98974400 | 0.69938900  |
| C  | 3.50541100  | 0.25801900  | 0.27136500  |
| H  | 1.36546900  | 2.09635000  | 0.50284200  |
| H  | 0.77124800  | 1.90173600  | -1.14316000 |
| H  | 2.68672700  | 0.45256300  | -1.71920400 |
| H  | 3.27939100  | 1.96839700  | -1.05100700 |
| H  | 1.36251600  | -0.02882700 | 2.08844200  |
| H  | 0.75256200  | -1.54237400 | 1.42522500  |
| H  | 3.25323900  | -1.51702600 | 1.49845800  |
| H  | 2.64912400  | -1.68298600 | -0.14412400 |
| H  | 3.67313500  | 0.90112200  | 1.14588600  |
| H  | 4.49476500  | -0.02496300 | -0.10124400 |
| C  | -0.83455900 | 0.57582400  | 0.64991600  |
| H  | -0.93043100 | 0.75959300  | 1.71533900  |
| C  | -2.02899800 | 0.79454700  | -0.21776400 |
| O  | 0.37759000  | -0.59524600 | -1.10151300 |
| O  | -0.31138600 | -1.85099400 | -0.84501700 |
| H  | -1.20323300 | -1.60134900 | -1.15123800 |
| O  | -2.65687800 | -0.47368200 | -0.62138700 |
| O  | -3.06531000 | -1.19783000 | 0.56690300  |
| H  | -2.25661100 | -1.69821300 | 0.76474300  |
| C  | -3.07247400 | 1.71716800  | 0.39601500  |
| H  | -2.64012200 | 2.70147300  | 0.59407500  |

|     |             |             |             |
|-----|-------------|-------------|-------------|
| H   | -3.91716400 | 1.83591000  | -0.28501300 |
| H   | -3.43967000 | 1.30014300  | 1.33521700  |
| H   | -1.71799200 | 1.15904100  | -1.20393300 |
| TS8 |             |             |             |
| C   | -0.77660300 | 0.68693700  | 0.62045000  |
| H   | -4.25148300 | -0.81067600 | 0.47628500  |
| C   | -1.84893400 | 1.00571600  | -0.19887800 |
| H   | -1.64471400 | 1.07902300  | -1.26266400 |
| O   | -2.70208900 | -0.70945500 | -0.56196300 |
| O   | -3.37459800 | -1.21413900 | 0.55656000  |
| H   | -0.90526200 | 0.74928600  | 1.69828700  |
| C   | 0.55843000  | 0.19769500  | 0.10840000  |
| C   | 1.43295000  | 1.40171900  | -0.32875500 |
| C   | 1.29322800  | -0.64154900 | 1.17222700  |
| C   | 2.84370700  | 0.97903700  | -0.76524500 |
| H   | 1.49176700  | 2.09549700  | 0.51768300  |
| H   | 0.92008900  | 1.92904900  | -1.13852700 |
| C   | 2.69356200  | -1.06586100 | 0.71716400  |
| H   | 1.36449100  | -0.03350400 | 2.08281600  |
| H   | 0.68457400  | -1.51530700 | 1.40771900  |
| C   | 3.54625600  | 0.14333900  | 0.31218000  |
| H   | 3.42915200  | 1.87471500  | -0.99796400 |
| H   | 2.76853000  | 0.39601400  | -1.68722700 |
| H   | 3.18266000  | -1.62417500 | 1.52172400  |
| H   | 2.59674600  | -1.75013300 | -0.13102000 |
| H   | 4.52537400  | -0.18643800 | -0.04922700 |
| H   | 3.73399600  | 0.76912400  | 1.19535600  |
| O   | 0.38749800  | -0.53548700 | -1.12290700 |
| O   | -0.19766200 | -1.83433900 | -0.85647400 |
| H   | -1.15148800 | -1.60522300 | -0.81193400 |
| C   | -3.02371600 | 1.78928600  | 0.31513900  |
| H   | -3.87939500 | 1.69689600  | -0.35691900 |
| H   | -3.31323100 | 1.45315000  | 1.31383000  |
| H   | -2.77027700 | 2.85215600  | 0.38396200  |
| P8  |             |             |             |
| C   | -1.91615300 | -1.18593200 | -0.96967300 |
| C   | -0.39415000 | -1.14833200 | -0.76313700 |
| C   | 0.08244200  | 0.12312100  | -0.03973600 |
| C   | -0.71208000 | 0.33782000  | 1.26527000  |
| C   | -2.23034400 | 0.30886700  | 1.04631600  |
| C   | -2.67328000 | -0.98335400 | 0.34914600  |
| H   | -0.08833200 | -2.00651700 | -0.15542400 |
| H   | 0.12484600  | -1.22911600 | -1.72229400 |
| H   | -2.20215300 | -0.40240500 | -1.67713700 |

|    |             |             |             |
|----|-------------|-------------|-------------|
| H  | -2.19246500 | -2.14265200 | -1.42481000 |
| H  | -0.41728800 | -0.45346800 | 1.96451900  |
| H  | -0.40684500 | 1.28754600  | 1.70980600  |
| H  | -2.73837900 | 0.41605300  | 2.01016400  |
| H  | -2.51937100 | 1.17088400  | 0.43718400  |
| H  | -2.48446400 | -1.83796100 | 1.01299000  |
| H  | -3.75207600 | -0.96506100 | 0.16407400  |
| C  | 1.56836700  | 0.16901600  | 0.23481500  |
| H  | 1.90229300  | 1.10740600  | 0.67384600  |
| C  | 2.46564300  | -0.79014300 | 0.01644400  |
| H  | 2.14941600  | -1.73794000 | -0.41265900 |
| O  | -0.25736400 | 1.16375100  | -1.00730000 |
| O  | 0.02709100  | 2.47387300  | -0.44450700 |
| H  | 0.78857800  | 2.72777200  | -0.98279500 |
| C  | 3.92997100  | -0.67587000 | 0.32711700  |
| H  | 4.53580800  | -0.82135400 | -0.57430900 |
| H  | 4.17711900  | 0.30042400  | 0.75062400  |
| H  | 4.24299600  | -1.44575400 | 1.04130000  |
| R9 |             |             |             |
| C  | 1.35049800  | -0.27502500 | -0.01906400 |
| C  | 2.31918600  | -1.39021300 | 0.14565600  |
| H  | 2.07725500  | -2.18515200 | 0.84431600  |
| O  | 1.88172800  | 0.81145700  | 0.82734100  |
| O  | 1.68598400  | 2.10465300  | 0.17225800  |
| H  | 2.60114900  | 2.33875800  | -0.03020400 |
| H  | 1.36292900  | 0.11534700  | -1.04114800 |
| C  | -0.08614300 | -0.63730000 | 0.39053000  |
| C  | -0.99298500 | 0.60168300  | 0.46677800  |
| C  | -0.69164900 | -1.70630400 | -0.54138900 |
| H  | -0.04255800 | -1.04767800 | 1.40887700  |
| C  | -2.43238600 | 0.25478600  | 0.85283200  |
| H  | -0.56722000 | 1.31016400  | 1.17897400  |
| C  | -2.12998500 | -2.06067300 | -0.13286400 |
| H  | -0.68883900 | -1.32307500 | -1.56828700 |
| H  | -0.06633000 | -2.60434500 | -0.53829100 |
| C  | -3.02441100 | -0.81453100 | -0.07448800 |
| H  | -3.02663700 | 1.17205100  | 0.82317000  |
| H  | -2.44033300 | -0.10076400 | 1.89138100  |
| H  | -2.54347800 | -2.79137400 | -0.83518800 |
| H  | -2.11660600 | -2.54743700 | 0.85147900  |
| H  | -4.03186300 | -1.08451200 | 0.25686900  |
| H  | -3.12258400 | -0.39195100 | -1.07979600 |
| O  | -0.95174900 | 1.21280500  | -0.84015600 |

|     |             |             |             |
|-----|-------------|-------------|-------------|
| O   | -1.06443900 | 2.64467700  | -0.68046200 |
| H   | -0.13183500 | 2.85480600  | -0.50071200 |
| C   | 3.70210800  | -1.31243900 | -0.40023200 |
| H   | 4.38875300  | -0.82481300 | 0.30837200  |
| H   | 4.11248200  | -2.30655400 | -0.60042800 |
| H   | 3.73812200  | -0.73210300 | -1.32779100 |
| TS9 |             |             |             |
| C   | 1.23040000  | -0.59620100 | -0.08801500 |
| C   | 2.19824100  | -1.53616600 | 0.23326100  |
| H   | 2.01686200  | -2.20032300 | 1.07586900  |
| O   | 1.92846700  | 0.91030800  | 0.91956600  |
| O   | 2.07588100  | 2.01397200  | 0.05385600  |
| H   | 3.03274500  | 2.07951600  | -0.07002300 |
| H   | 1.34359100  | -0.05427300 | -1.02113400 |
| C   | -0.19895400 | -0.73007900 | 0.38989400  |
| C   | -0.92609600 | 0.62827700  | 0.46217100  |
| C   | -0.96604100 | -1.72188000 | -0.52120700 |
| H   | -0.19251400 | -1.13825100 | 1.40879200  |
| C   | -2.40460900 | 0.49406600  | 0.83070900  |
| H   | -0.40688300 | 1.26044500  | 1.18038200  |
| C   | -2.44059100 | -1.85182800 | -0.11207000 |
| H   | -0.90579800 | -1.36868800 | -1.55675900 |
| H   | -0.47349000 | -2.69874800 | -0.49082100 |
| C   | -3.14054800 | -0.48694800 | -0.08946100 |
| H   | -2.85666300 | 1.48868500  | 0.78792800  |
| H   | -2.47485200 | 0.15477500  | 1.87261100  |
| H   | -2.95239700 | -2.53181500 | -0.80059000 |
| H   | -2.50216100 | -2.31115200 | 0.88356300  |
| H   | -4.18108500 | -0.59743600 | 0.23101800  |
| H   | -3.16166100 | -0.07260000 | -1.10290000 |
| O   | -0.77703200 | 1.23304600  | -0.83946000 |
| O   | -0.68220700 | 2.66731000  | -0.67231400 |
| H   | 0.27850800  | 2.75239400  | -0.53935900 |
| C   | 3.54181700  | -1.60809000 | -0.41050100 |
| H   | 4.33478600  | -1.36033700 | 0.30653300  |
| H   | 3.75647200  | -2.62204800 | -0.76865000 |
| H   | 3.62194800  | -0.92414400 | -1.25832600 |
| P9  |             |             |             |
| C   | -1.90937000 | 0.53095000  | 0.92658400  |
| C   | -0.40443100 | 0.57254100  | 0.63385700  |
| C   | 0.16981300  | -0.84567400 | 0.45770200  |
| C   | -0.60006000 | -1.61826300 | -0.63992200 |
| C   | -2.10786700 | -1.65572200 | -0.35130300 |
| C   | -2.68197800 | -0.24654600 | -0.14889900 |

|   |             |             |             |
|---|-------------|-------------|-------------|
| H | 0.12950100  | 1.08873600  | 1.43914400  |
| H | -2.05537800 | 0.06298400  | 1.90756600  |
| H | -2.27966000 | 1.55557300  | 1.01132500  |
| H | -0.41216500 | -1.14051500 | -1.60653300 |
| H | -0.20364900 | -2.63650400 | -0.70882700 |
| H | -2.63296600 | -2.16361300 | -1.16661100 |
| H | -2.28641900 | -2.25224700 | 0.55320900  |
| H | -2.62686000 | 0.30095400  | -1.09655800 |
| H | -3.74158100 | -0.30127000 | 0.11976200  |
| H | -0.06220900 | -1.34810500 | 1.40961000  |
| C | 1.66625500  | -0.94810800 | 0.28066500  |
| H | 2.04333800  | -1.96931700 | 0.35543400  |
| C | 2.54261700  | 0.02939800  | 0.05670900  |
| H | 2.18656700  | 1.04962600  | -0.04876600 |
| O | -0.13589000 | 1.27722000  | -0.59145000 |
| O | -0.41432700 | 2.68740100  | -0.35208200 |
| H | -1.09467900 | 2.84374900  | -1.02040100 |
| C | 4.02294300  | -0.17631100 | -0.08607000 |
| H | 4.57568900  | 0.39404800  | 0.66924400  |
| H | 4.29751800  | -1.22929000 | 0.01667300  |
| H | 4.37714700  | 0.17464100  | -1.06195700 |

R10

|   |             |             |             |
|---|-------------|-------------|-------------|
| C | -1.04253400 | 0.62336300  | -0.34798200 |
| H | -0.87385900 | 1.05684300  | -1.33059600 |
| C | -2.40005800 | 0.79321700  | 0.24493100  |
| H | -2.39414200 | 0.51899800  | 1.30463100  |
| O | -3.22425700 | -0.21148600 | -0.43823800 |
| O | -4.49573400 | -0.32039500 | 0.27591400  |
| H | -5.10424800 | -0.02145900 | -0.41366500 |
| C | -0.05436900 | -0.38212400 | 0.14780200  |
| H | -0.11412000 | -0.49484000 | 1.23623100  |
| O | -0.39176300 | -1.67679800 | -0.42706100 |
| O | -1.46125200 | -2.26489500 | 0.34705200  |
| H | -2.24399400 | -1.84595600 | -0.05854900 |
| C | -2.98687200 | 2.18459800  | 0.04865000  |
| H | -4.00544100 | 2.22359400  | 0.43859000  |
| H | -2.38959900 | 2.92706700  | 0.58356900  |
| H | -3.00012400 | 2.44806800  | -1.01238000 |
| C | 1.39377900  | -0.09258400 | -0.27465600 |
| C | 1.85725900  | 1.28401900  | 0.24023000  |
| C | 2.35866800  | -1.19480500 | 0.19890500  |
| H | 1.41204700  | -0.07078800 | -1.37391400 |
| C | 3.30795100  | 1.58630300  | -0.16402300 |



|      |             |             |             |
|------|-------------|-------------|-------------|
| H    | 1.77625100  | 1.29751700  | 1.33572400  |
| H    | 1.19525200  | 2.07365000  | -0.12918400 |
| C    | 3.80806900  | -0.89587300 | -0.20889900 |
| H    | 2.29828500  | -1.26889900 | 1.29340400  |
| H    | 2.03775600  | -2.15954300 | -0.19673900 |
| C    | 4.26798800  | 0.47950700  | 0.29235700  |
| H    | 3.61492300  | 2.55202100  | 0.25044300  |
| H    | 3.36300900  | 1.68472400  | -1.25587100 |
| H    | 4.47002500  | -1.67975600 | 0.17259300  |
| H    | 3.88919100  | -0.92785500 | -1.30322200 |
| H    | 5.28382900  | 0.69312900  | -0.05561500 |
| H    | 4.30972300  | 0.46834400  | 1.38930600  |
| TS10 |             |             |             |
| C    | -1.09560600 | 0.59882700  | 0.18111600  |
| H    | -4.82335600 | 0.32119600  | 0.79296800  |
| C    | -2.19075500 | 0.99475700  | -0.57975500 |
| H    | -2.16676300 | 0.74643600  | -1.63757600 |
| O    | -3.45989700 | -0.41550800 | -0.25469400 |
| O    | -4.08491100 | -0.27385100 | 0.99089200  |
| C    | -0.07574800 | -0.41196500 | -0.25465900 |
| H    | -0.06940500 | -0.51706700 | -1.34514300 |
| C    | 1.34218500  | -0.10680600 | 0.25556100  |
| C    | 2.34536100  | -1.19021600 | -0.17934900 |
| C    | 1.81759500  | 1.28423600  | -0.20589800 |
| H    | 1.29486600  | -0.10521400 | 1.35417100  |
| C    | 3.76447800  | -0.88357200 | 0.31901400  |
| H    | 2.35077000  | -1.24472200 | -1.27663600 |
| H    | 2.01122700  | -2.16475000 | 0.17972500  |
| C    | 3.23893300  | 1.59397300  | 0.28727900  |
| H    | 1.79881300  | 1.31900400  | -1.30376300 |
| H    | 1.12655000  | 2.05984000  | 0.14021900  |
| C    | 4.23668000  | 0.50545900  | -0.13083300 |
| H    | 4.45693200  | -1.65336200 | -0.03610100 |
| H    | 3.78123100  | -0.93419000 | 1.41546600  |
| H    | 3.55885600  | 2.57003600  | -0.09170100 |
| H    | 3.22910100  | 1.67334500  | 1.38200500  |
| H    | 5.22780000  | 0.72392600  | 0.27975400  |
| H    | 4.34266600  | 0.51407900  | -1.22347800 |
| H    | -1.05482400 | 0.90181000  | 1.22530700  |
| O    | -0.43909800 | -1.69657900 | 0.29937400  |
| O    | -1.44295900 | -2.29505800 | -0.54850200 |
| H    | -2.25457100 | -1.82321500 | -0.26661400 |
| C    | -3.00972000 | 2.20005100  | -0.21200000 |
| H    | -2.48046000 | 3.11490100  | -0.49639900 |

|     |             |             |             |
|-----|-------------|-------------|-------------|
| H   | -3.96787600 | 2.19793900  | -0.73665200 |
| H   | -3.18704800 | 2.23951800  | 0.86502800  |
| P10 |             |             |             |
| C   | 2.28945800  | -1.62653800 | -0.54859600 |
| C   | 0.89591800  | -0.98595000 | -0.62148100 |
| C   | 0.66216300  | -0.00976700 | 0.54678300  |
| C   | 1.77609300  | 1.05145200  | 0.60312400  |
| C   | 3.17115300  | 0.41299000  | 0.66831900  |
| C   | 3.39863600  | -0.56740700 | -0.49052200 |
| H   | 0.79351100  | -0.44068900 | -1.56620200 |
| H   | 0.12151900  | -1.75784800 | -0.62166500 |
| H   | 2.35081000  | -2.26197200 | 0.34496700  |
| H   | 2.44078800  | -2.28684100 | -1.40868700 |
| H   | 1.70507000  | 1.68566900  | -0.28747400 |
| H   | 1.62195300  | 1.70489100  | 1.46971100  |
| H   | 3.93957100  | 1.19297600  | 0.66320300  |
| H   | 3.27961500  | -0.12334100 | 1.62026600  |
| H   | 3.41420900  | -0.01027100 | -1.43615900 |
| H   | 4.37843100  | -1.04660300 | -0.39439100 |
| H   | 0.70395600  | -0.58862500 | 1.48081200  |
| C   | -0.74530800 | 0.63307700  | 0.53109800  |
| H   | -0.77697700 | 1.39321500  | 1.32445700  |
| C   | -1.85514300 | -0.36112000 | 0.76334100  |
| H   | -1.83140900 | -0.84388400 | 1.74028500  |
| C   | -2.81906200 | -0.66467100 | -0.10092900 |
| H   | -2.82900400 | -0.15630700 | -1.06108100 |
| O   | -0.85588900 | 1.31441600  | -0.72345700 |
| O   | -1.93731000 | 2.28452900  | -0.61820900 |
| H   | -1.43756100 | 3.09779100  | -0.77186000 |
| C   | -3.92025400 | -1.65167000 | 0.15116000  |
| H   | -3.83314400 | -2.11495500 | 1.13712100  |
| H   | -4.90183700 | -1.16866800 | 0.08741800  |
| H   | -3.91583200 | -2.44846800 | -0.60117000 |
| R11 |             |             |             |
| C   | -1.81210400 | 0.16616500  | 0.09835100  |
| C   | -2.95587700 | 0.96502300  | 0.62410400  |
| H   | -3.36808600 | 0.66123200  | 1.58299600  |
| O   | -2.15578500 | -1.25056800 | 0.07475600  |
| O   | -3.12526500 | -1.47186700 | -0.97559800 |
| H   | -3.95458600 | -1.38653400 | -0.48298500 |
| H   | -1.57673300 | 0.45453100  | -0.92946500 |
| C   | -0.55020300 | 0.22956300  | 0.98631800  |
| H   | -0.51884400 | 1.20169100  | 1.48602000  |

|      |             |             |             |
|------|-------------|-------------|-------------|
| H    | -0.66528200 | -0.51865600 | 1.77687200  |
| C    | 0.79721100  | 0.01861500  | 0.25412600  |
| C    | 1.17357100  | 1.24220600  | -0.60690900 |
| C    | 1.91099500  | -0.28689800 | 1.27264800  |
| C    | 2.55846500  | 1.11418100  | -1.25837100 |
| H    | 1.15617700  | 2.12178100  | 0.04759300  |
| H    | 0.41002400  | 1.39867800  | -1.37466900 |
| C    | 3.29111900  | -0.41765900 | 0.61582600  |
| H    | 1.92525700  | 0.52019600  | 2.01619900  |
| H    | 1.65182400  | -1.20801700 | 1.79847000  |
| C    | 3.64454900  | 0.82212600  | -0.21536900 |
| H    | 2.78872000  | 2.03598200  | -1.80255900 |
| H    | 2.53287700  | 0.30605000  | -1.99485800 |
| H    | 4.04812500  | -0.58791400 | 1.38807500  |
| H    | 3.29108500  | -1.30135600 | -0.02961200 |
| H    | 4.61225600  | 0.68500100  | -0.70832200 |
| H    | 3.75338800  | 1.68929100  | 0.45041600  |
| O    | 0.69507600  | -1.03550000 | -0.72415600 |
| O    | 0.41156200  | -2.29673500 | -0.06746300 |
| H    | -0.56278500 | -2.28652800 | -0.11346600 |
| C    | -3.35247600 | 2.27228300  | 0.03172700  |
| H    | -4.35784100 | 2.56825000  | 0.34168700  |
| H    | -2.67760700 | 3.08985600  | 0.33549300  |
| H    | -3.32416800 | 2.24018500  | -1.06291300 |
| TS11 |             |             |             |
| C    | 1.67986000  | 0.58597500  | 0.04986900  |
| C    | 2.79228500  | 1.23628300  | 0.57632800  |
| H    | 2.96376100  | 1.18325200  | 1.64963000  |
| O    | 2.43010100  | -1.06298300 | -0.60343500 |
| O    | 2.71255900  | -1.94103500 | 0.45850000  |
| H    | 3.66447200  | -1.82198000 | 0.58504600  |
| C    | 0.54639800  | 0.11219500  | 0.92865400  |
| H    | 0.80410600  | -0.87614600 | 1.32178600  |
| H    | 0.45055400  | 0.77045100  | 1.79816300  |
| C    | -0.82140000 | 0.04105300  | 0.21175100  |
| C    | -1.83456000 | -0.74779500 | 1.05894500  |
| C    | -1.36503500 | 1.44628500  | -0.11743500 |
| C    | -3.23293600 | -0.77760900 | 0.42913700  |
| H    | -1.88168300 | -0.28484400 | 2.05297000  |
| H    | -1.45482300 | -1.76277000 | 1.19084800  |
| C    | -2.76763900 | 1.41608000  | -0.74159300 |
| H    | -1.39146200 | 2.01437100  | 0.82012700  |
| H    | -0.66541500 | 1.96297900  | -0.78175900 |
| C    | -3.75460500 | 0.63486500  | 0.13529100  |

|     |             |             |             |
|-----|-------------|-------------|-------------|
| H   | -3.92214800 | -1.30787100 | 1.09417600  |
| H   | -3.18679200 | -1.35010100 | -0.50239000 |
| H   | -3.11970600 | 2.44183500  | -0.89305500 |
| H   | -2.70886400 | 0.94900000  | -1.72893600 |
| H   | -4.73303200 | 0.58401100  | -0.35309500 |
| H   | -3.90551300 | 1.17246400  | 1.08152300  |
| H   | 1.42243000  | 0.81148100  | -0.98063800 |
| O   | -0.67072400 | -0.55636100 | -1.09452200 |
| O   | -0.22200800 | -1.92929300 | -0.96355700 |
| H   | 0.74719600  | -1.79800700 | -1.00303400 |
| C   | 3.84364200  | 1.89112800  | -0.25327300 |
| H   | 4.80495700  | 1.36875900  | -0.16147000 |
| H   | 3.57228400  | 1.90896800  | -1.31027800 |
| H   | 4.02419600  | 2.92076300  | 0.07846000  |
| P11 |             |             |             |
| C   | -1.77079200 | -1.61506400 | -0.88046100 |
| C   | -0.42090900 | -1.24039500 | -0.25151600 |
| C   | -0.35201600 | 0.22285400  | 0.22293400  |
| C   | -1.56090500 | 0.56708600  | 1.11076400  |
| C   | -2.90435600 | 0.20162100  | 0.46483400  |
| C   | -2.94476800 | -1.27351100 | 0.04583800  |
| H   | -0.23193200 | -1.87082300 | 0.62551700  |
| H   | 0.39723500  | -1.42479800 | -0.95137400 |
| H   | -1.88704200 | -1.07880500 | -1.82750900 |
| H   | -1.77429300 | -2.68311300 | -1.12071700 |
| H   | -1.45066600 | 0.02238700  | 2.05580600  |
| H   | -1.52463100 | 1.63123100  | 1.35763700  |
| H   | -3.71939300 | 0.42513900  | 1.16060900  |
| H   | -3.06822700 | 0.82879200  | -0.41947400 |
| H   | -2.89737200 | -1.90452500 | 0.94344700  |
| H   | -3.89539200 | -1.50283700 | -0.44619600 |
| C   | 0.97312900  | 0.53791700  | 0.95202400  |
| H   | 0.93170700  | 1.59200300  | 1.24815000  |
| H   | 1.01118000  | -0.05293900 | 1.87310200  |
| C   | 2.21022600  | 0.30175900  | 0.13281100  |
| H   | 2.25904400  | 0.84148000  | -0.81063800 |
| C   | 3.22430300  | -0.48626100 | 0.48668400  |
| H   | 3.16649500  | -1.02269100 | 1.43404900  |
| O   | -0.41141000 | 0.95640000  | -1.02877200 |
| O   | -0.34896900 | 2.38644400  | -0.75944900 |
| H   | -1.22984800 | 2.65464600  | -1.05252500 |
| C   | 4.47439100  | -0.70093000 | -0.31633900 |
| H   | 4.45101800  | -0.13477700 | -1.25052100 |
| H   | 5.36441600  | -0.39363300 | 0.24468300  |

|      |             |             |             |
|------|-------------|-------------|-------------|
| H    | 4.61091700  | -1.75994300 | -0.56370900 |
| R12  |             |             |             |
| C    | -2.88548000 | -1.35259300 | -0.76205700 |
| C    | -1.44563700 | -1.47667700 | -0.24055400 |
| C    | -0.82211800 | -0.10766100 | 0.15033500  |
| C    | -1.75760900 | 0.64791800  | 1.11804800  |
| C    | -3.18808900 | 0.77058700  | 0.57969700  |
| C    | -3.78185700 | -0.59945900 | 0.22865900  |
| H    | -1.42513200 | -2.10852300 | 0.65415900  |
| H    | -0.80472100 | -1.95527700 | -0.98652900 |
| H    | -2.87493700 | -0.82512400 | -1.71993800 |
| H    | -3.28322000 | -2.35479800 | -0.95250300 |
| H    | -1.76138000 | 0.10639000  | 2.07176600  |
| H    | -1.33615100 | 1.63669400  | 1.31011200  |
| H    | -3.81209100 | 1.27736300  | 1.32257100  |
| H    | -3.17814000 | 1.40456900  | -0.31220300 |
| H    | -3.89332900 | -1.19439300 | 1.14524800  |
| H    | -4.78628800 | -0.48089800 | -0.18946000 |
| C    | 0.54612400  | -0.29645400 | 0.73831800  |
| H    | 0.62776900  | -0.39009600 | 1.81662200  |
| C    | 1.78804700  | -0.42055400 | -0.07956900 |
| O    | -0.75058000 | 0.56889400  | -1.12673300 |
| O    | -0.24124000 | 1.92054700  | -0.94987200 |
| H    | 0.68447300  | 1.77128100  | -1.21829400 |
| O    | 2.25678700  | 0.88751700  | -0.56655100 |
| O    | 2.52333200  | 1.74794600  | 0.57046100  |
| H    | 1.64576200  | 2.13849100  | 0.71562400  |
| C    | 2.91793800  | -1.16001700 | 0.63619600  |
| H    | 2.52467800  | -2.12741600 | 0.96818000  |
| H    | 3.17396900  | -0.59568500 | 1.53757600  |
| H    | 1.56420400  | -0.89662300 | -1.04259800 |
| C    | 4.16076600  | -1.36400200 | -0.23210200 |
| H    | 4.55630000  | -0.40612600 | -0.57372900 |
| H    | 4.94575500  | -1.87701500 | 0.32896900  |
| H    | 3.93358100  | -1.96856500 | -1.11584000 |
| TS12 |             |             |             |
| C    | 0.50437000  | -0.40966000 | 0.74259200  |
| H    | 3.76776600  | 1.54072700  | 0.54553700  |
| C    | 1.64111500  | -0.67237000 | -0.00570400 |
| H    | 1.49519700  | -0.86526600 | -1.06498900 |
| O    | 2.28499800  | 1.11673500  | -0.50953300 |
| O    | 2.83495200  | 1.80059500  | 0.57989500  |
| H    | 0.59045700  | -0.35969200 | 1.82549700  |

|     |             |             |             |
|-----|-------------|-------------|-------------|
| C   | -0.85765700 | -0.14345100 | 0.14392400  |
| C   | -1.55877100 | -1.48571500 | -0.19255700 |
| C   | -1.73391600 | 0.69596500  | 1.09460800  |
| C   | -2.99143000 | -1.28971800 | -0.71060800 |
| H   | -1.56685900 | -2.09511900 | 0.71839800  |
| H   | -0.95176400 | -2.02059600 | -0.92892000 |
| C   | -3.15559500 | 0.89313300  | 0.55795100  |
| H   | -1.76768200 | 0.17571100  | 2.06007700  |
| H   | -1.24794000 | 1.65859800  | 1.25734200  |
| C   | -3.83571300 | -0.44799100 | 0.25443400  |
| H   | -3.45207800 | -2.27079600 | -0.86703700 |
| H   | -2.95025900 | -0.79527600 | -1.68500500 |
| H   | -3.74259000 | 1.46141500  | 1.28647200  |
| H   | -3.10819600 | 1.49757500  | -0.35276700 |
| H   | -4.83193300 | -0.28164500 | -0.16737400 |
| H   | -3.98204900 | -1.00281700 | 1.19124400  |
| O   | -0.72709500 | 0.48073000  | -1.15046700 |
| O   | -0.32353600 | 1.86465300  | -1.00212700 |
| H   | 0.64804800  | 1.76690200  | -0.89768600 |
| C   | 2.88471600  | -1.24689800 | 0.62669100  |
| H   | 3.17439100  | -0.60313000 | 1.46541000  |
| H   | 2.62689900  | -2.21439800 | 1.07376200  |
| C   | 4.05257400  | -1.43319800 | -0.34557700 |
| H   | 4.93345200  | -1.82343400 | 0.16994400  |
| H   | 3.79187900  | -2.14023000 | -1.13825200 |
| H   | 4.32055900  | -0.49082900 | -0.82832400 |
| P12 |             |             |             |
| C   | -2.15721200 | -1.35625100 | -0.97959900 |
| C   | -0.66509500 | -1.17447900 | -0.66213400 |
| C   | -0.35444400 | 0.17426200  | 0.00973600  |
| C   | -1.26531000 | 0.39526400  | 1.23515200  |
| C   | -2.75383300 | 0.22035100  | 0.90638100  |
| C   | -3.03141700 | -1.14403500 | 0.26294100  |
| H   | -0.34052300 | -1.96521200 | 0.02246500  |
| H   | -0.06488000 | -1.26688900 | -1.57152600 |
| H   | -2.44898800 | -0.64313100 | -1.75581200 |
| H   | -2.31660200 | -2.35829500 | -1.39107300 |
| H   | -0.96235800 | -0.32434100 | 2.00476500  |
| H   | -1.07622200 | 1.39267000  | 1.63787500  |
| H   | -3.34384600 | 0.33820300  | 1.82103200  |
| H   | -3.06423400 | 1.01704600  | 0.22330400  |
| H   | -2.82642600 | -1.93887200 | 0.99294200  |
| H   | -4.08984300 | -1.23060200 | -0.00281200 |
| C   | 1.09634200  | 0.36596300  | 0.38889300  |

|   |             |             |             |
|---|-------------|-------------|-------------|
| H | 1.31916500  | 1.36054900  | 0.77109100  |
| C | 2.08047400  | -0.52889700 | 0.32323100  |
| H | 1.87812800  | -1.53143900 | -0.04905800 |
| O | -0.70062000 | 1.12219400  | -1.04680300 |
| O | -0.57502400 | 2.48312500  | -0.55064100 |
| H | 0.19803900  | 2.77521600  | -1.05171300 |
| C | 3.50623900  | -0.26764700 | 0.72449500  |
| H | 3.59648300  | 0.74878700  | 1.12088900  |
| H | 3.77902200  | -0.94687000 | 1.54263200  |
| C | 4.49739100  | -0.46880500 | -0.43344400 |
| H | 5.52607500  | -0.30149100 | -0.10309300 |
| H | 4.43701200  | -1.48546800 | -0.83325000 |
| H | 4.28634200  | 0.22323700  | -1.25302600 |

### R13

|   |             |             |             |
|---|-------------|-------------|-------------|
| C | 1.00439900  | 0.24099000  | 0.07096700  |
| C | 2.24673600  | -0.53743300 | 0.31543300  |
| H | 2.21972200  | -1.33723100 | 1.05098300  |
| O | 1.15809800  | 1.46158000  | 0.88775000  |
| O | 0.62415300  | 2.61980800  | 0.17220200  |
| H | 1.44095900  | 3.09658000  | -0.02519500 |
| H | 0.94804000  | 0.58562000  | -0.96578100 |
| C | -0.28214300 | -0.51182700 | 0.44730700  |
| C | -1.51324800 | 0.40881800  | 0.43343800  |
| C | -0.50488400 | -1.74315100 | -0.45377700 |
| H | -0.16862800 | -0.85569900 | 1.48468800  |
| C | -2.80613800 | -0.33125300 | 0.78313200  |
| H | -1.34705600 | 1.23456500  | 1.12695300  |
| C | -1.79556500 | -2.48893500 | -0.08085200 |
| H | -0.56422700 | -1.41226300 | -1.49708000 |
| H | 0.35389600  | -2.41787100 | -0.38535600 |
| C | -3.01570700 | -1.55824400 | -0.11372900 |
| H | -3.63953700 | 0.37018100  | 0.68906200  |
| H | -2.76036500 | -0.63760300 | 1.83628900  |
| H | -1.94401100 | -3.33274900 | -0.76210700 |
| H | -1.68851400 | -2.91576200 | 0.92533400  |
| H | -3.91578600 | -2.09977600 | 0.19328800  |
| H | -3.18395300 | -1.21772500 | -1.14067800 |
| O | -1.58959600 | 0.96089600  | -0.89806800 |
| O | -2.11891600 | 2.30261800  | -0.80838400 |
| H | -1.29674500 | 2.78058500  | -0.60379700 |
| C | 3.57381600  | -0.09397400 | -0.20107700 |
| H | 3.99283700  | 0.66615500  | 0.47876000  |
| H | 3.44086300  | 0.41987000  | -1.16173600 |

|      |             |             |             |
|------|-------------|-------------|-------------|
| C    | 4.58885000  | -1.23549200 | -0.35186100 |
| H    | 5.55241400  | -0.86010500 | -0.70533100 |
| H    | 4.75784400  | -1.73816100 | 0.60486100  |
| H    | 4.23564700  | -1.98482300 | -1.06504800 |
| TS13 |             |             |             |
| C    | 0.93658500  | -0.37039900 | -0.19248400 |
| C    | 2.03166400  | -1.18540200 | 0.05814000  |
| H    | 1.97379200  | -1.89381400 | 0.88351800  |
| O    | 1.48005100  | 1.19389800  | 0.82028100  |
| O    | 1.41029700  | 2.32873100  | -0.01654000 |
| H    | 2.33733300  | 2.53400600  | -0.19983500 |
| H    | 0.93536700  | 0.20401200  | -1.11296200 |
| C    | -0.43936700 | -0.70518200 | 0.34070000  |
| C    | -1.33735600 | 0.54042300  | 0.48242900  |
| C    | -1.10893100 | -1.77063100 | -0.56411600 |
| H    | -0.33188900 | -1.13140900 | 1.34644500  |
| C    | -2.76453200 | 0.19944700  | 0.91456400  |
| H    | -0.87324800 | 1.22237300  | 1.19310000  |
| C    | -2.53118600 | -2.10831600 | -0.09298200 |
| H    | -1.14650100 | -1.38899500 | -1.59055900 |
| H    | -0.48898500 | -2.67232200 | -0.58403500 |
| C    | -3.40622400 | -0.85176300 | 0.00127800  |
| H    | -3.34758900 | 1.12434300  | 0.92044600  |
| H    | -2.73730700 | -0.16881400 | 1.94859400  |
| H    | -2.97999000 | -2.83527900 | -0.77743600 |
| H    | -2.48200600 | -2.59462000 | 0.89044900  |
| H    | -4.40536000 | -1.10956900 | 0.36580700  |
| H    | -3.53275700 | -0.42147800 | -0.99770100 |
| O    | -1.33466400 | 1.18525200  | -0.80818500 |
| O    | -1.43648100 | 2.61466200  | -0.60800500 |
| H    | -0.49249800 | 2.83169800  | -0.50951200 |
| C    | 3.35230000  | -1.06096500 | -0.63015600 |
| H    | 3.59379300  | -2.01399200 | -1.12163300 |
| H    | 3.28493200  | -0.31178000 | -1.42529300 |
| C    | 4.49785800  | -0.70465900 | 0.33634900  |
| H    | 4.61510700  | -1.47240500 | 1.10637100  |
| H    | 5.44728700  | -0.61959300 | -0.19892400 |
| H    | 4.29203000  | 0.24196900  | 0.84042700  |
| P13  |             |             |             |
| C    | -2.21959300 | 0.64294800  | 0.99999500  |
| C    | -0.74405500 | 0.57922400  | 0.58645300  |
| C    | -0.27744900 | -0.87694500 | 0.40316100  |
| C    | -1.18174800 | -1.62110700 | -0.60818700 |
| C    | -2.66012100 | -1.55359700 | -0.19830700 |



|   |             |             |             |
|---|-------------|-------------|-------------|
| C | -3.12533500 | -0.10584600 | 0.01154900  |
| H | -0.11423200 | 1.07685400  | 1.33190600  |
| H | -2.31431200 | 0.20743000  | 2.00200800  |
| H | -2.51579100 | 1.69128100  | 1.08601700  |
| H | -1.04377600 | -1.17746800 | -1.59915300 |
| H | -0.85768000 | -2.66432200 | -0.68138500 |
| H | -3.28143300 | -2.04365000 | -0.95475600 |
| H | -2.80129800 | -2.11743500 | 0.73336200  |
| H | -3.11367500 | 0.41612500  | -0.95190800 |
| H | -4.16066700 | -0.08552500 | 0.36595300  |
| H | -0.46189500 | -1.34287100 | 1.38359500  |
| C | 1.18991800  | -1.08032100 | 0.10892200  |
| H | 1.50477800  | -2.12317700 | 0.17259100  |
| C | 2.10726400  | -0.16701500 | -0.20549300 |
| H | 1.81410500  | 0.87513100  | -0.29938200 |
| O | -0.53235000 | 1.23742700  | -0.67521400 |
| O | -0.69843500 | 2.66788000  | -0.45240100 |
| H | -1.41845300 | 2.85501300  | -1.06926700 |
| C | 3.55923800  | -0.46895100 | -0.45502200 |
| H | 3.72726300  | -1.54997100 | -0.40415100 |
| H | 3.81962000  | -0.15950700 | -1.47563300 |
| C | 4.49579200  | 0.25048700  | 0.52967900  |
| H | 5.54455400  | 0.04195600  | 0.30020400  |
| H | 4.35362100  | 1.33443800  | 0.48745700  |
| H | 4.30207500  | -0.07002200 | 1.55695800  |

#### R14

|   |             |             |             |
|---|-------------|-------------|-------------|
| C | -1.68887300 | 0.21286000  | 0.72950000  |
| C | -0.26420600 | -0.06495600 | 1.22223000  |
| C | 0.86023100  | 0.28543400  | 0.22567600  |
| C | 0.65324100  | 1.71704500  | -0.33337100 |
| C | -0.75922200 | 1.94389500  | -0.89048200 |
| C | -1.83800500 | 1.62481800  | 0.15322700  |
| H | -0.11209800 | 0.53290000  | 2.12755700  |
| H | -0.16894900 | -1.10894000 | 1.52134200  |
| H | -2.39086200 | 0.06141600  | 1.55922500  |
| H | 0.85483300  | 2.41910100  | 0.48330200  |
| H | 1.40433800  | 1.90077700  | -1.10573300 |
| H | -0.86142700 | 2.98423400  | -1.21513000 |
| H | -0.90568900 | 1.31444200  | -1.77012100 |
| H | -1.76866900 | 2.32525000  | 0.99383200  |
| H | -2.83932300 | 1.73649800  | -0.27210000 |
| C | 2.20866900  | 0.12284100  | 0.86204400  |
| H | 2.26798200  | 0.10213900  | 1.94517800  |

|   |             |             |             |
|---|-------------|-------------|-------------|
| O | 0.76884700  | -0.52071000 | -0.97825300 |
| O | 0.85044400  | -1.92752700 | -0.63774300 |
| H | -0.09454400 | -2.15793200 | -0.59063700 |
| O | -2.09742400 | -0.64167300 | -0.35183600 |
| O | -1.95235000 | -2.03033900 | 0.08980400  |
| H | -2.75671700 | -2.40309400 | -0.29480900 |
| C | 3.42451200  | -0.16919700 | 0.05532100  |
| H | 4.33786300  | 0.07949200  | 0.60206900  |
| H | 3.47328100  | -1.23552800 | -0.20997200 |
| H | 3.42577300  | 0.37480100  | -0.89464700 |

#### TS14

|   |             |             |             |
|---|-------------|-------------|-------------|
| C | -1.56536100 | 0.56773200  | 0.74749000  |
| C | -0.24161600 | -0.01808200 | 1.25900400  |
| C | 0.98562100  | 0.17762400  | 0.38155400  |
| C | 1.04915700  | 1.45649700  | -0.43523700 |
| C | -0.30667600 | 1.91353900  | -0.98864400 |
| C | -1.38329200 | 1.94283900  | 0.10136900  |
| H | -0.04478100 | 0.46500300  | 2.22449900  |
| H | -0.36743700 | -1.08120800 | 1.47661000  |
| H | -2.27279300 | 0.62398800  | 1.58305900  |
| H | 1.46419600  | 2.24602100  | 0.20769600  |
| H | 1.75576300  | 1.32058000  | -1.25701500 |
| H | -0.20153600 | 2.90867600  | -1.43117700 |
| H | -0.61644000 | 1.23304500  | -1.78299200 |
| H | -1.10386100 | 2.64575500  | 0.89538100  |
| H | -2.34230200 | 2.27940700  | -0.30182700 |
| C | 2.16392500  | -0.43370100 | 0.80817400  |
| H | 2.06359800  | -1.26837200 | 1.49615500  |
| O | 0.62665600  | -0.97439400 | -1.13182600 |
| O | 0.14505900  | -2.22766500 | -0.75620800 |
| H | -0.80535100 | -2.07461600 | -0.60981700 |
| O | -2.18537900 | -0.21644600 | -0.28564900 |
| O | -2.47674900 | -1.53906800 | 0.27039700  |
| H | -3.37934800 | -1.65596200 | -0.05567300 |
| C | 3.51981500  | -0.19701300 | 0.22520200  |
| H | 3.62510700  | -0.73260400 | -0.72828100 |
| H | 3.71657900  | 0.85973600  | 0.02386500  |
| H | 4.30247300  | -0.56547000 | 0.89233200  |

#### P14

|   |             |             |             |
|---|-------------|-------------|-------------|
| C | -1.35498100 | -0.17825300 | 0.72758800  |
| C | 0.02157500  | -0.47997200 | 1.33984800  |
| C | 1.17177200  | -0.03542700 | 0.46038300  |
| C | 1.06184400  | 1.40290900  | 0.00911300  |
| C | -0.29988400 | 1.66902000  | -0.66378000 |

|   |             |             |             |
|---|-------------|-------------|-------------|
| C | -1.46652400 | 1.27228200  | 0.24894900  |
| H | 0.06279100  | 0.05804300  | 2.29690400  |
| H | 0.08955800  | -1.54700800 | 1.56285900  |
| H | -2.14221900 | -0.40048100 | 1.45660600  |
| H | 1.15027800  | 2.05963600  | 0.88720700  |
| H | 1.87272600  | 1.67636400  | -0.66751900 |
| H | -0.38184800 | 2.72549300  | -0.93769800 |
| H | -0.35261100 | 1.09297400  | -1.59348500 |
| H | -1.48566300 | 1.92178100  | 1.13296200  |
| H | -2.42607700 | 1.40421400  | -0.25697300 |
| C | 2.15552800  | -0.88110900 | 0.13798500  |
| H | 2.08088600  | -1.89618500 | 0.52559600  |
| O | -1.48580600 | -1.11570600 | -0.35281400 |
| O | -2.86889500 | -1.06500400 | -0.80672100 |
| H | -2.73435400 | -0.83763600 | -1.73616500 |
| C | 3.37457900  | -0.62043800 | -0.69908100 |
| H | 3.42707300  | 0.40094300  | -1.07773900 |
| H | 4.28783400  | -0.80817200 | -0.12262600 |
| H | 3.40578900  | -1.29835700 | -1.55966700 |

#### R15

|   |             |             |             |
|---|-------------|-------------|-------------|
| C | -2.00867900 | 0.24934800  | 0.81346600  |
| C | -0.55761600 | -0.05991400 | 1.19864900  |
| C | 0.49611600  | 0.25886300  | 0.11750500  |
| C | 0.28073600  | 1.69256400  | -0.43306700 |
| C | -1.16426800 | 1.95051200  | -0.88294500 |
| C | -2.16804400 | 1.66189100  | 0.24128800  |
| H | -0.32341700 | 0.53858800  | 2.08583600  |
| H | -0.46424100 | -1.10437700 | 1.49672500  |
| H | -2.64887000 | 0.11847300  | 1.69505200  |
| H | 0.56006500  | 2.39319100  | 0.36161500  |
| H | 0.97516500  | 1.85493800  | -1.26124000 |
| H | -1.26630900 | 2.99156700  | -1.20534300 |
| H | -1.39173500 | 1.32092000  | -1.74508500 |
| H | -2.01894800 | 2.36422900  | 1.06985300  |
| H | -3.19580800 | 1.79540600  | -0.10781800 |
| C | 1.88459700  | 0.06694800  | 0.65074400  |
| H | 2.02698300  | 0.05126700  | 1.72760600  |
| O | 0.29330100  | -0.55053500 | -1.07095300 |
| O | 0.36668600  | -1.95738300 | -0.72902800 |
| H | -0.57714800 | -2.16451600 | -0.60793600 |
| O | -2.51816300 | -0.60019800 | -0.22822000 |
| O | -2.37320600 | -1.98992100 | 0.21049200  |
| H | -3.21288000 | -2.34502500 | -0.11003900 |

|      |             |             |             |
|------|-------------|-------------|-------------|
| C    | 3.03729000  | -0.26234900 | -0.23504800 |
| H    | 2.99096200  | -1.33093500 | -0.49819900 |
| H    | 2.93093300  | 0.25849800  | -1.19439900 |
| C    | 4.40143700  | 0.05096700  | 0.39152400  |
| H    | 4.53727200  | -0.49447300 | 1.33054200  |
| H    | 5.21718600  | -0.23449400 | -0.27795300 |
| H    | 4.50242400  | 1.11807100  | 0.60975400  |
| TS15 |             |             |             |
| C    | -1.92755300 | 0.39894600  | 0.85595300  |
| C    | -0.50694400 | -0.05029500 | 1.22663700  |
| C    | 0.60663600  | 0.31104700  | 0.25541700  |
| C    | 0.45587200  | 1.61393400  | -0.50971600 |
| C    | -0.98585600 | 1.93286700  | -0.92524100 |
| C    | -1.95627800 | 1.80555500  | 0.25390700  |
| H    | -0.27779100 | 0.42031700  | 2.19117500  |
| H    | -0.49558000 | -1.12731300 | 1.40911000  |
| H    | -2.55858100 | 0.34892800  | 1.75099600  |
| H    | 0.83821200  | 2.42364500  | 0.12852000  |
| H    | 1.09823800  | 1.58599300  | -1.39292000 |
| H    | -1.03082000 | 2.94720200  | -1.33303400 |
| H    | -1.28955300 | 1.24751400  | -1.71779100 |
| H    | -1.68505800 | 2.51010600  | 1.04933100  |
| H    | -2.97893800 | 2.04422600  | -0.05063500 |
| C    | 1.88007500  | -0.17385700 | 0.54919700  |
| H    | 1.94297400  | -1.03220400 | 1.21387400  |
| O    | 0.23958900  | -0.82744300 | -1.26923400 |
| O    | -0.06669100 | -2.13764200 | -0.90524500 |
| H    | -1.01119900 | -2.09695900 | -0.67208000 |
| O    | -2.54897500 | -0.41702500 | -0.15145400 |
| O    | -2.64344700 | -1.78076400 | 0.37262400  |
| H    | -3.55435700 | -1.98701800 | 0.12286400  |
| C    | 3.14352500  | 0.24146000  | -0.14147800 |
| H    | 3.07985600  | -0.06440800 | -1.19580900 |
| H    | 3.22994300  | 1.33549000  | -0.15822100 |
| C    | 4.40257800  | -0.36233300 | 0.48960800  |
| H    | 4.36426700  | -1.45523700 | 0.47003700  |
| H    | 5.30177000  | -0.05047400 | -0.04749400 |
| H    | 4.51047900  | -0.05077200 | 1.53284500  |
| P15  |             |             |             |
| C    | -1.78046500 | -0.25361800 | 0.73400900  |
| C    | -0.37521700 | -0.44150900 | 1.32669000  |
| C    | 0.72075000  | 0.10415600  | 0.43472800  |
| C    | 0.48330900  | 1.53282600  | 0.00159100  |
| C    | -0.90366800 | 1.68733600  | -0.65443400 |

|     |             |             |             |
|-----|-------------|-------------|-------------|
| C   | -2.02136100 | 1.18523900  | 0.26768100  |
| H   | -0.36633200 | 0.09279100  | 2.28658300  |
| H   | -0.21433600 | -1.50024800 | 1.54114900  |
| H   | -2.53634200 | -0.54672300 | 1.47112200  |
| H   | 0.52319100  | 2.18410200  | 0.88718500  |
| H   | 1.26071500  | 1.88296900  | -0.67888000 |
| H   | -1.07856000 | 2.73517300  | -0.91774200 |
| H   | -0.91766300 | 1.11641700  | -1.58865800 |
| H   | -2.08600100 | 1.82465900  | 1.15686500  |
| H   | -2.99447000 | 1.23753600  | -0.22670300 |
| C   | 1.76317800  | -0.65640200 | 0.08391000  |
| H   | 1.78038100  | -1.67772000 | 0.46497300  |
| O   | -1.84518000 | -1.19185900 | -0.35160000 |
| O   | -3.23364300 | -1.25657700 | -0.78711700 |
| H   | -3.13100900 | -1.01620600 | -1.71735700 |
| C   | 2.95109100  | -0.29345300 | -0.76399400 |
| H   | 2.85014500  | 0.71282100  | -1.17726900 |
| H   | 2.99117300  | -0.97501600 | -1.62365300 |
| C   | 4.27883600  | -0.39842800 | 0.00633400  |
| H   | 4.41951500  | -1.40412100 | 0.41356600  |
| H   | 5.13021800  | -0.17981700 | -0.64440800 |
| H   | 4.30124300  | 0.30397800  | 0.84388200  |
| R16 |             |             |             |
| C   | -2.46084600 | 0.21729100  | 0.75928100  |
| C   | -1.01904200 | -0.05100300 | 1.20514100  |
| C   | 0.06909700  | 0.28636200  | 0.16450100  |
| C   | -0.16081400 | 1.70919900  | -0.40797400 |
| C   | -1.59262600 | 1.92538900  | -0.91803700 |
| C   | -2.63314600 | 1.62032700  | 0.16778900  |
| H   | -0.83640400 | 0.56034100  | 2.09567900  |
| H   | -0.91095500 | -1.09030100 | 1.51595400  |
| H   | -3.13244600 | 0.07730500  | 1.61574600  |
| H   | 0.06789100  | 2.42366500  | 0.39055900  |
| H   | 0.56215400  | 1.88260100  | -1.20905100 |
| H   | -1.70838200 | 2.96061100  | -1.25430400 |
| H   | -1.76878400 | 1.28265600  | -1.78249500 |
| H   | -2.53556600 | 2.33330600  | 0.99493200  |
| H   | -3.64909900 | 1.72415000  | -0.22345100 |
| C   | 1.43905800  | 0.13553000  | 0.75556800  |
| H   | 1.53729400  | 0.13537200  | 1.83740000  |
| O   | -0.06428500 | -0.53804600 | -1.02338500 |
| O   | 0.03181700  | -1.93954300 | -0.66547700 |
| H   | -0.91045300 | -2.17048900 | -0.58079000 |

|      |             |             |             |
|------|-------------|-------------|-------------|
| O    | -2.90620400 | -0.65379400 | -0.29392500 |
| O    | -2.74286700 | -2.03565000 | 0.16287700  |
| H    | -3.55917600 | -2.41540500 | -0.18828200 |
| C    | 2.63590200  | -0.16746300 | -0.07870600 |
| H    | 2.63959000  | -1.24218900 | -0.32500700 |
| H    | 2.55170500  | 0.33389000  | -1.05163500 |
| C    | 3.96831800  | 0.20147000  | 0.58968100  |
| H    | 4.03808400  | -0.31152700 | 1.55645400  |
| H    | 3.97632400  | 1.27471500  | 0.81228500  |
| C    | 5.18599100  | -0.15608600 | -0.26636100 |
| H    | 6.11993800  | 0.11242000  | 0.23504300  |
| H    | 5.21749800  | -1.22927400 | -0.47829100 |
| H    | 5.16173600  | 0.36833900  | -1.22676800 |
| TS16 |             |             |             |
| C    | -2.36802500 | 0.40387000  | 0.82761500  |
| C    | -0.95840800 | -0.05070700 | 1.23230200  |
| C    | 0.17944800  | 0.30667600  | 0.28820200  |
| C    | 0.05219300  | 1.61103000  | -0.47850000 |
| C    | -1.37762200 | 1.93511000  | -0.92959300 |
| C    | -2.37725300 | 1.81063400  | 0.22522500  |
| H    | -0.75074800 | 0.41894900  | 2.20217800  |
| H    | -0.95547100 | -1.12778600 | 1.41475800  |
| H    | -3.02058800 | 0.35615500  | 1.70721500  |
| H    | 0.42076800  | 2.41848300  | 0.17062800  |
| H    | 0.71692400  | 1.58261200  | -1.34499500 |
| H    | -1.40906400 | 2.94978700  | -1.33781300 |
| H    | -1.66386500 | 1.25111000  | -1.72977700 |
| H    | -2.12339700 | 2.51419600  | 1.02723300  |
| H    | -3.39134800 | 2.05265800  | -0.10429300 |
| C    | 1.44380100  | -0.18324700 | 0.61152600  |
| H    | 1.48787800  | -1.04062300 | 1.27885600  |
| O    | -0.15549800 | -0.82866400 | -1.24563800 |
| O    | -0.47518200 | -2.13812000 | -0.89006300 |
| H    | -1.42478600 | -2.09399300 | -0.67941700 |
| O    | -2.96808200 | -0.40984300 | -0.19447600 |
| O    | -3.08056300 | -1.77311600 | 0.32729700  |
| H    | -3.98620100 | -1.97558700 | 0.05618900  |
| C    | 2.72383500  | 0.22884400  | -0.04870300 |
| H    | 2.67417600  | -0.04568500 | -1.11325600 |
| H    | 2.83194600  | 1.32232900  | -0.03294100 |
| C    | 3.96811800  | -0.41169700 | 0.58005200  |
| H    | 3.86415000  | -1.50201800 | 0.54210300  |
| H    | 4.01315300  | -0.14447700 | 1.64247600  |
| C    | 5.26951900  | 0.00367700  | -0.10942400 |

|     |             |             |             |
|-----|-------------|-------------|-------------|
| H   | 5.41783400  | 1.08703600  | -0.05733900 |
| H   | 6.13684000  | -0.47222800 | 0.35587800  |
| H   | 5.26275900  | -0.27810800 | -1.16686400 |
| P16 |             |             |             |
| C   | -2.30792500 | -0.25007400 | 0.67729400  |
| C   | -0.94215200 | -0.43120200 | 1.35775000  |
| C   | 0.20667900  | 0.10803500  | 0.53080800  |
| C   | -0.00409600 | 1.53271100  | 0.07158900  |
| C   | -1.34812900 | 1.68087400  | -0.66976300 |
| C   | -2.52046400 | 1.18468400  | 0.18530400  |
| H   | -0.99335900 | 0.11128400  | 2.31170700  |
| H   | -0.79420500 | -1.48788900 | 1.59086800  |
| H   | -3.10800100 | -0.53821300 | 1.36828300  |
| H   | -0.01860200 | 2.19161100  | 0.95231000  |
| H   | 0.81375500  | 1.87733400  | -0.56272900 |
| H   | -1.50698900 | 2.72653100  | -0.95130400 |
| H   | -1.30420800 | 1.10303400  | -1.59879500 |
| H   | -2.64072700 | 1.83107700  | 1.06360400  |
| H   | -3.46106000 | 1.23187400  | -0.36891600 |
| C   | 1.26905600  | -0.65461400 | 0.25131600  |
| H   | 1.26217500  | -1.67246700 | 0.64144100  |
| O   | -2.30403300 | -1.19716700 | -0.40251600 |
| O   | -3.66242300 | -1.26700400 | -0.92360900 |
| H   | -3.50204700 | -1.03277100 | -1.84723000 |
| C   | 2.50658400  | -0.29690800 | -0.52369300 |
| H   | 2.42388300  | 0.69786000  | -0.97026200 |
| H   | 2.61559400  | -1.00006000 | -1.36097400 |
| C   | 3.78715000  | -0.36085700 | 0.33088400  |
| H   | 3.86251800  | -1.35307800 | 0.79096800  |
| H   | 3.69784100  | 0.35197000  | 1.15803300  |
| C   | 5.05772300  | -0.06974500 | -0.47204200 |
| H   | 5.94895500  | -0.12216900 | 0.15920200  |
| H   | 5.18451900  | -0.78970000 | -1.28670700 |
| H   | 5.02504500  | 0.92973100  | -0.91719100 |

# R17

|   |             |             |             |
|---|-------------|-------------|-------------|
| C | 2.29507300  | -1.34110600 | -0.33012400 |
| C | 0.80375700  | -1.66011200 | -0.54313900 |
| C | -0.10174700 | -0.87367700 | 0.35169500  |
| C | 0.21935100  | 0.55747400  | 0.64522600  |
| C | 1.71315400  | 0.83738800  | 0.80812800  |
| C | 2.54535000  | 0.17098200  | -0.29293700 |
| H | 0.53832300  | -1.43472100 | -1.59116400 |
| H | 0.61697800  | -2.73258800 | -0.42015600 |

|      |             |             |             |
|------|-------------|-------------|-------------|
| H    | 2.62587000  | -1.78574000 | 0.61637500  |
| H    | 2.88598900  | -1.80993200 | -1.12231300 |
| H    | -0.34594700 | 0.90507500  | 1.51676800  |
| H    | 1.86132600  | 1.91954200  | 0.82107500  |
| H    | 2.02197600  | 0.45795800  | 1.78996600  |
| H    | 2.28230800  | 0.61343200  | -1.25974700 |
| H    | 3.60774100  | 0.37489100  | -0.12993100 |
| H    | -1.94890500 | 0.42151200  | -1.08519900 |
| C    | -1.45645900 | -1.38785300 | 0.73473700  |
| H    | -1.67774300 | -2.33499800 | 0.23113900  |
| H    | -1.53472400 | -1.54632700 | 1.82048300  |
| O    | -2.50974600 | -0.45057000 | 0.49052200  |
| O    | -2.61663100 | -0.27632900 | -0.94648100 |
| O    | -0.31159900 | 1.29405500  | -0.51411000 |
| O    | -0.29293000 | 2.71810600  | -0.22120700 |
| H    | -1.19682200 | 2.85122200  | 0.10140800  |
| TS17 |             |             |             |
| C    | 1.92671600  | -1.62970500 | -0.46801300 |
| C    | 0.38516900  | -1.64014700 | -0.50322800 |
| C    | -0.21404000 | -0.78471700 | 0.57447900  |
| C    | 0.37470500  | 0.59157400  | 0.74591000  |
| C    | 1.90478900  | 0.59323600  | 0.74798700  |
| C    | 2.47772300  | -0.19899100 | -0.43394400 |
| H    | 0.04747200  | -1.25395600 | -1.47764100 |
| H    | -0.00122800 | -2.66028600 | -0.43087000 |
| H    | 2.26898000  | -2.17455600 | 0.42021300  |
| H    | 2.31453000  | -2.16812400 | -1.33766300 |
| H    | -0.02259500 | 1.07109100  | 1.64688600  |
| H    | 2.25378800  | 1.62808000  | 0.73733000  |
| H    | 2.23683500  | 0.14905200  | 1.69433600  |
| H    | 2.22198500  | 0.31493000  | -1.36629300 |
| H    | 3.56990700  | -0.21575800 | -0.37130900 |
| H    | -1.90348900 | 0.55057900  | -1.25066000 |
| C    | -1.40880000 | -1.10482400 | 1.19714500  |
| H    | -1.79455300 | -2.11322100 | 1.10544600  |
| H    | -1.70494800 | -0.56928100 | 2.09209800  |
| O    | -2.75546600 | -0.18650600 | 0.22542200  |
| O    | -2.51582100 | -0.19924400 | -1.14369800 |
| O    | -0.14286200 | 1.33078900  | -0.40475200 |
| O    | 0.21877600  | 2.72886400  | -0.26727100 |
| H    | -0.60128800 | 3.09167500  | 0.09850000  |
| P17  |             |             |             |
| C    | -0.41759800 | -0.93012600 | 1.08423800  |
| C    | -0.58877100 | 0.47047200  | 0.47921900  |



|   |             |             |             |
|---|-------------|-------------|-------------|
| C | 0.74126300  | 1.04423700  | 0.03498900  |
| C | 1.55603100  | 0.14191600  | -0.86045300 |
| C | 1.72475100  | -1.25795600 | -0.23596800 |
| C | 0.36933400  | -1.86266500 | 0.15375100  |
| H | -1.07591400 | 1.14246800  | 1.19496900  |
| H | 0.11031200  | -0.81682000 | 2.03875700  |
| H | -1.40518200 | -1.33983600 | 1.30602800  |
| H | 1.03674400  | 0.03829400  | -1.82062300 |
| H | 2.52906700  | 0.59682900  | -1.06472500 |
| H | 2.24672800  | -1.91448600 | -0.93909000 |
| H | 2.36005500  | -1.17764900 | 0.65474700  |
| H | -0.22208900 | -2.04572900 | -0.74918100 |
| H | 0.51345500  | -2.83266000 | 0.63959700  |
| C | 1.15431400  | 2.23516300  | 0.46482200  |
| H | 2.12408500  | 2.63342100  | 0.18460300  |
| H | 0.53950000  | 2.85149100  | 1.11231300  |
| O | -1.38528600 | 0.43411500  | -0.72492700 |
| O | -2.71103400 | -0.05188000 | -0.37391300 |
| H | -3.22214800 | 0.76055400  | -0.49026800 |

R18

|   |             |             |             |
|---|-------------|-------------|-------------|
| C | 1.69114500  | -2.05015000 | -0.39615900 |
| C | 0.23053900  | -1.63006500 | -0.65836200 |
| C | -0.25681800 | -0.59443400 | 0.30754300  |
| C | 0.67286100  | 0.52781300  | 0.65939900  |
| C | 2.12160900  | 0.08907400  | 0.87515300  |
| C | 2.61135000  | -0.83416000 | -0.24555600 |
| H | 0.16406200  | -1.21657900 | -1.67962300 |
| H | -0.42081700 | -2.50687100 | -0.65319300 |
| H | 1.73118500  | -2.65200500 | 0.51995900  |
| H | 2.03503300  | -2.69348700 | -1.21150400 |
| H | 0.29454100  | 1.07871300  | 1.52687700  |
| H | 2.74471500  | 0.98271200  | 0.95676900  |
| H | 2.17583700  | -0.43141500 | 1.83928400  |
| H | 2.63828700  | -0.27350400 | -1.18594700 |
| H | 3.63624500  | -1.15722700 | -0.03982900 |
| H | -1.23240800 | 1.37855900  | -1.16698500 |
| C | -1.69588500 | -0.43471800 | 0.72521100  |
| H | -1.73736400 | -0.36676600 | 1.82317300  |
| O | -2.18037200 | 0.88882800  | 0.38309900  |
| O | -2.13927600 | 1.03571200  | -1.06205000 |
| O | 0.58907900  | 1.44537700  | -0.48708400 |
| O | 1.23178200  | 2.70094700  | -0.13811000 |
| H | 0.46928000  | 3.22014600  | 0.15829200  |

|      |             |             |             |
|------|-------------|-------------|-------------|
| C    | -2.66741200 | -1.50938900 | 0.25346700  |
| H    | -2.37225700 | -2.49608600 | 0.61979600  |
| H    | -3.66339300 | -1.28259300 | 0.63736800  |
| H    | -2.71699100 | -1.53433400 | -0.83546900 |
| TS18 |             |             |             |
| C    | -1.49867000 | -2.04333000 | 0.62480200  |
| C    | -0.07459000 | -1.46991800 | 0.78694100  |
| C    | 0.30600300  | -0.57633600 | -0.35838000 |
| C    | -0.71806600 | 0.45253700  | -0.76048700 |
| C    | -2.13034000 | -0.12057100 | -0.89592200 |
| C    | -2.52645700 | -0.94333200 | 0.33613700  |
| H    | -0.03055400 | -0.88311400 | 1.71771000  |
| H    | 0.64705600  | -2.28034200 | 0.90403700  |
| H    | -1.49919900 | -2.76825300 | -0.19834200 |
| H    | -1.77201900 | -2.59398700 | 1.52978000  |
| H    | -0.40821400 | 0.96376300  | -1.67765300 |
| H    | -2.82816400 | 0.70296300  | -1.06327200 |
| H    | -2.15149900 | -0.75132200 | -1.79306400 |
| H    | -2.60282700 | -0.27636600 | 1.20095800  |
| H    | -3.51759200 | -1.38182700 | 0.18573100  |
| H    | 1.14274100  | 1.51836800  | 1.33924300  |
| C    | 1.59104600  | -0.49125200 | -0.88842600 |
| H    | 1.67817800  | 0.03346100  | -1.83602100 |
| O    | 2.28972500  | 1.09243900  | -0.05386500 |
| O    | 2.02776800  | 1.11253300  | 1.31346800  |
| O    | -0.67041200 | 1.43693900  | 0.32146700  |
| O    | -1.46355800 | 2.58967100  | -0.05877300 |
| H    | -0.77370600 | 3.17684700  | -0.40176300 |
| C    | 2.67827800  | -1.48876500 | -0.59690700 |
| H    | 3.62619100  | -1.13686100 | -1.00377200 |
| H    | 2.80571900  | -1.62747000 | 0.47778500  |
| H    | 2.45247800  | -2.46270700 | -1.04628400 |
| P18  |             |             |             |
| C    | 1.29964900  | 0.51740100  | 1.09924500  |
| C    | 0.53778000  | -0.65553200 | 0.46803400  |
| C    | -0.84385800 | -0.24572200 | -0.00223600 |
| C    | -0.85933400 | 0.98172100  | -0.88489000 |
| C    | -0.10347900 | 2.15571000  | -0.22977000 |
| C    | 1.31587600  | 1.74794400  | 0.18405100  |
| H    | 0.46722000  | -1.48908000 | 1.17643800  |
| H    | 0.80507200  | 0.76021500  | 2.04758300  |
| H    | 2.31459200  | 0.19177600  | 1.33640500  |
| H    | -0.36575400 | 0.73311200  | -1.83214500 |
| H    | -1.88022400 | 1.28035700  | -1.12868400 |

|     |             |             |             |
|-----|-------------|-------------|-------------|
| H   | -0.06943300 | 3.00220400  | -0.92305300 |
| H   | -0.66050900 | 2.49180400  | 0.65369900  |
| H   | 1.90489800  | 1.51871000  | -0.70995000 |
| H   | 1.81768000  | 2.57914400  | 0.68933400  |
| C   | -1.91100600 | -0.94465400 | 0.40011000  |
| H   | -1.72618400 | -1.80982400 | 1.03545000  |
| O   | 1.19765300  | -1.13398300 | -0.72676600 |
| O   | 2.52380000  | -1.60663100 | -0.35549500 |
| H   | 2.39802900  | -2.55870500 | -0.46672300 |
| C   | -3.35765800 | -0.69591400 | 0.08834700  |
| H   | -3.51922800 | 0.19186300  | -0.52328500 |
| H   | -3.78749800 | -1.55163300 | -0.44484400 |
| H   | -3.93811000 | -0.58075400 | 1.01052600  |
| R19 |             |             |             |
| C   | -1.67908100 | -2.25867700 | 0.40586900  |
| C   | -0.33888100 | -1.57790900 | 0.75161500  |
| C   | 0.03317200  | -0.50372800 | -0.22409200 |
| C   | -1.05022000 | 0.42735400  | -0.68050100 |
| C   | -2.37899300 | -0.26702100 | -0.98040800 |
| C   | -2.78427600 | -1.23117200 | 0.13941500  |
| H   | -0.42575500 | -1.12556000 | 1.75460500  |
| H   | 0.45293600  | -2.32540300 | 0.83337700  |
| H   | -1.54271800 | -2.88518400 | -0.48411300 |
| H   | -1.96606800 | -2.92839100 | 1.22202000  |
| H   | -0.71075800 | 1.01640900  | -1.53884900 |
| H   | -3.14082800 | 0.49918200  | -1.14204600 |
| H   | -2.26680000 | -0.81501300 | -1.92405900 |
| H   | -2.98250900 | -0.65821700 | 1.05143400  |
| H   | -3.71721700 | -1.73766100 | -0.12559200 |
| H   | 0.53346100  | 1.63695000  | 1.24873200  |
| C   | 1.44802700  | -0.10073800 | -0.55134300 |
| H   | 1.55473200  | -0.04413300 | -1.64647800 |
| O   | 1.66298000  | 1.29553000  | -0.21725900 |
| O   | 1.49190600  | 1.45919000  | 1.21688500  |
| O   | -1.21435500 | 1.37082500  | 0.43568900  |
| O   | -2.04021100 | 2.48396700  | -0.00025600 |
| H   | -1.36107200 | 3.12351600  | -0.26212200 |
| C   | 2.56048500  | -0.98806900 | 0.00838100  |
| H   | 2.36943900  | -2.02072400 | -0.30333800 |
| H   | 2.50802000  | -0.96543600 | 1.09974300  |
| C   | 3.95177700  | -0.55307400 | -0.45769400 |
| H   | 4.15179200  | 0.47835100  | -0.16372300 |
| H   | 4.72443200  | -1.19046900 | -0.02066400 |

|      |             |             |             |
|------|-------------|-------------|-------------|
| H    | 4.04429500  | -0.61610500 | -1.54684100 |
| TS19 |             |             |             |
| C    | -1.57217400 | -2.18880400 | 0.63820500  |
| C    | -0.28323500 | -1.38859500 | 0.92405200  |
| C    | 0.08770600  | -0.49234200 | -0.22243100 |
| C    | -1.02814800 | 0.34414900  | -0.79127500 |
| C    | -2.30872700 | -0.45201900 | -1.05088200 |
| C    | -2.71630400 | -1.28042200 | 0.17378800  |
| H    | -0.44169700 | -0.76546900 | 1.81800200  |
| H    | 0.53621300  | -2.06685300 | 1.16839900  |
| H    | -1.36244300 | -2.93647200 | -0.13645200 |
| H    | -1.86273100 | -2.73994600 | 1.53751800  |
| H    | -0.69476000 | 0.86578600  | -1.69403700 |
| H    | -3.10071200 | 0.24245700  | -1.34029300 |
| H    | -2.12579700 | -1.11121300 | -1.90828100 |
| H    | -2.99857000 | -0.60191700 | 0.98529200  |
| H    | -3.60194100 | -1.87833800 | -0.06158100 |
| H    | 0.38819200  | 1.75949900  | 1.44051000  |
| C    | 1.39841200  | -0.22931900 | -0.61298200 |
| H    | 1.51981600  | 0.26084500  | -1.57647600 |
| O    | 1.72777400  | 1.49242700  | 0.18748800  |
| O    | 1.32828100  | 1.51751700  | 1.52165900  |
| O    | -1.26147800 | 1.36040400  | 0.23570700  |
| O    | -2.16569500 | 2.36236400  | -0.29371200 |
| H    | -1.53462100 | 3.03633700  | -0.58678600 |
| C    | 2.58459700  | -1.03368700 | -0.13900300 |
| H    | 2.61967400  | -0.99167800 | 0.95361000  |
| H    | 2.42909200  | -2.08750300 | -0.40549700 |
| C    | 3.91294900  | -0.54376700 | -0.71988800 |
| H    | 4.74791500  | -1.13713100 | -0.33919600 |
| H    | 3.92083600  | -0.62116200 | -1.81181100 |
| H    | 4.08001800  | 0.49990200  | -0.44956900 |
| P19  |             |             |             |
| C    | 1.88151900  | 0.28923100  | 1.03018200  |
| C    | 0.80046900  | -0.66963900 | 0.51341000  |
| C    | -0.45843100 | 0.06780400  | 0.10078700  |
| C    | -0.21646200 | 1.21464800  | -0.85455700 |
| C    | 0.85923500  | 2.17879900  | -0.31376200 |
| C    | 2.15066800  | 1.43313700  | 0.04466700  |
| H    | 0.56754300  | -1.42566500 | 1.27213400  |
| H    | 1.53408900  | 0.69241000  | 1.98914000  |
| H    | 2.79218700  | -0.27992500 | 1.22818600  |
| H    | 0.13283600  | 0.80178200  | -1.80854700 |
| H    | -1.13977200 | 1.75764700  | -1.06271000 |

|   |             |             |             |
|---|-------------|-------------|-------------|
| H | 1.06243900  | 2.95577800  | -1.05763800 |
| H | 0.46950100  | 2.68685600  | 0.57713500  |
| H | 2.59801600  | 1.02068700  | -0.86555500 |
| H | 2.88299000  | 2.12551200  | 0.47166700  |
| C | -1.63791800 | -0.30338200 | 0.61193900  |
| H | -1.63954900 | -1.16047400 | 1.28579900  |
| O | 1.22819900  | -1.35257300 | -0.68738200 |
| O | 2.40983600  | -2.13992300 | -0.36614000 |
| H | 2.03447500  | -3.02967000 | -0.41226400 |
| C | -2.99535100 | 0.29473800  | 0.36830400  |
| H | -2.92413900 | 1.20243000  | -0.23472500 |
| H | -3.42463600 | 0.59726200  | 1.33212400  |
| C | -3.95767600 | -0.69721800 | -0.30856200 |
| H | -4.06751900 | -1.60891300 | 0.28616500  |
| H | -4.95102000 | -0.25711900 | -0.43179500 |
| H | -3.58804100 | -0.98734100 | -1.29539000 |

#### R20

|   |             |             |             |
|---|-------------|-------------|-------------|
| C | 1.73598200  | 2.40869500  | 0.39925600  |
| C | 0.49857600  | 1.55173100  | 0.73608200  |
| C | 0.28855700  | 0.43213100  | -0.23687000 |
| C | 1.49473100  | -0.34417900 | -0.67431300 |
| C | 2.71958600  | 0.52378000  | -0.96434300 |
| C | 2.97512700  | 1.54170100  | 0.15229600  |
| H | 0.63637800  | 1.12031400  | 1.74258600  |
| H | -0.38942800 | 2.18331200  | 0.80551400  |
| H | 1.52464100  | 3.00497400  | -0.49679500 |
| H | 1.91869100  | 3.11648200  | 1.21328600  |
| H | 1.24957200  | -0.97898100 | -1.53217800 |
| H | 3.58110500  | -0.13190700 | -1.11085900 |
| H | 2.54548600  | 1.04500800  | -1.91376100 |
| H | 3.23970900  | 1.00714500  | 1.07078200  |
| H | 3.83250600  | 2.17017000  | -0.10667600 |
| H | 0.06887100  | -1.74739900 | 1.24654100  |
| C | -1.05387200 | -0.16272300 | -0.57721900 |
| H | -1.13712400 | -0.24078200 | -1.67294600 |
| O | -1.07905300 | -1.57363600 | -0.23418200 |
| O | -0.90444700 | -1.70334300 | 1.20281200  |
| O | 1.77299500  | -1.25015800 | 0.45028000  |
| O | 2.74782000  | -2.24268300 | 0.03111400  |
| H | 2.16522500  | -2.97001100 | -0.23423500 |
| C | -2.28323700 | 0.56757600  | -0.03721500 |
| H | -2.22763100 | 1.61875800  | -0.34402000 |
| H | -2.24906000 | 0.54896400  | 1.05596200  |

|      |             |             |             |
|------|-------------|-------------|-------------|
| C    | -3.60378300 | -0.03835700 | -0.52467000 |
| H    | -3.62688100 | -1.09718100 | -0.25476100 |
| H    | -3.63827500 | 0.00182800  | -1.62070200 |
| C    | -4.82990900 | 0.67476400  | 0.05133700  |
| H    | -4.84474600 | 1.73381400  | -0.22626700 |
| H    | -5.75744100 | 0.22420900  | -0.31189800 |
| H    | -4.84066400 | 0.61913800  | 1.14419300  |
| TS20 |             |             |             |
| C    | 1.73598200  | 2.40869500  | 0.39925600  |
| C    | 0.49857600  | 1.55173100  | 0.73608200  |
| C    | 0.28855700  | 0.43213100  | -0.23687000 |
| C    | 1.49473100  | -0.34417900 | -0.67431300 |
| C    | 2.71958600  | 0.52378000  | -0.96434300 |
| C    | 2.97512700  | 1.54170100  | 0.15229600  |
| H    | 0.63637800  | 1.12031400  | 1.74258600  |
| H    | -0.38942800 | 2.18331200  | 0.80551400  |
| H    | 1.52464100  | 3.00497400  | -0.49679500 |
| H    | 1.91869100  | 3.11648200  | 1.21328600  |
| H    | 1.24957200  | -0.97898100 | -1.53217800 |
| H    | 3.58110500  | -0.13190700 | -1.11085900 |
| H    | 2.54548600  | 1.04500800  | -1.91376100 |
| H    | 3.23970900  | 1.00714500  | 1.07078200  |
| H    | 3.83250600  | 2.17017000  | -0.10667600 |
| H    | 0.06887100  | -1.74739900 | 1.24654100  |
| C    | -1.05387200 | -0.16272300 | -0.57721900 |
| H    | -1.13712400 | -0.24078200 | -1.67294600 |
| O    | -1.07905300 | -1.57363600 | -0.23418200 |
| O    | -0.90444700 | -1.70334300 | 1.20281200  |
| O    | 1.77299500  | -1.25015800 | 0.45028000  |
| O    | 2.74782000  | -2.24268300 | 0.03111400  |
| H    | 2.16522500  | -2.97001100 | -0.23423500 |
| C    | -2.28323700 | 0.56757600  | -0.03721500 |
| H    | -2.22763100 | 1.61875800  | -0.34402000 |
| H    | -2.24906000 | 0.54896400  | 1.05596200  |
| C    | -3.60378300 | -0.03835700 | -0.52467000 |
| H    | -3.62688100 | -1.09718100 | -0.25476100 |
| H    | -3.63827500 | 0.00182800  | -1.62070200 |
| C    | -4.82990900 | 0.67476400  | 0.05133700  |
| H    | -4.84474600 | 1.73381400  | -0.22626700 |
| H    | -5.75744100 | 0.22420900  | -0.31189800 |
| H    | -4.84066400 | 0.61913800  | 1.14419300  |
| TS20 |             |             |             |
| C    | 1.67131600  | 2.31276200  | 0.64969500  |
| C    | 0.50101300  | 1.34898900  | 0.94120900  |

|     |             |             |             |
|-----|-------------|-------------|-------------|
| C   | 0.23654000  | 0.42143500  | -0.20974200 |
| C   | 1.44501900  | -0.25778500 | -0.79847400 |
| C   | 2.60742100  | 0.70101400  | -1.06444400 |
| C   | 2.91832100  | 1.56518300  | 0.16377700  |
| H   | 0.74977900  | 0.74451300  | 1.82737700  |
| H   | -0.39712500 | 1.91221000  | 1.20076200  |
| H   | 1.35680400  | 3.03359000  | -0.11489800 |
| H   | 1.89848800  | 2.88916600  | 1.55141600  |
| H   | 1.17182700  | -0.81141700 | -1.70240200 |
| H   | 3.47968700  | 0.11839600  | -1.36944200 |
| H   | 2.32948900  | 1.33784000  | -1.91317800 |
| H   | 3.29637200  | 0.92251800  | 0.96541600  |
| H   | 3.71560500  | 2.27543200  | -0.07530200 |
| H   | 0.25177900  | -1.86233400 | 1.43582100  |
| C   | -1.03348100 | -0.00704000 | -0.58872300 |
| H   | -1.10086900 | -0.50097300 | -1.55553600 |
| O   | -1.12484800 | -1.76300500 | 0.19822700  |
| O   | -0.71096800 | -1.74634700 | 1.52837000  |
| O   | 1.82135900  | -1.24276800 | 0.21644000  |
| O   | 2.84193400  | -2.11417000 | -0.33215400 |
| H   | 2.30056900  | -2.86258900 | -0.62399300 |
| C   | -2.30759500 | 0.63245100  | -0.09463300 |
| H   | -2.33356300 | 0.56307400  | 0.99788500  |
| H   | -2.29006500 | 1.70405600  | -0.33792700 |
| C   | -3.57362300 | -0.00257700 | -0.68031300 |
| H   | -3.55058400 | 0.08875600  | -1.77337900 |
| H   | -3.55865800 | -1.07162800 | -0.45332600 |
| C   | -4.85883500 | 0.63032800  | -0.14212000 |
| H   | -5.74445800 | 0.15993800  | -0.57733400 |
| H   | -4.92647000 | 0.52111900  | 0.94463600  |
| H   | -4.90499200 | 1.70008100  | -0.37106100 |
| P20 |             |             |             |
| C   | 2.39534100  | 0.28630700  | 0.98257600  |
| C   | 1.29107700  | -0.67026800 | 0.51317300  |
| C   | 0.01861700  | 0.06998900  | 0.15041300  |
| C   | 0.22450800  | 1.21405600  | -0.81660100 |
| C   | 1.32501600  | 2.17577600  | -0.32350500 |
| C   | 2.62764900  | 1.42668800  | -0.01636700 |
| H   | 1.08703600  | -1.42348600 | 1.28293600  |
| H   | 2.08858900  | 0.69330300  | 1.95372100  |
| H   | 3.31154300  | -0.28525200 | 1.14489100  |
| H   | 0.53204300  | 0.79807300  | -1.78354500 |
| H   | -0.70506600 | 1.75955900  | -0.98701400 |
| H   | 1.49998000  | 2.94997200  | -1.07740600 |

|     |             |             |             |
|-----|-------------|-------------|-------------|
| H   | 0.97413100  | 2.68774300  | 0.58119900  |
| H   | 3.03593800  | 1.01029000  | -0.94300400 |
| H   | 3.37912900  | 2.11772000  | 0.37829700  |
| C   | -1.14010900 | -0.29657800 | 0.71033300  |
| H   | -1.11557600 | -1.15179100 | 1.38588700  |
| O   | 1.66707000  | -1.35790800 | -0.70224100 |
| O   | 2.85877100  | -2.14783300 | -0.42770000 |
| H   | 2.47908100  | -3.03653500 | -0.45439600 |
| C   | -2.50402300 | 0.30426500  | 0.51947500  |
| H   | -2.45444400 | 1.22301000  | -0.07072200 |
| H   | -2.90608100 | 0.58955200  | 1.50123600  |
| C   | -3.49440200 | -0.67210600 | -0.14501000 |
| H   | -3.53295800 | -1.59866600 | 0.43967000  |
| H   | -3.10917600 | -0.95036800 | -1.13177400 |
| C   | -4.90426400 | -0.09120100 | -0.28035900 |
| H   | -5.58392800 | -0.80400600 | -0.75497100 |
| H   | -5.32232700 | 0.16626300  | 0.69790500  |
| H   | -4.90111000 | 0.81898400  | -0.88816100 |
| R21 |             |             |             |
| C   | -1.40335500 | 0.23951400  | 0.76262200  |
| C   | 0.00630100  | -0.08862200 | 1.14087800  |
| C   | 1.14393800  | 0.23805300  | 0.22164900  |
| C   | 0.96691800  | 1.65149300  | -0.37793700 |
| C   | -0.45417200 | 1.91636700  | -0.89269100 |
| C   | -1.51257800 | 1.65923200  | 0.18807800  |
| H   | -2.06493100 | 0.11421800  | 1.62629900  |
| H   | 1.22306800  | 2.36810800  | 0.41036100  |
| H   | 1.70049700  | 1.78181700  | -1.17976100 |
| H   | -0.52482800 | 2.95166700  | -1.24037400 |
| H   | -0.65431700 | 1.27244300  | -1.75114700 |
| H   | -1.39294600 | 2.36878200  | 1.01464200  |
| H   | -2.52008600 | 1.79598800  | -0.21433200 |
| C   | 2.50339700  | 0.06075500  | 0.89384500  |
| H   | 2.64200600  | -0.98062500 | 1.18973800  |
| H   | 3.30537100  | 0.33954300  | 0.20599700  |
| H   | 2.57615000  | 0.68623100  | 1.78720700  |
| O   | 1.09116400  | -0.59355500 | -0.98560200 |
| O   | 1.02062900  | -1.99795500 | -0.57033800 |
| H   | 0.20162100  | -0.67369400 | 2.03126800  |
| H   | 1.55365400  | -2.39433500 | -1.27203500 |
| O   | -1.89711100 | -0.60543100 | -0.30477000 |
| O   | -1.79431700 | -1.98818000 | 0.11168800  |
| H   | -0.91087600 | -2.20993100 | -0.23434700 |



## TS21

|   |             |             |             |
|---|-------------|-------------|-------------|
| C | -1.10062700 | 0.47476100  | 0.89541900  |
| C | 0.29814200  | 0.12078500  | 1.28841400  |
| C | 1.38002600  | 0.22995200  | 0.40737300  |
| C | 1.24687800  | 1.10557500  | -0.82434700 |
| C | -0.19503900 | 1.33053600  | -1.30567000 |
| C | -1.15804200 | 1.59201200  | -0.14469000 |
| H | -1.68969100 | 0.74302100  | 1.78020600  |
| H | 1.70800600  | 2.07055100  | -0.57021300 |
| H | 1.85255100  | 0.67479500  | -1.62541200 |
| H | -0.21716900 | 2.17211400  | -2.00431100 |
| H | -0.52737200 | 0.45156300  | -1.85727800 |
| H | -0.90074500 | 2.52864800  | 0.36519900  |
| H | -2.18520400 | 1.69207800  | -0.50169100 |
| C | 2.77657600  | 0.09790300  | 0.96605500  |
| H | 2.82513200  | -0.70358300 | 1.70563600  |
| H | 3.48793100  | -0.12410700 | 0.16942800  |
| H | 3.07703900  | 1.03256100  | 1.45121000  |
| O | 1.32155800  | -1.54937100 | -0.25114300 |
| O | 0.47310300  | -1.70233500 | -1.34633500 |
| H | 0.44259600  | -0.38928000 | 2.23449700  |
| H | -0.38767200 | -1.87423400 | -0.92561700 |
| O | -1.65775400 | -0.77842000 | 0.38805600  |
| O | -3.07567100 | -0.58420100 | 0.11287000  |
| H | -3.46277200 | -1.06865400 | 0.85544800  |

## P21

|   |             |             |             |
|---|-------------|-------------|-------------|
| C | -0.86832600 | -0.38014500 | 0.57630200  |
| C | 0.46815700  | -1.03092100 | 0.35095700  |
| C | 1.57714700  | -0.36103400 | 0.01906600  |
| C | 1.57242000  | 1.13711200  | -0.19089500 |
| C | 0.16325200  | 1.71241900  | -0.36836200 |
| C | -0.78413700 | 1.14231300  | 0.68886200  |
| H | -1.34354800 | -0.80118700 | 1.46960000  |
| H | 2.07034900  | 1.61230000  | 0.66713700  |
| H | 2.19521100  | 1.37892800  | -1.06015500 |
| H | 0.19038300  | 2.80481600  | -0.32006700 |
| H | -0.21239800 | 1.44253200  | -1.36101000 |
| H | -0.42491600 | 1.39913800  | 1.69278600  |
| H | -1.79152300 | 1.55568100  | 0.59790200  |
| C | 2.90362000  | -1.05096600 | -0.14912800 |
| H | 2.83451400  | -2.12024000 | 0.05872600  |
| H | 3.28250300  | -0.92186400 | -1.16935100 |
| H | 3.65572400  | -0.61884400 | 0.52140900  |
| H | 0.49890300  | -2.11010600 | 0.46702500  |

|      |             |             |             |
|------|-------------|-------------|-------------|
| O    | -1.66539200 | -0.79548700 | -0.55550300 |
| O    | -3.06400000 | -0.53765500 | -0.21565500 |
| H    | -3.31287600 | 0.03131700  | -0.95554700 |
| R22  |             |             |             |
| C    | 2.42034900  | 1.03638200  | 0.35109600  |
| C    | 0.94185200  | 1.39842900  | 0.53028800  |
| C    | 1.69585900  | -1.06876600 | -0.82162300 |
| C    | 2.61460800  | -0.48129300 | 0.19459500  |
| H    | 0.57783300  | 0.98943500  | 1.47569500  |
| H    | 0.83123500  | 2.48650600  | 0.59285900  |
| H    | 2.81103700  | 1.54355800  | -0.53952400 |
| H    | 3.00256100  | 1.40112200  | 1.20226700  |
| H    | -0.96560800 | -0.65606400 | 1.46948300  |
| H    | 1.95297000  | -2.01132300 | -1.29309400 |
| H    | 2.41521700  | -0.96413800 | 1.16655300  |
| H    | 3.65553200  | -0.71401900 | -0.05228600 |
| C    | -1.38668500 | 1.31995100  | -0.53608100 |
| H    | -1.42840200 | 2.39303900  | -0.32103100 |
| H    | -1.93572800 | 1.13374500  | -1.46090000 |
| O    | -0.60502200 | -1.50865300 | -0.16810700 |
| O    | -0.34140000 | -1.37550700 | 1.25297000  |
| C    | 0.08217300  | 0.88410100  | -0.64324000 |
| H    | 0.45721400  | 1.39036700  | -1.54526400 |
| C    | 0.28200100  | -0.62144100 | -0.94068600 |
| H    | -0.10339800 | -0.84117500 | -1.94388400 |
| O    | -2.11368500 | 0.68042600  | 0.53066700  |
| O    | -3.03357100 | -0.28644400 | -0.03578500 |
| H    | -2.42197200 | -1.03381200 | -0.19493800 |
| TS22 |             |             |             |
| C    | 2.43296500  | -1.07173600 | -0.45281300 |
| C    | 0.95225000  | -1.44947900 | -0.58681300 |
| C    | 1.61808200  | 1.04648900  | 0.67952900  |
| C    | 2.62483600  | 0.44008700  | -0.24805100 |
| H    | 0.51468800  | -0.98979800 | -1.47762100 |
| H    | 0.85170900  | -2.53236900 | -0.70878800 |
| H    | 2.86031500  | -1.60701800 | 0.40336500  |
| H    | 2.99206000  | -1.39798700 | -1.33427800 |
| H    | -0.32510200 | 3.24024000  | -0.56728700 |
| H    | 1.80881700  | 2.04862000  | 1.05190600  |
| H    | 2.54144200  | 0.95613000  | -1.21771400 |
| H    | 3.63857600  | 0.65761000  | 0.10688400  |
| C    | -1.28672100 | -1.52939500 | 0.67628900  |
| H    | -1.23247900 | -2.62345600 | 0.72033700  |

|   |             |             |             |
|---|-------------|-------------|-------------|
| H | -1.82423100 | -1.17566300 | 1.56134900  |
| O | -0.56563200 | 1.38397500  | -0.55533400 |
| O | -0.93529800 | 2.66153400  | -0.08923500 |
| C | 0.15912200  | -0.99694200 | 0.65009900  |
| H | 0.61804500  | -1.48164800 | 1.52920600  |
| C | 0.36863500  | 0.48264500  | 0.91007700  |
| H | -0.26663600 | 0.94157400  | 1.66026700  |
| O | -2.07216300 | -1.26490400 | -0.47507800 |
| O | -2.83121900 | -0.05351900 | -0.25562700 |
| H | -2.15772500 | 0.61706300  | -0.49534400 |

# P22

|   |             |             |             |
|---|-------------|-------------|-------------|
| C | 2.15526200  | -1.07916700 | -0.11008000 |
| C | 0.63499100  | -1.26604300 | -0.05222600 |
| C | -0.01837000 | -0.21200600 | 0.86040500  |
| C | 0.54688900  | 1.16813900  | 0.60325500  |
| C | 1.66829900  | 1.39542000  | -0.07909200 |
| C | 2.52188500  | 0.30268600  | -0.67009500 |
| H | 0.38425600  | -2.26971000 | 0.30638700  |
| H | 2.61265000  | -1.86631900 | -0.71687700 |
| H | 1.99927300  | 2.41962100  | -0.23139200 |
| H | 3.57993000  | 0.51908300  | -0.48257600 |
| C | -1.54787000 | -0.23109500 | 0.77611900  |
| H | -0.01204200 | 2.00765300  | 1.01050800  |
| H | -1.98467100 | 0.48777900  | 1.48193500  |
| H | -1.93455600 | -1.22972800 | 1.00919800  |
| H | 0.19939000  | -0.47681600 | 1.90724200  |
| H | 0.21397000  | -1.17197300 | -1.05760500 |
| H | 2.57055300  | -1.17899900 | 0.90017000  |
| H | 2.40943100  | 0.30920600  | -1.76333400 |
| O | -1.91519100 | 0.12136400  | -0.55448500 |
| O | -3.36143200 | 0.01015600  | -0.63452600 |
| H | -3.59171100 | 0.93043800  | -0.82129100 |

# R23

|   |             |             |             |
|---|-------------|-------------|-------------|
| C | -0.91210400 | 1.47885100  | -0.23422100 |
| C | 0.41490400  | 1.71440500  | -0.96738900 |
| C | 0.29251800  | -0.11506900 | 1.26567700  |
| C | -0.97492000 | 0.12673100  | 0.50449500  |
| H | 0.51713500  | 1.00132500  | -1.78937200 |
| H | 0.41336300  | 2.71483700  | -1.41046800 |
| H | -1.06445700 | 2.26754200  | 0.51127600  |
| H | -1.75829100 | 1.53479400  | -0.92431800 |
| H | 0.79317300  | -2.19633400 | -0.30086400 |
| H | 0.24192900  | -0.62168200 | 2.22170300  |

|      |             |             |             |
|------|-------------|-------------|-------------|
| O    | 1.94152700  | -0.71933800 | -0.44209200 |
| O    | 1.71694600  | -2.08462300 | -0.01853700 |
| C    | 1.62170100  | 1.56100400  | -0.03123900 |
| H    | 1.60151300  | 2.32896300  | 0.74990800  |
| C    | 1.62120500  | 0.18276700  | 0.64684900  |
| H    | 2.41273200  | 0.10828500  | 1.39997600  |
| H    | 2.55971900  | 1.68059700  | -0.58060700 |
| C    | -2.21608800 | 0.00542700  | 1.38496400  |
| H    | -3.11917800 | 0.10988200  | 0.78237700  |
| H    | -2.23601200 | -0.97243800 | 1.87111300  |
| H    | -2.21577500 | 0.78070300  | 2.15526000  |
| O    | -0.96171100 | -0.99003600 | -0.45985500 |
| O    | -2.13523100 | -0.92858400 | -1.32208100 |
| H    | -1.72139800 | -0.68052800 | -2.16028100 |
| TS23 |             |             |             |
| C    | -1.66547600 | 1.19972600  | -0.22834200 |
| C    | -0.46245600 | 1.91820800  | -0.85451200 |
| C    | -0.05413100 | -0.18683500 | 1.09314600  |
| C    | -1.29560000 | -0.21986700 | 0.23769100  |
| H    | -0.16090200 | 1.37631200  | -1.75294500 |
| H    | -0.75017700 | 2.92612100  | -1.16709600 |
| H    | -2.04607800 | 1.75628300  | 0.63564700  |
| H    | -2.48342400 | 1.12461500  | -0.95073700 |
| H    | 3.05523100  | -1.66560900 | 0.32923200  |
| H    | 0.09082300  | -0.98952300 | 1.80761200  |
| O    | 1.99110200  | -0.30342700 | -0.41263700 |
| O    | 3.18075300  | -0.71294200 | 0.20862700  |
| C    | 0.72498400  | 1.99948400  | 0.11355500  |
| H    | 0.53187300  | 2.76569700  | 0.87816700  |
| C    | 0.98031000  | 0.71266900  | 0.85529500  |
| H    | 1.80082600  | 0.73248900  | 1.56438600  |
| C    | -2.44158400 | -0.94390700 | 0.93731500  |
| H    | -3.33293600 | -0.93206500 | 0.30656500  |
| H    | -2.16185000 | -1.98372900 | 1.11940100  |
| H    | -2.68087600 | -0.47229200 | 1.89503900  |
| H    | 1.63693800  | 2.30305900  | -0.40536500 |
| O    | -1.01170200 | -0.88638700 | -1.03276400 |
| O    | -0.26680000 | -2.10664100 | -0.80486200 |
| H    | 0.63744100  | -1.74306100 | -0.85169700 |
| P23  |             |             |             |
| C    | -1.68599100 | -0.76742600 | -0.82689400 |
| C    | -0.51567500 | -1.35997400 | -0.03593900 |
| C    | 0.55997800  | -0.31020200 | 0.28601000  |
| C    | -0.06177200 | 1.00028600  | 0.72426300  |

|     |             |             |             |
|-----|-------------|-------------|-------------|
| C   | -1.35713700 | 1.28781400  | 0.59077100  |
| C   | -2.36208300 | 0.36370600  | -0.04289900 |
| H   | -0.04281700 | -2.17622300 | -0.58916700 |
| H   | -2.41234100 | -1.54820700 | -1.07017500 |
| H   | -1.73023400 | 2.23671800  | 0.96939400  |
| H   | -3.02892400 | 0.93786200  | -0.69587200 |
| C   | 1.56388700  | -0.81964800 | 1.32069500  |
| H   | 0.60585400  | 1.71575500  | 1.19440200  |
| H   | 2.38902800  | -0.11268400 | 1.41995900  |
| H   | 1.08635000  | -0.93914300 | 2.29689600  |
| H   | 1.97014000  | -1.78379500 | 1.00549200  |
| H   | -0.87385600 | -1.77669900 | 0.91202400  |
| H   | -1.30562400 | -0.37567600 | -1.77459900 |
| H   | -3.00888700 | -0.05007600 | 0.74445100  |
| O   | 1.23646200  | -0.15760000 | -0.99942400 |
| O   | 2.23249700  | 0.89183700  | -0.90163500 |
| H   | 1.75239300  | 1.63092900  | -1.30037600 |
| R24 |             |             |             |
| C   | 1.79453200  | 1.05261500  | -0.02729700 |
| C   | 1.18217100  | -0.33232000 | 0.23692100  |
| C   | -0.56157600 | 1.99550700  | 0.00529600  |
| C   | 0.77846300  | 2.02887600  | -0.64751700 |
| H   | 2.16470600  | 1.44386700  | 0.92597900  |
| H   | 2.65721600  | 0.94537900  | -0.69009500 |
| H   | -3.66377600 | -0.45589800 | 0.12756600  |
| H   | -1.25185600 | 2.81412600  | -0.16917800 |
| H   | 0.65691600  | 1.77230600  | -1.71141000 |
| H   | 1.17738900  | 3.04948800  | -0.63340800 |
| O   | -1.93526100 | 0.12106100  | -0.38132600 |
| O   | -2.79915300 | -0.85664800 | 0.29131200  |
| C   | -0.03450600 | -0.18930700 | 1.16933800  |
| H   | 0.32239500  | 0.18474100  | 2.13479100  |
| C   | -1.10532800 | 0.76883400  | 0.64708900  |
| H   | -1.79845300 | 1.03121100  | 1.45394700  |
| C   | 2.19914200  | -1.32166200 | 0.80255900  |
| H   | 2.53318900  | -1.02145000 | 1.79990700  |
| H   | 1.75015100  | -2.31420100 | 0.86889400  |
| H   | 3.06938900  | -1.38119800 | 0.14491500  |
| H   | -0.48819000 | -1.16367800 | 1.35552000  |
| O   | 0.78797300  | -0.74496000 | -1.09233700 |
| O   | -0.02116400 | -1.94226600 | -1.02732100 |
| H   | -0.90563000 | -1.53743100 | -1.04838100 |

TS24

|     |             |             |             |
|-----|-------------|-------------|-------------|
| C   | 1.76020900  | 1.13624000  | -0.18689400 |
| C   | 1.27174100  | -0.26709900 | 0.20888600  |
| C   | -0.63704400 | 1.92213900  | 0.03931000  |
| C   | 0.62745600  | 2.01101300  | -0.75173000 |
| H   | 2.19169700  | 1.60654800  | 0.70278900  |
| H   | 2.56178700  | 1.04248700  | -0.92410000 |
| H   | -3.84154100 | -0.12703300 | -0.14044900 |
| H   | -1.38919600 | 2.69081200  | -0.10780600 |
| H   | 0.40840300  | 1.69539800  | -1.78174700 |
| H   | 0.95156800  | 3.05533400  | -0.82291000 |
| O   | -1.99407600 | -0.24990200 | -0.41456400 |
| O   | -3.15458700 | -0.68211300 | 0.25567400  |
| C   | 0.13049700  | -0.14914900 | 1.23560500  |
| H   | 0.55671600  | 0.19688300  | 2.18585900  |
| C   | -0.94963700 | 0.81796400  | 0.82317500  |
| H   | -1.79947900 | 0.89237800  | 1.49200900  |
| H   | -0.29965100 | -1.13204100 | 1.43024300  |
| C   | 2.40078100  | -1.15273300 | 0.73195300  |
| H   | 2.02668100  | -2.16306200 | 0.90593600  |
| H   | 3.20349400  | -1.20740100 | -0.00679800 |
| H   | 2.81123700  | -0.76387700 | 1.66828400  |
| O   | 0.78813100  | -0.78490700 | -1.05028700 |
| O   | 0.08773200  | -2.03460600 | -0.84489800 |
| H   | -0.82334600 | -1.68444600 | -0.77054300 |
| P24 |             |             |             |
| C   | 0.51615900  | -1.41723900 | -0.12308800 |
| C   | -0.56505200 | -0.38786400 | 0.24540500  |
| C   | 0.02299300  | 0.69690600  | 1.16368300  |
| C   | 1.40926000  | 1.14017600  | 0.77160900  |
| C   | 2.17508600  | 0.48659600  | -0.10041300 |
| C   | 1.74091000  | -0.77720700 | -0.79275300 |
| H   | 0.07940500  | -2.18128300 | -0.77183600 |
| H   | 3.15968200  | 0.87532900  | -0.34680500 |
| H   | 2.56783900  | -1.49626300 | -0.80651800 |
| H   | 1.78377500  | 2.04571400  | 1.24213300  |
| H   | 0.03244100  | 0.32068400  | 2.19486100  |
| H   | 0.81846600  | -1.91285300 | 0.80539400  |
| H   | 1.51801200  | -0.55542900 | -1.84305900 |
| H   | -0.66342800 | 1.54889500  | 1.17272600  |
| C   | -1.79749600 | -1.04851100 | 0.86034400  |
| H   | -2.56524200 | -0.30179100 | 1.06995200  |
| H   | -2.21308800 | -1.78309200 | 0.16683000  |
| H   | -1.54024800 | -1.55469600 | 1.79462000  |
| O   | -0.90588900 | 0.16235200  | -1.05318700 |

|      |             |             |             |
|------|-------------|-------------|-------------|
| O    | -1.91674400 | 1.19629000  | -0.90233800 |
| H    | -1.40770900 | 1.96850500  | -1.18282000 |
| R25  |             |             |             |
| C    | -1.82058900 | -0.25780300 | 0.31003200  |
| C    | -0.68478500 | 0.70308500  | 0.70597600  |
| C    | -0.04301700 | -2.02603500 | -0.10588000 |
| C    | -1.29074700 | -1.38306700 | -0.61097500 |
| H    | -2.14743800 | -0.72346300 | 1.24860900  |
| H    | 3.53375800  | -0.08025400 | -0.80080600 |
| H    | 0.17663400  | -3.05764900 | -0.35560400 |
| H    | -1.09183800 | -0.94438800 | -1.60198600 |
| H    | -2.07146100 | -2.13557500 | -0.76151700 |
| O    | 1.74744600  | -0.69416200 | -0.68883000 |
| O    | 2.81223300  | 0.22701200  | -0.23627900 |
| C    | 0.48691700  | -0.04756300 | 1.34851900  |
| H    | 0.13900700  | -0.48146200 | 2.29240000  |
| C    | 1.03994300  | -1.18606700 | 0.48386800  |
| H    | 1.74489700  | -1.79053800 | 1.06624500  |
| H    | 1.28643600  | 0.64894600  | 1.60020300  |
| H    | -1.06359700 | 1.44995600  | 1.41629000  |
| C    | -3.01923700 | 0.46731600  | -0.30990800 |
| H    | -3.82823800 | -0.23684300 | -0.52536000 |
| H    | -3.40994800 | 1.22863700  | 0.37120000  |
| H    | -2.73721200 | 0.96460500  | -1.23946900 |
| O    | -0.31632500 | 1.37424200  | -0.50421600 |
| O    | 0.74761200  | 2.31294400  | -0.22000400 |
| H    | 1.53036300  | 1.77853800  | -0.44537100 |
| TS25 |             |             |             |
| C    | -1.88931300 | -0.42777900 | 0.26727700  |
| C    | -0.90985900 | 0.67987300  | 0.69637500  |
| C    | 0.18985300  | -1.83722700 | -0.16016300 |
| C    | -1.16955200 | -1.44484800 | -0.64474600 |
| H    | -2.17523500 | -0.94673700 | 1.19096800  |
| H    | 3.72319300  | -0.72229200 | -0.88234500 |
| H    | 0.64157400  | -2.73192600 | -0.57730600 |
| H    | -1.06468800 | -1.01117200 | -1.65053500 |
| H    | -1.79176900 | -2.33849400 | -0.77150500 |
| O    | 2.00783600  | -0.02842500 | -0.60321500 |
| O    | 3.35938000  | -0.11727400 | -0.22014400 |
| C    | 0.28977500  | 0.08763700  | 1.44339000  |
| H    | -0.06574900 | -0.30710500 | 2.40414300  |
| C    | 0.95139000  | -1.02735000 | 0.67475300  |
| H    | 1.84900900  | -1.44723100 | 1.11385400  |

|     |             |             |             |
|-----|-------------|-------------|-------------|
| H   | 1.01272100  | 0.86869100  | 1.67760300  |
| C   | -3.15852300 | 0.12574500  | -0.38811400 |
| H   | -3.69026300 | 0.79506600  | 0.29396200  |
| H   | -2.91557300 | 0.69028400  | -1.29014600 |
| H   | -3.84060700 | -0.68495200 | -0.66081900 |
| H   | -1.41511400 | 1.41151400  | 1.33994400  |
| O   | -0.53444700 | 1.31554900  | -0.52974400 |
| O   | 0.49591100  | 2.29829400  | -0.27929100 |
| H   | 1.28043700  | 1.74289500  | -0.46129300 |
| P25 |             |             |             |
| C   | 0.56003500  | 0.21793000  | 0.61484000  |
| C   | -0.83062900 | 0.85572700  | 0.45604700  |
| C   | -1.62524400 | 0.14226600  | -0.65393400 |
| C   | -1.52108200 | -1.35804300 | -0.57190500 |
| C   | -0.59416700 | -1.98867700 | 0.14762000  |
| C   | 0.46231400  | -1.27328600 | 0.95003700  |
| H   | 1.12890700  | 0.74377400  | 1.39005600  |
| H   | -0.57871500 | -3.07517200 | 0.17069000  |
| H   | 1.44450300  | -1.72982900 | 0.79314200  |
| H   | -2.24266100 | -1.93702300 | -1.14234600 |
| H   | -1.27173300 | 0.47979700  | -1.63694800 |
| H   | -1.34343800 | 0.65799700  | 1.40611400  |
| H   | 0.25951200  | -1.38406200 | 2.02400500  |
| H   | -2.67723600 | 0.44489100  | -0.59483700 |
| C   | -0.76623600 | 2.37135000  | 0.24527800  |
| H   | -1.77215200 | 2.79499900  | 0.17276500  |
| H   | -0.25559800 | 2.86338700  | 1.07824100  |
| H   | -0.22423900 | 2.61488700  | -0.67046000 |
| O   | 1.21910200  | 0.44485700  | -0.64055700 |
| O   | 2.62126000  | 0.09521400  | -0.48053100 |
| H   | 2.70001200  | -0.59781500 | -1.14961700 |
| R26 |             |             |             |
| C   | 1.76539000  | -0.27313900 | 0.29177000  |
| C   | 1.18396100  | -1.35586600 | -0.63672400 |
| C   | -0.52347200 | -0.05384600 | 1.29304300  |
| C   | 0.65311200  | 0.69672400  | 0.76189800  |
| H   | 0.84157100  | -0.88892100 | -1.56343500 |
| H   | 2.10889300  | -0.76439100 | 1.21192400  |
| H   | -2.27116100 | 1.04760600  | -0.39512800 |
| H   | -1.00476100 | 0.27464900  | 2.20496100  |
| H   | 1.04416000  | 1.39205200  | 1.51323800  |
| O   | -1.73688900 | -0.73539600 | -0.71335600 |
| O   | -2.77333900 | 0.21313000  | -0.36244200 |



|      |             |             |             |
|------|-------------|-------------|-------------|
| C    | 0.02012900  | -2.12401900 | 0.00663700  |
| H    | 0.37826300  | -2.70271800 | 0.86538600  |
| C    | -1.09315000 | -1.18700300 | 0.50145100  |
| H    | -1.83187300 | -1.73621100 | 1.09448200  |
| H    | -0.41308500 | -2.83397900 | -0.70366500 |
| H    | 1.97968200  | -2.05860800 | -0.90474000 |
| C    | 2.96035500  | 0.45748700  | -0.33204400 |
| H    | 3.35439500  | 1.22244300  | 0.34366500  |
| H    | 3.76761700  | -0.24881500 | -0.54494200 |
| H    | 2.68141600  | 0.94664000  | -1.26718900 |
| O    | 0.32460800  | 1.46658400  | -0.42229600 |
| O    | -0.79458800 | 2.34277000  | -0.06769800 |
| H    | -0.59140900 | 3.09152300  | -0.64439000 |
| TS26 |             |             |             |
| C    | 1.85027900  | -0.45707500 | 0.28238600  |
| C    | 1.09510500  | -1.36783100 | -0.70352100 |
| C    | -0.37454000 | 0.12878600  | 1.29647300  |
| C    | 0.91194200  | 0.67573900  | 0.74519600  |
| H    | 0.84121300  | -0.78462800 | -1.59178300 |
| H    | 2.08602300  | -1.03742600 | 1.18475600  |
| H    | -3.59377400 | 0.74336200  | -0.00227300 |
| H    | -0.90156400 | 0.70372900  | 2.04840800  |
| H    | 1.40191200  | 1.31350200  | 1.49039100  |
| O    | -2.01866800 | -0.07373600 | -0.62628800 |
| O    | -3.37145400 | -0.16185000 | -0.26508200 |
| C    | -0.18405700 | -1.96030800 | -0.09440300 |
| H    | 0.07735800  | -2.77744400 | 0.59305700  |
| C    | -0.98992100 | -0.97343400 | 0.71121700  |
| H    | -1.87584300 | -1.37249800 | 1.19309500  |
| H    | -0.82043900 | -2.39947100 | -0.86619800 |
| C    | 3.16280700  | 0.07634000  | -0.30290700 |
| H    | 3.82880700  | -0.75074500 | -0.56463500 |
| H    | 2.98009400  | 0.66838300  | -1.20133700 |
| H    | 3.68547400  | 0.71277000  | 0.41712800  |
| H    | 1.75117800  | -2.18061200 | -1.02961800 |
| O    | 0.68275100  | 1.46062500  | -0.45141900 |
| O    | -0.43461700 | 2.35680800  | -0.24780800 |
| H    | -1.15422600 | 1.77300600  | -0.55286300 |
| P26  |             |             |             |
| C    | -1.44703700 | 0.67325000  | 0.66270600  |
| C    | -0.44431900 | 1.04607900  | -0.44114400 |
| C    | 0.61495100  | -0.06210300 | -0.58305900 |
| C    | 0.00194800  | -1.44167400 | -0.60780400 |
| C    | -1.24338500 | -1.69057600 | -0.20127600 |

|   |             |             |             |
|---|-------------|-------------|-------------|
| C | -2.17506200 | -0.63688300 | 0.33426900  |
| H | -2.17134100 | 1.48206600  | 0.79937500  |
| H | -1.63200400 | -2.70437700 | -0.26550000 |
| H | -2.69208500 | -1.02098200 | 1.22099100  |
| H | 0.62511900  | -2.24693000 | -0.98306500 |
| H | -0.98397500 | 1.04779300  | -1.39784500 |
| H | -0.90505500 | 0.56539300  | 1.60787600  |
| H | -2.96587500 | -0.45508900 | -0.40798900 |
| H | 1.20206700  | 0.10247400  | -1.49448500 |
| C | 0.17326500  | 2.43398800  | -0.24053000 |
| H | 0.89200300  | 2.66466800  | -1.03210100 |
| H | -0.60537400 | 3.20199100  | -0.25844500 |
| H | 0.70019300  | 2.49923100  | 0.71279400  |
| O | 1.51558400  | 0.10001400  | 0.53556700  |
| O | 2.63745200  | -0.79759700 | 0.33667900  |
| H | 2.42988100  | -1.48806400 | 0.98144900  |

# R27

|   |             |             |             |
|---|-------------|-------------|-------------|
| C | -1.70626800 | 0.33803400  | 0.76650000  |
| C | -0.32286900 | -0.09563700 | 1.13377800  |
| C | 0.83695100  | 0.14564000  | 0.21448700  |
| C | 0.75955600  | 1.56858200  | -0.38581800 |
| C | -0.64274200 | 1.93763400  | -0.88971200 |
| C | -1.71179400 | 1.76286300  | 0.19588700  |
| H | -2.36941700 | 0.25966100  | 1.63448100  |
| H | 1.07417600  | 2.26513800  | 0.39981600  |
| H | 1.48645800  | 1.65232500  | -1.19789800 |
| H | -0.63668600 | 2.97459000  | -1.23974000 |
| H | -0.89556700 | 1.30919000  | -1.74580700 |
| H | -1.53330900 | 2.45967200  | 1.02269000  |
| H | -2.70819500 | 1.97694800  | -0.20050100 |
| C | 2.17063100  | -0.15102700 | 0.92206000  |
| H | 2.12985700  | -1.18993900 | 1.26211100  |
| H | 2.21527400  | 0.46918600  | 1.82410800  |
| O | 0.72058700  | -0.68014100 | -0.99258900 |
| O | 0.53123600  | -2.07431100 | -0.57643700 |
| H | -0.16798200 | -0.69545700 | 2.02254900  |
| H | 0.99348600  | -2.51515600 | -1.30152300 |
| O | -2.26914900 | -0.46514600 | -0.29916000 |
| O | -2.27085700 | -1.85202200 | 0.11619100  |
| H | -1.40422200 | -2.13766100 | -0.22575600 |
| C | 3.42661300  | 0.06202000  | 0.07374200  |
| H | 3.58023400  | 1.11394200  | -0.17908300 |
| H | 4.31318100  | -0.27704400 | 0.61541700  |

|      |             |             |             |
|------|-------------|-------------|-------------|
| H    | 3.36770300  | -0.50109900 | -0.86044100 |
| TS27 |             |             |             |
| C    | 1.44942500  | 0.46967000  | -0.89409000 |
| C    | 0.04605100  | 0.13898000  | -1.28890800 |
| C    | -1.03893100 | 0.26002200  | -0.41294400 |
| C    | -0.88862800 | 1.11485700  | 0.83123200  |
| C    | 0.55836600  | 1.32845200  | 1.30439000  |
| C    | 1.52086200  | 1.58737800  | 0.14366000  |
| H    | 2.04510500  | 0.72507300  | -1.77815000 |
| H    | -1.34927000 | 2.08545700  | 0.59730200  |
| H    | -1.48164300 | 0.67945900  | 1.63757200  |
| H    | 0.58759400  | 2.16584800  | 2.00780400  |
| H    | 0.88722000  | 0.44518500  | 1.85152500  |
| H    | 1.26928600  | 2.52607500  | -0.36512500 |
| H    | 2.54932400  | 1.67914400  | 0.49913900  |
| C    | -2.43247100 | 0.15353700  | -1.01471600 |
| H    | -2.42271200 | -0.67467200 | -1.73006100 |
| H    | -2.60074000 | 1.06466900  | -1.60364300 |
| O    | -0.97384800 | -1.54500900 | 0.20723800  |
| O    | -0.16724300 | -1.70265800 | 1.33331500  |
| H    | -0.10465200 | -0.36029700 | -2.23990400 |
| H    | 0.71081000  | -1.85418900 | 0.94078500  |
| O    | 1.98603800  | -0.79039500 | -0.37975300 |
| O    | 3.40514600  | -0.61559500 | -0.09801000 |
| H    | 3.78893000  | -1.10850500 | -0.83672000 |
| C    | -3.58584000 | -0.03482500 | -0.02523200 |
| H    | -3.70296800 | 0.82738700  | 0.63596000  |
| H    | -4.52629300 | -0.15901900 | -0.56838400 |
| H    | -3.42373400 | -0.92078700 | 0.58924100  |
| P27  |             |             |             |
| C    | -1.09510300 | -0.44700000 | 0.56829200  |
| C    | 0.37012500  | -0.68454100 | 0.32397200  |
| C    | 1.23799900  | 0.27992300  | -0.00140000 |
| C    | 0.79581000  | 1.71803900  | -0.17514300 |
| C    | -0.71921200 | 1.86489200  | -0.34769700 |
| C    | -1.45638000 | 1.03194400  | 0.70198400  |
| H    | -1.41909200 | -0.99902600 | 1.45790200  |
| H    | 1.13241400  | 2.29568300  | 0.69820700  |
| H    | 1.32055500  | 2.15330600  | -1.03358400 |
| H    | -1.00808900 | 2.91803100  | -0.28450300 |
| H    | -1.00417000 | 1.51118400  | -1.34424400 |
| H    | -1.18193000 | 1.36929700  | 1.70887000  |
| H    | -2.54090500 | 1.13627200  | 0.61839500  |
| C    | 2.71660500  | 0.03809400  | -0.20582300 |

|   |             |             |             |
|---|-------------|-------------|-------------|
| H | 2.96711400  | 0.34353100  | -1.23083100 |
| H | 3.26392000  | 0.74144000  | 0.43713800  |
| H | 0.69683900  | -1.71363000 | 0.41890800  |
| O | -1.74850500 | -1.06274700 | -0.56477900 |
| O | -3.15849600 | -1.22627000 | -0.21429300 |
| H | -3.56847900 | -0.73951800 | -0.94100000 |
| C | 3.23140000  | -1.38018400 | 0.03972700  |
| H | 4.30994100  | -1.42666400 | -0.13010700 |
| H | 3.04135700  | -1.70376800 | 1.06651900  |
| H | 2.75907000  | -2.10100500 | -0.63257200 |

# R28

|   |             |             |             |
|---|-------------|-------------|-------------|
| C | 2.27041800  | 1.39523700  | 0.46276400  |
| C | 0.75116200  | 1.34482800  | 0.66818200  |
| C | 2.10099000  | -0.70553100 | -0.90673000 |
| C | 2.85341200  | 0.00399500  | 0.16614200  |
| H | 0.52313000  | 0.76937400  | 1.56842100  |
| H | 0.37838000  | 2.35850300  | 0.83802200  |
| H | 2.49857600  | 2.06717600  | -0.37367000 |
| H | 2.75230800  | 1.82044300  | 1.34804600  |
| H | -0.47906000 | -1.21565300 | 1.40531300  |
| H | 2.58486700  | -1.50114600 | -1.46332000 |
| H | 2.80460700  | -0.60280200 | 1.08639400  |
| H | 3.91431800  | 0.07709400  | -0.09451300 |
| C | -1.50682400 | 0.71651900  | -0.45043400 |
| H | -1.91354600 | 0.27703800  | -1.36412800 |
| O | 0.00494900  | -1.78907100 | -0.31724200 |
| O | 0.28480300  | -1.74651400 | 1.10672700  |
| C | 0.03366500  | 0.73608200  | -0.55498800 |
| H | 0.25243500  | 1.39985200  | -1.40404600 |
| C | 0.61770100  | -0.63215800 | -0.99041000 |
| H | 0.28533000  | -0.84581300 | -2.01395000 |
| O | -1.94123600 | -0.14972000 | 0.63544800  |
| O | -2.67198400 | -1.27615900 | 0.09361000  |
| H | -1.92565800 | -1.83960300 | -0.19246900 |
| C | -2.14540800 | 2.08358700  | -0.22503700 |
| H | -1.81665700 | 2.79861900  | -0.98470300 |
| H | -3.23135000 | 1.99121600  | -0.27924800 |
| H | -1.89062400 | 2.48206500  | 0.75858100  |

# TS28

|   |            |             |             |
|---|------------|-------------|-------------|
| C | 1.83206100 | -1.93806200 | -0.57856100 |
| C | 0.37181600 | -1.50274500 | -0.75784100 |
| C | 2.13545700 | 0.19764300  | 0.74694400  |
| C | 2.74689900 | -0.75131800 | -0.23587000 |

|     |             |             |             |
|-----|-------------|-------------|-------------|
| H   | 0.27656700  | -0.80752800 | -1.59625700 |
| H   | -0.24500800 | -2.37211900 | -0.99838900 |
| H   | 1.88811900  | -2.67960000 | 0.22721600  |
| H   | 2.19492000  | -2.43367600 | -1.48347400 |
| H   | 1.54829500  | 3.22565500  | -0.16731800 |
| H   | 2.78365900  | 0.92915200  | 1.22045900  |
| H   | 2.97603200  | -0.18607400 | -1.15320300 |
| H   | 3.71630800  | -1.10185700 | 0.13615200  |
| C   | -1.67206400 | -0.49124900 | 0.47937600  |
| H   | -1.90914700 | 0.21767100  | 1.27783400  |
| O   | 0.47461400  | 1.71365900  | -0.42042700 |
| O   | 0.70282300  | 2.95088000  | 0.21421400  |
| C   | -0.15469500 | -0.81880200 | 0.51598000  |
| H   | -0.05185900 | -1.53945600 | 1.34358600  |
| C   | 0.76298300  | 0.31684200  | 0.92599600  |
| H   | 0.41008800  | 0.96194300  | 1.72388800  |
| O   | -2.07858700 | 0.11154300  | -0.75579600 |
| O   | -2.21738300 | 1.53826700  | -0.58244300 |
| H   | -1.27839100 | 1.81203000  | -0.64955700 |
| C   | -2.53631800 | -1.74277900 | 0.64253100  |
| H   | -2.29453600 | -2.26830500 | 1.57047500  |
| H   | -3.58861800 | -1.45659700 | 0.66508000  |
| H   | -2.39500300 | -2.43320400 | -0.19221500 |
| P28 |             |             |             |
| C   | -2.31186900 | 1.05593600  | -0.42504300 |
| C   | -0.78169400 | 1.09899000  | -0.51941400 |
| C   | -0.13374500 | 0.35700600  | 0.66622400  |
| C   | -0.82884000 | -0.96194000 | 0.92833100  |
| C   | -2.01764900 | -1.29476100 | 0.42805500  |
| C   | -2.83185400 | -0.38749800 | -0.45747600 |
| H   | -0.43792300 | 2.13647900  | -0.54873800 |
| H   | -2.75715400 | 1.63673900  | -1.23841900 |
| H   | -2.43686000 | -2.27102100 | 0.65824500  |
| H   | -3.88408900 | -0.41920900 | -0.15202800 |
| C   | 1.39071300  | 0.15957200  | 0.52012200  |
| H   | -0.30524800 | -1.66538700 | 1.57222600  |
| H   | 1.73827000  | -0.44541500 | 1.36878600  |
| H   | -0.24545400 | 0.98041400  | 1.56679600  |
| H   | -0.45875700 | 0.62783000  | -1.45265000 |
| H   | -2.62922200 | 1.53100700  | 0.51124900  |
| H   | -2.81198500 | -0.77352500 | -1.48633600 |
| O   | 1.56308100  | -0.62284000 | -0.67106400 |
| O   | 2.94694900  | -1.06491500 | -0.71924100 |
| H   | 2.81856000  | -2.01710400 | -0.61188400 |

|      |             |             |             |
|------|-------------|-------------|-------------|
| C    | 2.19952500  | 1.45079600  | 0.45881100  |
| H    | 2.06423800  | 2.03063800  | 1.37650700  |
| H    | 3.25940300  | 1.21690900  | 0.35299900  |
| H    | 1.89846000  | 2.06508400  | -0.39196100 |
| R29  |             |             |             |
| C    | 0.16892000  | 1.78541400  | 0.01517200  |
| C    | -1.31224300 | 1.78796200  | 0.41556500  |
| C    | -0.22062400 | -0.39963600 | -1.11851700 |
| C    | 0.73315600  | 0.37544000  | -0.26172000 |
| H    | -1.43434600 | 1.30165300  | 1.38671800  |
| H    | -1.65624800 | 2.82043700  | 0.52968200  |
| H    | 0.30559000  | 2.37880800  | -0.89613100 |
| H    | 0.78396400  | 2.25496500  | 0.78780200  |
| H    | -0.55786100 | -2.09873000 | 0.89479900  |
| H    | 0.16421800  | -1.03179600 | -1.90790200 |
| O    | -2.02922000 | -1.04187400 | 0.40693200  |
| O    | -1.38828300 | -2.33856300 | 0.44950700  |
| C    | -2.18743600 | 1.05780600  | -0.61223100 |
| H    | -2.16821400 | 1.58147500  | -1.57436000 |
| C    | -1.68918400 | -0.37858800 | -0.83511400 |
| H    | -2.23594500 | -0.86782400 | -1.64811800 |
| H    | -3.22958400 | 1.02076400  | -0.28250800 |
| C    | 2.15250000  | 0.44838200  | -0.85018300 |
| H    | 2.07496000  | 0.91684600  | -1.83760600 |
| O    | 0.74821400  | -0.41889000 | 0.97897200  |
| O    | 1.64803600  | 0.18769100  | 1.95334800  |
| H    | 1.00886100  | 0.49741800  | 2.60963200  |
| C    | 2.88057700  | -0.89404200 | -0.95370300 |
| H    | 2.34818700  | -1.60682900 | -1.58929200 |
| H    | 3.87522100  | -0.75123300 | -1.38387900 |
| H    | 2.99863600  | -1.34756500 | 0.03129900  |
| H    | 2.73858600  | 1.12826500  | -0.22583200 |
| TS29 |             |             |             |
| C    | -1.11754000 | 1.48791900  | -0.24848800 |
| C    | 0.19470000  | 2.01226600  | -0.84901800 |
| C    | 0.23898600  | -0.14080000 | 1.07951100  |
| C    | -0.98361000 | 0.02410900  | 0.21117200  |
| H    | 0.42262000  | 1.43425400  | -1.74673900 |
| H    | 0.07144200  | 3.05384100  | -1.15954600 |
| H    | -1.42029200 | 2.09210700  | 0.61471200  |
| H    | -1.91863800 | 1.55640000  | -0.98801100 |
| H    | 3.08595400  | -2.08267700 | 0.34468600  |
| H    | 0.24647700  | -0.96132700 | 1.78857200  |

|     |             |             |             |
|-----|-------------|-------------|-------------|
| O   | 2.26431500  | -0.56182100 | -0.39760500 |
| O   | 3.36336200  | -1.16110500 | 0.23684600  |
| C   | 1.36494500  | 1.90436100  | 0.13604000  |
| H   | 1.27957800  | 2.68520900  | 0.90546100  |
| C   | 1.40504100  | 0.58765100  | 0.86702900  |
| H   | 2.20680900  | 0.47231000  | 1.58839800  |
| C   | -2.22318900 | -0.53839200 | 0.92468300  |
| H   | -2.01002400 | -1.59010900 | 1.14128200  |
| H   | -2.32383800 | -0.03214600 | 1.89243200  |
| H   | 2.32100300  | 2.06769100  | -0.36637800 |
| O   | -0.79019500 | -0.67142300 | -1.06141300 |
| O   | -0.23539700 | -1.98999700 | -0.83642300 |
| H   | 0.71324700  | -1.76286100 | -0.86807800 |
| C   | -3.52869300 | -0.43752600 | 0.13280500  |
| H   | -4.32994200 | -0.96921400 | 0.65225700  |
| H   | -3.85372500 | 0.59811500  | 0.00356100  |
| H   | -3.41118900 | -0.88435800 | -0.85624900 |
| P29 |             |             |             |
| C   | -1.78241300 | -0.86475900 | -0.97757900 |
| C   | -0.39732800 | -1.23752700 | -0.43847000 |
| C   | 0.34894500  | -0.02295500 | 0.13917900  |
| C   | -0.58042400 | 0.85393600  | 0.95471300  |
| C   | -1.90839100 | 0.73265800  | 0.96003700  |
| C   | -2.66283900 | -0.26542700 | 0.12435400  |
| H   | 0.21253700  | -1.68187800 | -1.22820600 |
| H   | -2.26522600 | -1.74383800 | -1.41420700 |
| H   | -2.49580000 | 1.37627900  | 1.61098400  |
| H   | -3.54911400 | 0.21172600  | -0.30879900 |
| C   | 1.57762800  | -0.41243700 | 0.98247000  |
| H   | -0.10423100 | 1.59688600  | 1.58727200  |
| H   | 2.05438500  | 0.51708400  | 1.30591400  |
| H   | 1.21876900  | -0.91297500 | 1.88904500  |
| H   | -0.49164200 | -1.98532000 | 0.35727400  |
| H   | -1.65941800 | -0.13347400 | -1.78165200 |
| H   | -3.04906000 | -1.05887900 | 0.78071600  |
| O   | 0.78448900  | 0.67264800  | -1.06954200 |
| O   | 1.41512900  | 1.92809800  | -0.70824800 |
| H   | 0.68469600  | 2.54435800  | -0.85842300 |
| C   | 2.60752700  | -1.28614900 | 0.26174300  |
| H   | 3.48937800  | -1.43032400 | 0.89139100  |
| H   | 2.21226600  | -2.27636400 | 0.02044400  |
| H   | 2.92928500  | -0.81329800 | -0.66811800 |

R30

|   |             |             |             |
|---|-------------|-------------|-------------|
| C | 1.12368700  | 1.54999600  | -0.01068900 |
| C | 0.90407300  | 0.05039500  | 0.25196000  |
| C | -1.40196800 | 1.82856100  | -0.00513800 |
| C | -0.11224400 | 2.21710800  | -0.64284500 |
| H | 1.36417700  | 2.02535000  | 0.94617600  |
| H | 1.98439900  | 1.69068000  | -0.66703900 |
| H | -3.73687500 | -1.36076000 | 0.10866400  |
| H | -2.28457400 | 2.43129900  | -0.19171800 |
| H | -0.14897800 | 1.93747300  | -1.70730500 |
| H | 0.00015300  | 3.30723100  | -0.62840700 |
| O | -2.22060000 | -0.34640000 | -0.39302500 |
| O | -2.79790400 | -1.51711300 | 0.27861300  |
| C | -0.31810100 | -0.13083600 | 1.17198200  |
| H | -0.08316100 | 0.32879800  | 2.13781600  |
| C | -1.60226300 | 0.50296400  | 0.63796000  |
| H | -2.34672300 | 0.57130900  | 1.43887500  |
| C | 2.12875600  | -0.65882400 | 0.85731300  |
| H | 2.30691300  | -0.25130200 | 1.85940300  |
| H | 1.85158900  | -1.70854000 | 0.99026800  |
| H | -0.49709800 | -1.19013000 | 1.36134400  |
| O | 0.64312100  | -0.45304000 | -1.07925300 |
| O | 0.17460400  | -1.82095700 | -1.01777400 |
| H | -0.78485800 | -1.66101500 | -1.04569900 |
| C | 3.40683500  | -0.57943100 | 0.01821400  |
| H | 3.80804200  | 0.43636700  | -0.03175600 |
| H | 4.18404200  | -1.21566000 | 0.44941300  |
| H | 3.21653900  | -0.92061600 | -1.00106800 |

# TS30

|   |             |             |             |
|---|-------------|-------------|-------------|
| C | 1.16971200  | 1.52931300  | -0.15061800 |
| C | 0.96796700  | 0.05882300  | 0.25547400  |
| C | -1.34467600 | 1.81503200  | 0.00392500  |
| C | -0.10290800 | 2.14828500  | -0.75596200 |
| H | 1.47013900  | 2.08595300  | 0.74342200  |
| H | 1.98780500  | 1.60565600  | -0.86904900 |
| H | -4.06021300 | -0.85233600 | -0.20230400 |
| H | -2.23293400 | 2.41275600  | -0.17487800 |
| H | -0.22486200 | 1.78416800  | -1.78612500 |
| H | 0.00573700  | 3.23578200  | -0.83649900 |
| O | -2.22228300 | -0.59260400 | -0.44366200 |
| O | -3.28109800 | -1.25027400 | 0.21186600  |
| C | -0.20315900 | -0.04153300 | 1.25121600  |
| H | 0.11907900  | 0.39472100  | 2.20529500  |
| C | -1.44635000 | 0.68021400  | 0.79920600  |
| H | -2.31012700 | 0.58749100  | 1.44763600  |



|     |             |             |             |
|-----|-------------|-------------|-------------|
| H   | -0.43115500 | -1.08858600 | 1.45300400  |
| C   | 2.22656200  | -0.59689200 | 0.85173900  |
| H   | 1.95495800  | -1.62281200 | 1.11637700  |
| H   | 2.47568800  | -0.08468600 | 1.78857700  |
| O   | 0.62897400  | -0.55936200 | -1.00567200 |
| O   | 0.18515200  | -1.92166500 | -0.79716800 |
| H   | -0.77906500 | -1.75834000 | -0.74865000 |
| C   | 3.44382900  | -0.62503600 | -0.07623500 |
| H   | 3.84023600  | 0.37516000  | -0.27091700 |
| H   | 4.24893700  | -1.21272800 | 0.37226100  |
| H   | 3.18395500  | -1.08019100 | -1.03353600 |
| P30 |             |             |             |
| C   | 0.79075500  | 1.40270000  | 0.34341300  |
| C   | -0.30970700 | 0.37265600  | 0.01812300  |
| C   | 0.11846400  | -0.48532100 | -1.18231700 |
| C   | 1.57014000  | -0.89162300 | -1.15145800 |
| C   | 2.47510200  | -0.34750100 | -0.33946600 |
| C   | 2.14881900  | 0.75046700  | 0.63611200  |
| H   | 0.47101600  | 2.01622000  | 1.19027200  |
| H   | 3.50104000  | -0.70567800 | -0.36193200 |
| H   | 2.93428600  | 1.51447600  | 0.61035500  |
| H   | 1.87049700  | -1.67582600 | -1.84181400 |
| H   | -0.09090900 | 0.07403500  | -2.10358200 |
| H   | 0.87827000  | 2.06671600  | -0.52249900 |
| H   | 2.15675300  | 0.34494700  | 1.65442500  |
| H   | -0.51767300 | -1.37221600 | -1.22789200 |
| C   | -1.65600800 | 1.08871900  | -0.19746000 |
| H   | -1.89003800 | 1.60972700  | 0.73659700  |
| H   | -1.49643900 | 1.86549000  | -0.95532300 |
| O   | -0.33152400 | -0.40578200 | 1.24631400  |
| O   | -1.11948700 | -1.61723600 | 1.09651300  |
| H   | -0.41682400 | -2.28038000 | 1.13661000  |
| C   | -2.85359100 | 0.22491600  | -0.61043600 |
| H   | -3.74156400 | 0.85315200  | -0.72397200 |
| H   | -2.68550200 | -0.27619800 | -1.56757100 |
| H   | -3.06866500 | -0.54040600 | 0.13463800  |
| R31 |             |             |             |
| C   | -1.44349200 | -0.13654800 | 0.41608400  |
| C   | -0.23682900 | 0.75994900  | 0.75015100  |
| C   | 0.22021500  | -2.00074600 | -0.06083800 |
| C   | -1.01638900 | -1.29940500 | -0.51388800 |
| H   | -1.75524600 | -0.57404500 | 1.37461100  |
| H   | 3.86798900  | -0.26846500 | -0.92486800 |

|      |             |             |             |
|------|-------------|-------------|-------------|
| H    | 0.37325000  | -3.04383200 | -0.31302100 |
| H    | -0.84326700 | -0.88211300 | -1.51927800 |
| H    | -1.83234900 | -2.01956900 | -0.61788700 |
| O    | 2.05470600  | -0.77466500 | -0.73379500 |
| O    | 3.18910700  | 0.08617900  | -0.33577500 |
| C    | 0.92017400  | -0.04639000 | 1.34941500  |
| H    | 0.59117900  | -0.45369400 | 2.31174100  |
| C    | 1.37257400  | -1.21886900 | 0.47294700  |
| H    | 2.06817100  | -1.85767300 | 1.02936600  |
| H    | 1.76565300  | 0.60855900  | 1.55894500  |
| H    | -0.54170300 | 1.53333600  | 1.46767100  |
| C    | -2.62765600 | 0.67325300  | -0.14031400 |
| H    | -2.79162800 | 1.53178700  | 0.52105400  |
| H    | -2.35046400 | 1.09086300  | -1.11213700 |
| O    | 0.11318700  | 1.39906400  | -0.48302100 |
| O    | 1.23897900  | 2.27982300  | -0.25679900 |
| H    | 1.98046300  | 1.70151800  | -0.51122100 |
| C    | -3.93345000 | -0.11940200 | -0.25997400 |
| H    | -4.75097600 | 0.52949000  | -0.58495600 |
| H    | -3.85738700 | -0.93203900 | -0.98727100 |
| H    | -4.22240000 | -0.55837600 | 0.70087500  |
| TS31 |             |             |             |
| C    | -1.52875100 | -0.17330300 | 0.41446400  |
| C    | -0.41506400 | 0.83690400  | 0.74683600  |
| C    | 0.37354600  | -1.80153800 | -0.06788100 |
| C    | -0.96859900 | -1.29361800 | -0.49042600 |
| H    | -1.81715000 | -0.62584600 | 1.37317100  |
| H    | 3.96119500  | -1.08581300 | -1.00698700 |
| H    | 0.70872700  | -2.74971600 | -0.47691500 |
| H    | -0.88481300 | -0.91362200 | -1.51999300 |
| H    | -1.67253600 | -2.13087500 | -0.54027600 |
| O    | 2.34206400  | -0.20967900 | -0.67147800 |
| O    | 3.69627200  | -0.42382800 | -0.35239400 |
| C    | 0.75747700  | 0.15058800  | 1.45453400  |
| H    | 0.41697900  | -0.17374700 | 2.44654000  |
| C    | 1.25953400  | -1.05038300 | 0.69557400  |
| H    | 2.13251300  | -1.54747800 | 1.10252000  |
| H    | 1.56699900  | 0.86088300  | 1.62125000  |
| C    | -2.77233400 | 0.51149300  | -0.17850200 |
| H    | -3.05261700 | 1.33814300  | 0.48434400  |
| H    | -2.50450100 | 0.96832600  | -1.13544200 |
| H    | -0.80572700 | 1.63972400  | 1.38529600  |
| O    | -0.04502100 | 1.38684900  | -0.52186600 |
| O    | 1.09125500  | 2.26698500  | -0.36372500 |

|     |             |             |             |
|-----|-------------|-------------|-------------|
| H   | 1.80487400  | 1.62807000  | -0.56282800 |
| C   | -3.97900800 | -0.41579100 | -0.35615200 |
| H   | -4.84945000 | 0.14511800  | -0.70619000 |
| H   | -3.78758500 | -1.20513200 | -1.08795400 |
| H   | -4.25428000 | -0.89677100 | 0.58848000  |
| P31 |             |             |             |
| C   | -0.54457400 | -0.55830400 | 0.60278500  |
| C   | 0.80714000  | 0.14506600  | 0.38843600  |
| C   | 0.68117300  | 1.22065200  | -0.70850000 |
| C   | -0.56768500 | 2.05196400  | -0.57073700 |
| C   | -1.60117100 | 1.70543300  | 0.19458400  |
| C   | -1.64515700 | 0.43060500  | 0.99649500  |
| H   | -0.44451400 | -1.33619800 | 1.36829000  |
| H   | -2.46763100 | 2.35857300  | 0.25678500  |
| H   | -2.61428600 | -0.06538100 | 0.88490400  |
| H   | -0.60858600 | 2.97772000  | -1.13884600 |
| H   | 0.69459100  | 0.74325000  | -1.69737000 |
| H   | 1.01173500  | 0.66267300  | 1.33591200  |
| H   | -1.55564800 | 0.65453800  | 2.06822600  |
| H   | 1.55630300  | 1.87808100  | -0.68154200 |
| C   | 1.94744500  | -0.85627300 | 0.13692400  |
| H   | 1.91131100  | -1.62087100 | 0.92181400  |
| H   | 1.76055100  | -1.38028600 | -0.80480900 |
| O   | -0.82712300 | -1.20850900 | -0.64642100 |
| O   | -1.96300200 | -2.09368500 | -0.44550500 |
| H   | -2.58505500 | -1.71801200 | -1.08276600 |
| C   | 3.34466200  | -0.22747600 | 0.11921900  |
| H   | 4.11425700  | -0.99655200 | 0.01237200  |
| H   | 3.46891900  | 0.47337400  | -0.71038000 |
| H   | 3.54805500  | 0.31664200  | 1.04758700  |

# R32

|   |             |             |             |
|---|-------------|-------------|-------------|
| C | 1.39459500  | -0.14064800 | 0.39586500  |
| C | 0.92336200  | -1.26205200 | -0.55096000 |
| C | -0.95051200 | -0.06611900 | 1.29087700  |
| C | 0.19835100  | 0.75451500  | 0.80589300  |
| H | 0.58983700  | -0.81897600 | -1.49264300 |
| H | 1.72604400  | -0.60501200 | 1.33562100  |
| H | -2.68839600 | 0.90914300  | -0.48268900 |
| H | -1.49157500 | 0.23606700  | 2.17805300  |
| H | 0.50868700  | 1.47895600  | 1.56738500  |
| O | -2.02755200 | -0.83740000 | -0.76078500 |
| O | -3.13726400 | 0.04437100  | -0.46430000 |
| C | -0.21588700 | -2.10068800 | 0.04787600  |

|      |             |             |             |
|------|-------------|-------------|-------------|
| H    | 0.14134300  | -2.64997000 | 0.92609300  |
| C    | -1.40979900 | -1.23824300 | 0.48510100  |
| H    | -2.13622600 | -1.83205200 | 1.04967800  |
| H    | -0.56856200 | -2.84165600 | -0.67530100 |
| H    | 1.76422300  | -1.92116400 | -0.78348500 |
| C    | 2.57078900  | 0.68555200  | -0.15793000 |
| H    | 2.72026700  | 1.55511700  | 0.49302100  |
| H    | 2.30119800  | 1.08470900  | -1.14012000 |
| O    | -0.12417400 | 1.49362100  | -0.39958200 |
| O    | -1.31316800 | 2.29762000  | -0.10451800 |
| H    | -1.13321400 | 3.05337500  | -0.67975500 |
| C    | 3.88701800  | -0.09296100 | -0.25449200 |
| H    | 3.82004800  | -0.92713500 | -0.95732300 |
| H    | 4.69663000  | 0.55667400  | -0.59743700 |
| H    | 4.17945400  | -0.49989200 | 0.71900100  |
| TS32 |             |             |             |
| C    | 1.49976000  | -0.18563200 | 0.39309600  |
| C    | 0.89415800  | -1.19786300 | -0.59884200 |
| C    | -0.82231700 | 0.16047900  | 1.30099100  |
| C    | 0.41528300  | 0.83856700  | 0.78556900  |
| H    | 0.61109800  | -0.66427300 | -1.50933100 |
| H    | 1.76090200  | -0.71534800 | 1.32075800  |
| H    | -4.03181900 | 0.37491700  | -0.13285300 |
| H    | -1.44197400 | 0.68775500  | 2.01637300  |
| H    | 0.79634100  | 1.54623700  | 1.53136600  |
| O    | -2.35235000 | -0.27374200 | -0.67746800 |
| O    | -3.69971300 | -0.50537300 | -0.36239400 |
| C    | -0.33389000 | -1.92019400 | -0.02428600 |
| H    | -0.00920500 | -2.68667000 | 0.69390400  |
| C    | -1.28217800 | -1.01805100 | 0.72242600  |
| H    | -2.13537400 | -1.50708300 | 1.17984100  |
| H    | -0.88129900 | -2.44696000 | -0.80945200 |
| C    | 2.77313100  | 0.50444400  | -0.13018200 |
| H    | 2.55192700  | 0.99074200  | -1.08438000 |
| H    | 3.03727900  | 1.30973300  | 0.56522300  |
| H    | 1.64153300  | -1.94321600 | -0.88160300 |
| O    | 0.14930500  | 1.56357000  | -0.44092100 |
| O    | -1.07059500 | 2.33008900  | -0.30652600 |
| H    | -1.70543300 | 1.66056700  | -0.62345100 |
| C    | 3.97543200  | -0.43295100 | -0.28273400 |
| H    | 3.80099400  | -1.20778800 | -1.03365100 |
| H    | 4.86304000  | 0.12457800  | -0.59301200 |
| H    | 4.21255000  | -0.93233700 | 0.66251700  |
| P32  |             |             |             |

|   |             |             |             |
|---|-------------|-------------|-------------|
| C | 0.66344300  | 1.19269200  | 0.75516600  |
| C | 0.76877600  | 0.11233800  | -0.33474400 |
| C | -0.61434200 | -0.52384400 | -0.56540500 |
| C | -1.71224000 | 0.50573100  | -0.68204600 |
| C | -1.56730500 | 1.76891400  | -0.28064000 |
| C | -0.30735600 | 2.30706800  | 0.34110500  |
| H | 1.64574500  | 1.62102500  | 0.96950100  |
| H | -2.38910000 | 2.46875000  | -0.41417300 |
| H | -0.56253800 | 2.93181200  | 1.20474500  |
| H | -2.64768600 | 0.17580600  | -1.12215400 |
| H | 1.01399300  | 0.61191600  | -1.28302900 |
| H | 0.30925200  | 0.72289400  | 1.67855100  |
| H | 0.17838300  | 2.98533500  | -0.37544700 |
| H | -0.58742700 | -1.14440000 | -1.46915600 |
| C | 1.85727000  | -0.94263600 | -0.06609700 |
| H | 1.72006400  | -1.76978200 | -0.77170600 |
| H | 1.70779200  | -1.37239800 | 0.92831800  |
| O | -0.83396900 | -1.41378800 | 0.55228300  |
| O | -2.03585500 | -2.17959300 | 0.28150600  |
| H | -2.66152900 | -1.74722900 | 0.87915100  |
| C | 3.28667700  | -0.40676200 | -0.19888800 |
| H | 3.50164200  | 0.37977800  | 0.52949900  |
| H | 4.01634900  | -1.20487300 | -0.03829900 |
| H | 3.46411400  | 0.00741800  | -1.19682600 |

### R33

|   |             |             |             |
|---|-------------|-------------|-------------|
| C | -2.04137500 | 0.25472900  | 0.85701500  |
| C | -0.61291100 | -0.10803800 | 1.11088400  |
| C | 0.45870400  | 0.20491100  | 0.10933500  |
| C | 0.25987900  | 1.62853600  | -0.46174700 |
| C | -1.19464300 | 1.92757100  | -0.85086700 |
| C | -2.16597300 | 1.68354500  | 0.31048700  |
| H | -2.63046900 | 0.13117200  | 1.77190900  |
| H | 0.59735100  | 2.33219700  | 0.30784200  |
| H | 0.91629500  | 1.76015700  | -1.32580100 |
| H | -1.26997800 | 2.96736000  | -1.18408800 |
| H | -1.47972400 | 1.29659400  | -1.69487700 |
| H | -1.96090600 | 2.37944000  | 1.13186900  |
| H | -3.19990400 | 1.84843800  | -0.00506600 |
| C | 1.85543500  | -0.02864700 | 0.71009400  |
| H | 1.89566500  | -1.07249200 | 1.03859500  |
| H | 1.93765600  | 0.58396000  | 1.61587300  |
| O | 0.29131900  | -0.61225000 | -1.09773000 |
| O | 0.20998000  | -2.01943100 | -0.68972800 |

|      |             |             |             |
|------|-------------|-------------|-------------|
| H    | -0.35846300 | -0.70777100 | 1.97644100  |
| H    | 0.63305200  | -2.42601000 | -1.45751900 |
| O    | -2.64178700 | -0.56570900 | -0.17443900 |
| O    | -2.53847600 | -1.95511800 | 0.21903200  |
| H    | -1.68658000 | -2.18992400 | -0.19176800 |
| C    | 3.04167700  | 0.25364800  | -0.21815800 |
| H    | 3.07060700  | 1.31625700  | -0.48029600 |
| H    | 2.89891500  | -0.29051300 | -1.15691000 |
| C    | 4.38048200  | -0.14401100 | 0.41131600  |
| H    | 5.21444100  | 0.06511800  | -0.26393400 |
| H    | 4.56134400  | 0.40456400  | 1.34103000  |
| H    | 4.40475900  | -1.21195200 | 0.64945400  |
| TS33 |             |             |             |
| C    | 1.79676400  | 0.42434200  | -0.95938200 |
| C    | 0.36424300  | 0.11239700  | -1.25145300 |
| C    | -0.65870100 | 0.28201900  | -0.31079600 |
| C    | -0.40960900 | 1.17026600  | 0.89367100  |
| C    | 1.06927000  | 1.36567300  | 1.26535000  |
| C    | 1.95891600  | 1.56943200  | 0.03743700  |
| H    | 2.33727800  | 0.64168700  | -1.88796300 |
| H    | -0.86485400 | 2.14336200  | 0.65987800  |
| H    | -0.95725600 | 0.77263100  | 1.75001400  |
| H    | 1.16108600  | 2.22238500  | 1.93951200  |
| H    | 1.41535700  | 0.49168800  | 1.81675800  |
| H    | 1.69419700  | 2.49868500  | -0.48192100 |
| H    | 3.01012800  | 1.64811400  | 0.32255000  |
| C    | -2.08936400 | 0.18685500  | -0.81865300 |
| H    | -2.14395300 | -0.66622600 | -1.50382100 |
| H    | -2.27917100 | 1.08070200  | -1.42893900 |
| O    | -0.58653700 | -1.50519700 | 0.35891000  |
| O    | 0.29178700  | -1.64762500 | 1.43225300  |
| H    | 0.14169800  | -0.41047300 | -2.17524500 |
| H    | 1.13826300  | -1.82749700 | 0.98593700  |
| O    | 2.34192200  | -0.83177800 | -0.44433900 |
| O    | 3.77969400  | -0.67940100 | -0.26172200 |
| H    | 4.10402800  | -1.20062900 | -1.00943700 |
| C    | -3.19124400 | 0.05788800  | 0.24028100  |
| H    | -3.20256100 | 0.94770200  | 0.87828500  |
| H    | -2.96066700 | -0.79231500 | 0.88583500  |
| C    | -4.57491000 | -0.12297600 | -0.39117200 |
| H    | -4.61459000 | -1.02902300 | -1.00371400 |
| H    | -5.35020600 | -0.20755700 | 0.37480800  |
| H    | -4.83590100 | 0.72340000  | -1.03504600 |
| P33  |             |             |             |

|   |             |             |             |
|---|-------------|-------------|-------------|
| C | -1.50794700 | -0.51651300 | 0.57052100  |
| C | -0.02028000 | -0.55033700 | 0.34980700  |
| C | 0.71005200  | 0.52193200  | 0.02335200  |
| C | 0.07378100  | 1.88205000  | -0.17612100 |
| C | -1.44404000 | 1.81423800  | -0.37131100 |
| C | -2.07415100 | 0.89880500  | 0.67934200  |
| H | -1.76569300 | -1.09837500 | 1.46277400  |
| H | 0.31317500  | 2.51114600  | 0.69373700  |
| H | 0.54582700  | 2.37631400  | -1.03317300 |
| H | -1.87761800 | 2.81751200  | -0.32637000 |
| H | -1.66168100 | 1.41280000  | -1.36675600 |
| H | -1.86516900 | 1.28271600  | 1.68527600  |
| H | -3.16120500 | 0.84964500  | 0.57941500  |
| C | 2.21079400  | 0.48915100  | -0.15773000 |
| H | 2.43260900  | 0.81095000  | -1.18540500 |
| H | 2.64462900  | 1.27374300  | 0.47959700  |
| H | 0.44428200  | -1.52290100 | 0.46328000  |
| O | -2.05126900 | -1.23028800 | -0.56329000 |
| O | -3.42971300 | -1.58601400 | -0.23015500 |
| H | -3.89269200 | -1.16823100 | -0.96786700 |
| C | 2.92981000  | -0.83366200 | 0.11760600  |
| H | 2.72215400  | -1.15611900 | 1.14362700  |
| H | 2.52760500  | -1.61268900 | -0.53858600 |
| C | 4.44403400  | -0.72918100 | -0.08823400 |
| H | 4.88513700  | 0.01879200  | 0.57813000  |
| H | 4.93783900  | -1.68359500 | 0.11221300  |
| H | 4.68634700  | -0.44018900 | -1.11571900 |

#### R34

|   |             |             |             |
|---|-------------|-------------|-------------|
| C | 2.20346300  | -1.81525200 | -0.45805000 |
| C | 0.75042900  | -1.38932900 | -0.70355900 |
| C | 2.50739100  | 0.23376700  | 0.96496700  |
| C | 3.09951200  | -0.61673500 | -0.10577000 |
| H | 0.69989300  | -0.75864000 | -1.59419200 |
| H | 0.14695200  | -2.27711700 | -0.90999900 |
| H | 2.23169700  | -2.53991200 | 0.36492100  |
| H | 2.59604200  | -2.32739400 | -1.34143300 |
| H | 0.20238800  | 1.40767800  | -1.40661200 |
| H | 3.15206400  | 0.87390500  | 1.55790700  |
| H | 3.23312500  | 0.00212800  | -1.00945000 |
| H | 4.10038200  | -0.95404900 | 0.18286900  |
| C | -1.32435900 | -0.25440300 | 0.37186700  |
| H | -1.64947200 | 0.23716700  | 1.29304500  |
| O | 0.76780500  | 1.81233900  | 0.33921700  |

|      |             |             |             |
|------|-------------|-------------|-------------|
| O    | 1.06674800  | 1.72316100  | -1.07854200 |
| C    | 0.16274800  | -0.64640500 | 0.51533600  |
| H    | 0.18764400  | -1.35898700 | 1.35252500  |
| C    | 1.04970700  | 0.52788800  | 1.00186700  |
| H    | 0.74423000  | 0.80060700  | 2.01969800  |
| O    | -1.50531600 | 0.72722600  | -0.68736400 |
| O    | -1.92995000 | 1.99033800  | -0.11853800 |
| H    | -1.06788800 | 2.33504200  | 0.18975800  |
| C    | -2.26385000 | -1.42625900 | 0.07334400  |
| H    | -2.02423800 | -2.24911600 | 0.75691300  |
| H    | -2.06411200 | -1.79036900 | -0.93873900 |
| C    | -3.74043500 | -1.04444100 | 0.19894500  |
| H    | -3.97675300 | -0.20627100 | -0.45922400 |
| H    | -4.38527300 | -1.88407500 | -0.07238200 |
| H    | -3.98859700 | -0.74809900 | 1.22253000  |
| TS34 |             |             |             |
| C    | 1.77791100  | -2.23368800 | -0.55530100 |
| C    | 0.45078000  | -1.50810900 | -0.81214400 |
| C    | 2.42282000  | -0.22313700 | 0.84000100  |
| C    | 2.89030700  | -1.26156400 | -0.13118400 |
| H    | 0.55237600  | -0.79989900 | -1.63884600 |
| H    | -0.31315500 | -2.23090600 | -1.10901400 |
| H    | 1.63156700  | -2.97938200 | 0.23517900  |
| H    | 2.08938900  | -2.78340600 | -1.44804200 |
| H    | 2.52184600  | 2.88087000  | 0.00007900  |
| H    | 3.17414200  | 0.35183200  | 1.37331900  |
| H    | 3.28334100  | -0.74152600 | -1.01922900 |
| H    | 3.74508000  | -1.80588000 | 0.28601300  |
| C    | -1.41529600 | -0.10244500 | 0.31552900  |
| H    | -1.55112700 | 0.63808200  | 1.11013600  |
| O    | 1.18306600  | 1.62662100  | -0.37132800 |
| O    | 1.61451700  | 2.77672500  | 0.31916500  |
| C    | -0.00773500 | -0.74378400 | 0.44247000  |
| H    | -0.11384000 | -1.47935900 | 1.25628500  |
| C    | 1.09454000  | 0.17103400  | 0.94087100  |
| H    | 0.82960500  | 0.85919600  | 1.73681400  |
| O    | -1.59244000 | 0.57965100  | -0.93319200 |
| O    | -1.46764000 | 2.00558200  | -0.74139800 |
| H    | -0.49088400 | 2.08991400  | -0.72585400 |
| C    | -2.54151700 | -1.14321300 | 0.40370600  |
| H    | -2.37088600 | -1.76847200 | 1.28745000  |
| H    | -2.48199400 | -1.80559500 | -0.46617200 |
| C    | -3.93092500 | -0.50617600 | 0.46917600  |
| H    | -4.09351000 | 0.14097300  | -0.39400800 |



|     |             |             |             |
|-----|-------------|-------------|-------------|
| H   | -4.71226600 | -1.27065000 | 0.47947500  |
| H   | -4.04502400 | 0.10206900  | 1.37169900  |
| P34 |             |             |             |
| C   | 2.56138800  | -1.21428000 | -0.42233700 |
| C   | 1.03973700  | -1.10431000 | -0.57808700 |
| C   | 0.40954100  | -0.36274200 | 0.61779100  |
| C   | 1.21788900  | 0.86326800  | 0.98344400  |
| C   | 2.45363600  | 1.10573200  | 0.54864200  |
| C   | 3.21567500  | 0.17215500  | -0.35572900 |
| H   | 0.60043700  | -2.10045700 | -0.67857800 |
| H   | 2.98520400  | -1.79333000 | -1.24834200 |
| H   | 2.95504000  | 2.02085700  | 0.85383300  |
| H   | 4.25235200  | 0.08721900  | -0.01001000 |
| C   | -1.07601000 | 0.00609500  | 0.40198100  |
| H   | 0.73945100  | 1.57673900  | 1.65142900  |
| H   | -1.40234900 | 0.62515000  | 1.24562600  |
| H   | 0.41329300  | -1.03912400 | 1.48619100  |
| H   | 0.80662200  | -0.55670700 | -1.49679100 |
| H   | 2.79122600  | -1.76432400 | 0.49829000  |
| H   | 3.27564000  | 0.61086000  | -1.36167300 |
| O   | -1.11109300 | 0.84073400  | -0.77287500 |
| O   | -2.19672500 | 1.79868800  | -0.63919500 |
| H   | -1.68658300 | 2.62005700  | -0.62211100 |
| C   | -2.00691600 | -1.20153800 | 0.25992500  |
| H   | -1.82151700 | -1.87126800 | 1.10879500  |
| H   | -1.72678600 | -1.75304300 | -0.64265800 |
| C   | -3.49612400 | -0.84789000 | 0.20189200  |
| H   | -3.71547200 | -0.20407200 | -0.65071900 |
| H   | -4.10236800 | -1.75351000 | 0.11267700  |
| H   | -3.81454700 | -0.31935800 | 1.10547400  |

# R35

|   |             |             |             |
|---|-------------|-------------|-------------|
| C | 0.35457400  | -1.81756100 | -0.08552900 |
| C | 1.87627300  | -1.70828200 | 0.07768500  |
| C | 0.36668600  | 0.48960100  | -1.02613500 |
| C | -0.36468500 | -0.45154700 | -0.11820500 |
| H | 2.11485300  | -1.30366400 | 1.06453800  |
| H | 2.32007500  | -2.70715700 | 0.02596700  |
| H | 0.12012800  | -2.33480200 | -1.02292100 |
| H | -0.08324200 | -2.41588300 | 0.71825100  |
| H | 0.88587700  | 2.02247700  | 1.08052600  |
| H | -0.19419800 | 1.14341700  | -1.68080000 |
| O | 2.34092600  | 1.16844500  | 0.26011100  |
| O | 1.60831100  | 2.38460200  | 0.53980400  |

|      |             |             |             |
|------|-------------|-------------|-------------|
| C    | 2.50616500  | -0.80245800 | -0.98915400 |
| H    | 2.37380300  | -1.23469100 | -1.98711700 |
| C    | 1.85826100  | 0.59096900  | -0.97740500 |
| H    | 2.22033500  | 1.20508300  | -1.80870700 |
| H    | 3.58135500  | -0.69114000 | -0.82256400 |
| C    | -1.84986600 | -0.61337800 | -0.48201500 |
| H    | -1.89865700 | -0.97251100 | -1.51712600 |
| O    | -0.23908100 | 0.21882800  | 1.18815000  |
| O    | -0.91317300 | -0.56081000 | 2.21962200  |
| H    | -0.15147500 | -0.86760900 | 2.73040000  |
| C    | -2.71069000 | 0.64497000  | -0.32283900 |
| H    | -2.30134500 | 1.46365100  | -0.92479400 |
| H    | -2.66386200 | 0.97647200  | 0.71723900  |
| H    | -2.26560800 | -1.40876800 | 0.14426500  |
| C    | -4.16887600 | 0.40353300  | -0.72530200 |
| H    | -4.62095900 | -0.38600200 | -0.11708300 |
| H    | -4.76994300 | 1.30713600  | -0.59406000 |
| H    | -4.25005900 | 0.10039400  | -1.77411700 |
| TS35 |             |             |             |
| C    | -0.52018300 | 1.67914300  | -0.28650200 |
| C    | 0.88531700  | 2.06269000  | -0.77119800 |
| C    | 0.53186800  | -0.16286900 | 1.03867600  |
| C    | -0.59756700 | 0.19075500  | 0.10266300  |
| H    | 1.10555000  | 1.50070600  | -1.68093700 |
| H    | 0.91098700  | 3.12410600  | -1.03433800 |
| H    | -0.80869400 | 2.27712500  | 0.58581900  |
| H    | -1.25214600 | 1.87972400  | -1.07215200 |
| H    | 3.16514400  | -2.40842600 | 0.39286200  |
| H    | 0.38973700  | -1.00876300 | 1.70223100  |
| O    | 2.59358200  | -0.76445800 | -0.32114600 |
| O    | 3.56082200  | -1.52538200 | 0.35344900  |
| C    | 1.96042900  | 1.76761200  | 0.28152700  |
| H    | 1.91460500  | 2.51811300  | 1.08381200  |
| C    | 1.78919400  | 0.42482900  | 0.94274000  |
| H    | 2.51706900  | 0.17926600  | 1.70851700  |
| C    | -1.94190000 | -0.24633500 | 0.70468000  |
| H    | -1.87543300 | -1.32747700 | 0.87114900  |
| H    | -2.04690200 | 0.21717200  | 1.69421800  |
| H    | 2.96275900  | 1.83361900  | -0.14757400 |
| O    | -0.39891000 | -0.46604100 | -1.19008000 |
| O    | -0.02143400 | -1.85100200 | -0.99976600 |
| H    | 0.94727700  | -1.73995600 | -0.95648500 |
| C    | -3.17830800 | 0.05350900  | -0.14927600 |
| H    | -3.31897300 | 1.13583900  | -0.24094000 |

|     |             |             |             |
|-----|-------------|-------------|-------------|
| H   | -3.00646600 | -0.32754300 | -1.15977200 |
| C   | -4.45135900 | -0.56969900 | 0.43145600  |
| H   | -4.65627600 | -0.19458200 | 1.43948200  |
| H   | -5.32219100 | -0.34309600 | -0.18951600 |
| H   | -4.36347900 | -1.65857100 | 0.49536400  |
| P35 |             |             |             |
| C   | -2.11105800 | -0.96143200 | -0.99746200 |
| C   | -0.62339200 | -1.12573000 | -0.66885100 |
| C   | -0.04440100 | 0.10764900  | 0.04548300  |
| C   | -1.00743000 | 0.63772400  | 1.08953500  |
| C   | -2.27853600 | 0.24988600  | 1.19920100  |
| C   | -2.93746900 | -0.73602200 | 0.27327800  |
| H   | -0.04889900 | -1.30586100 | -1.58022000 |
| H   | -2.47599200 | -1.83976100 | -1.53774500 |
| H   | -2.88570500 | 0.64998600  | 2.00808400  |
| H   | -3.94480400 | -0.38705600 | 0.01978300  |
| C   | 1.33125800  | -0.15231700 | 0.68664300  |
| H   | -0.59891600 | 1.35263400  | 1.79724300  |
| H   | 1.66865600  | 0.79301800  | 1.12356100  |
| H   | 1.18967000  | -0.84979200 | 1.52138600  |
| H   | -0.47555300 | -1.99379700 | -0.01631400 |
| H   | -2.22916700 | -0.10245100 | -1.66428000 |
| H   | -3.08288900 | -1.68511000 | 0.80958000  |
| O   | 0.09717000  | 1.06030500  | -1.05354400 |
| O   | 0.52893500  | 2.34362800  | -0.53316600 |
| H   | -0.31548300 | 2.81416000  | -0.49512900 |
| C   | 2.41429400  | -0.67853500 | -0.26185600 |
| H   | 2.13367700  | -1.66585900 | -0.64408700 |
| H   | 2.47632100  | -0.01436800 | -1.12841800 |
| C   | 3.78402900  | -0.77476800 | 0.41726000  |
| H   | 4.54333100  | -1.15276000 | -0.27281400 |
| H   | 4.11741600  | 0.20481400  | 0.77338200  |
| H   | 3.75573500  | -1.44798000 | 1.28029000  |
| R36 |             |             |             |
| C   | 0.46573900  | 1.77854300  | -0.03062000 |
| C   | 0.51512100  | 0.25502800  | 0.17750800  |
| C   | -2.06693800 | 1.62628000  | 0.11350000  |
| C   | -0.89813400 | 2.24860500  | -0.57015900 |
| H   | 0.67800000  | 2.25454700  | 0.93257200  |
| H   | 1.25189700  | 2.08521900  | -0.72282300 |
| H   | -3.82616600 | -1.91475400 | 0.20444400  |
| H   | -3.04678100 | 2.07744300  | -0.00256700 |
| H   | -0.94804000 | 2.00368500  | -1.64261800 |

|      |             |             |             |
|------|-------------|-------------|-------------|
| H    | -0.96834600 | 3.34090800  | -0.51392700 |
| O    | -2.53227200 | -0.64084300 | -0.32754700 |
| O    | -2.86615100 | -1.91523000 | 0.32004600  |
| C    | -0.60669700 | -0.16116500 | 1.14837900  |
| H    | -0.39773400 | 0.29824700  | 2.12023300  |
| C    | -2.00671600 | 0.26449900  | 0.70724400  |
| H    | -2.70548800 | 0.17847700  | 1.54673300  |
| C    | 1.87138800  | -0.25930000 | 0.69143900  |
| H    | 2.03246100  | 0.12896700  | 1.70502200  |
| H    | 1.78289000  | -1.34674100 | 0.78378400  |
| H    | -0.59548100 | -1.24128400 | 1.30062800  |
| O    | 0.26631600  | -0.23904800 | -1.15984900 |
| O    | 0.03669600  | -1.66763200 | -1.13469700 |
| H    | -0.93597100 | -1.67137800 | -1.10703100 |
| C    | 3.08238800  | 0.06515800  | -0.19058100 |
| H    | 3.25890500  | 1.14613500  | -0.20925500 |
| H    | 2.85721500  | -0.23312800 | -1.21818100 |
| C    | 4.35568700  | -0.63988500 | 0.28751400  |
| H    | 5.20852300  | -0.39522100 | -0.35160500 |
| H    | 4.61417500  | -0.34859600 | 1.31095800  |
| H    | 4.23221000  | -1.72708700 | 0.27467100  |
| TS36 |             |             |             |
| C    | 0.53396700  | 1.75780300  | -0.16670400 |
| C    | 0.57476300  | 0.26087800  | 0.18868100  |
| C    | -1.98501300 | 1.65445800  | 0.10529100  |
| C    | -0.84465500 | 2.19690200  | -0.69193800 |
| H    | 0.79080500  | 2.32364500  | 0.73510300  |
| H    | 1.29557200  | 1.98096100  | -0.91587200 |
| H    | -4.27827100 | -1.38147400 | -0.09945600 |
| H    | -2.96021300 | 2.11650900  | -0.01197700 |
| H    | -0.95992400 | 1.85329300  | -1.72989300 |
| H    | -0.90378100 | 3.29041200  | -0.73307400 |
| O    | -2.51167600 | -0.84214300 | -0.40234200 |
| O    | -3.43118100 | -1.67167800 | 0.26815100  |
| C    | -0.52020200 | -0.04816200 | 1.22787800  |
| H    | -0.22206800 | 0.40007800  | 2.18419000  |
| C    | -1.87758200 | 0.49135300  | 0.85761500  |
| H    | -2.68600500 | 0.24679600  | 1.53718800  |
| H    | -0.57881100 | -1.12374700 | 1.39730300  |
| C    | 1.94260000  | -0.21788200 | 0.70640900  |
| H    | 1.84122700  | -1.28389400 | 0.93473900  |
| H    | 2.15505800  | 0.28837900  | 1.65650700  |
| O    | 0.27140100  | -0.35942000 | -1.08094100 |
| O    | 0.04717100  | -1.77929000 | -0.90862400 |

|   |             |             |             |
|---|-------------|-------------|-------------|
| H | -0.92712000 | -1.76556400 | -0.81181600 |
| C | 3.11820400  | -0.03020900 | -0.25922000 |
| H | 3.30487100  | 1.03630900  | -0.42613100 |
| H | 2.84608600  | -0.45573700 | -1.22878100 |
| C | 4.40304900  | -0.68697200 | 0.25493800  |
| H | 4.26770500  | -1.76441000 | 0.38967800  |
| H | 5.23024000  | -0.54164000 | -0.44520500 |
| H | 4.70812500  | -0.26869000 | 1.21984000  |

P36

|   |             |             |             |
|---|-------------|-------------|-------------|
| C | 1.03697600  | -1.35887900 | -0.57788600 |
| C | 0.06099100  | -0.25042400 | -0.13304400 |
| C | 0.49772800  | 0.31035300  | 1.22934500  |
| C | 1.98817700  | 0.49778200  | 1.35953700  |
| C | 2.87734900  | -0.02297900 | 0.51543900  |
| C | 2.49026100  | -0.87323400 | -0.66396000 |
| H | 0.71076900  | -1.76081600 | -1.54111900 |
| H | 3.93647700  | 0.17081400  | 0.66400700  |
| H | 3.16071600  | -1.73752600 | -0.73350200 |
| H | 2.33153000  | 1.09627900  | 2.19958600  |
| H | 0.13852000  | -0.36562900 | 2.01632300  |
| H | 0.96057200  | -2.16958400 | 0.15368000  |
| H | 2.63917700  | -0.30176600 | -1.58738600 |
| H | -0.01542900 | 1.25905800  | 1.40233400  |
| C | -1.38211600 | -0.78728700 | -0.13592000 |
| H | -1.60339800 | -1.09801700 | -1.16329100 |
| H | -1.39595800 | -1.70060700 | 0.47352700  |
| O | 0.25050100  | 0.72594500  | -1.19394500 |
| O | -0.37417900 | 1.99633300  | -0.86818400 |
| H | 0.41322700  | 2.54217100  | -0.73684500 |
| C | -2.49632900 | 0.14824600  | 0.35419700  |
| H | -2.29912900 | 0.45682600  | 1.38656300  |
| H | -2.49727200 | 1.06029400  | -0.24504800 |
| C | -3.87310000 | -0.52112000 | 0.28653700  |
| H | -4.65928200 | 0.15287200  | 0.63750700  |
| H | -4.12071300 | -0.81274500 | -0.73898000 |
| H | -3.91001200 | -1.42458700 | 0.90420800  |

R37

|   |             |             |             |
|---|-------------|-------------|-------------|
| C | -0.99025500 | -0.29797000 | 0.51862100  |
| C | 0.16259500  | 0.67769900  | 0.82025700  |
| C | 0.78111400  | -2.01568500 | -0.10118800 |
| C | -0.52638200 | -1.39778800 | -0.46882000 |
| H | -1.21706800 | -0.78482000 | 1.47708300  |
| H | 4.24067900  | 0.01131600  | -1.08840800 |

|      |             |             |             |
|------|-------------|-------------|-------------|
| H    | 0.99784400  | -3.03654400 | -0.39431400 |
| H    | -0.43773200 | -0.93971000 | -1.46737100 |
| H    | -1.29046600 | -2.17483700 | -0.55551200 |
| O    | 2.48214000  | -0.63567900 | -0.82446700 |
| O    | 3.56855200  | 0.29715700  | -0.45577500 |
| C    | 1.40626100  | -0.05476100 | 1.33471900  |
| H    | 1.15939500  | -0.51269400 | 2.29886000  |
| C    | 1.89847400  | -1.16436300 | 0.39970300  |
| H    | 2.66751000  | -1.76413700 | 0.90008700  |
| H    | 2.21034900  | 0.65654200  | 1.52242300  |
| H    | -0.16098500 | 1.40525300  | 1.57644700  |
| C    | -2.25823600 | 0.43621100  | 0.04958200  |
| H    | -2.44583900 | 1.26749000  | 0.74076400  |
| H    | -2.06902900 | 0.89440600  | -0.92619400 |
| O    | 0.39893900  | 1.37577000  | -0.40795800 |
| O    | 1.46639600  | 2.33282500  | -0.21070300 |
| H    | 2.23451100  | 1.81994500  | -0.52035700 |
| C    | -3.51726400 | -0.43726400 | -0.01914200 |
| H    | -3.37936200 | -1.23969600 | -0.75183000 |
| H    | -3.67071800 | -0.93011400 | 0.94938000  |
| C    | -4.77075400 | 0.36258300  | -0.38725200 |
| H    | -5.65481600 | -0.27913900 | -0.43452400 |
| H    | -4.96839800 | 1.14843800  | 0.34834200  |
| H    | -4.65740300 | 0.84574100  | -1.36253100 |
| TS37 |             |             |             |
| C    | -1.07208600 | -0.25828200 | 0.54309300  |
| C    | 0.02527000  | 0.78233200  | 0.83452900  |
| C    | 0.85311200  | -1.80810100 | -0.08759400 |
| C    | -0.52833600 | -1.33917000 | -0.41846300 |
| H    | -1.28831200 | -0.74065900 | 1.50610700  |
| H    | 4.35015400  | -0.94766600 | -1.22056100 |
| H    | 1.19542600  | -2.73463400 | -0.53823200 |
| H    | -0.51936200 | -0.93546500 | -1.44233200 |
| H    | -1.20485600 | -2.19971500 | -0.44581900 |
| O    | 2.72694300  | -0.13459200 | -0.76682700 |
| O    | 4.10419500  | -0.31046600 | -0.53472300 |
| C    | 1.25986600  | 0.12196600  | 1.45636700  |
| H    | 0.98924800  | -0.23628500 | 2.45819000  |
| C    | 1.75682600  | -1.04316900 | 0.64051900  |
| H    | 2.66884900  | -1.51790900 | 0.98351300  |
| H    | 2.05325500  | 0.85643300  | 1.59330900  |
| C    | -2.36942600 | 0.39707100  | 0.03943300  |
| H    | -2.63486600 | 1.20471500  | 0.73305200  |
| H    | -2.17646300 | 0.87839200  | -0.92463000 |

|     |             |             |             |
|-----|-------------|-------------|-------------|
| H   | -0.35384700 | 1.55682200  | 1.51359700  |
| O   | 0.30166900  | 1.37251000  | -0.43991600 |
| O   | 1.41439200  | 2.28886500  | -0.32639400 |
| H   | 2.13650000  | 1.68028200  | -0.58181500 |
| C   | -3.56457700 | -0.55650000 | -0.08321100 |
| H   | -3.34787800 | -1.33802000 | -0.81952600 |
| H   | -3.71817500 | -1.07149800 | 0.87375100  |
| C   | -4.85490800 | 0.16361400  | -0.48664400 |
| H   | -5.69197600 | -0.53442100 | -0.57195200 |
| H   | -5.12954600 | 0.92476200  | 0.24995400  |
| H   | -4.74018200 | 0.66576600  | -1.45191100 |
| P37 |             |             |             |
| C   | 0.88046000  | 0.59400500  | 0.60383500  |
| C   | -0.32092900 | -0.34416400 | 0.39230800  |
| C   | -0.00346800 | -1.37819400 | -0.70638800 |
| C   | 1.37713600  | -1.96641600 | -0.57452200 |
| C   | 2.33237600  | -1.43750300 | 0.18806000  |
| C   | 2.14475300  | -0.17731900 | 0.99225600  |
| H   | 0.64235300  | 1.33930100  | 1.37124300  |
| H   | 3.30410600  | -1.92081900 | 0.24602200  |
| H   | 3.00629100  | 0.48788100  | 0.87860900  |
| H   | 1.58489100  | -2.86820000 | -1.14469100 |
| H   | -0.10832500 | -0.91111400 | -1.69470900 |
| H   | -0.42404900 | -0.89081600 | 1.33982900  |
| H   | 2.10137400  | -0.41526500 | 2.06383400  |
| H   | -0.74289400 | -2.18509900 | -0.67679000 |
| C   | -1.62472100 | 0.43341300  | 0.14556100  |
| H   | -1.72370600 | 1.19685200  | 0.92782300  |
| H   | -1.54374700 | 0.97913100  | -0.80006900 |
| O   | 1.03511500  | 1.28665800  | -0.64490300 |
| O   | 1.99004600  | 2.36482500  | -0.44542500 |
| H   | 2.66809700  | 2.11102100  | -1.08574500 |
| C   | -2.89310500 | -0.42894500 | 0.14007900  |
| H   | -2.84601500 | -1.15944600 | -0.67450800 |
| H   | -2.94126800 | -1.01014300 | 1.06975100  |
| C   | -4.17163700 | 0.40158000  | -0.00766100 |
| H   | -5.06209900 | -0.23299000 | -0.01398300 |
| H   | -4.27729000 | 1.11530400  | 0.81535000  |
| H   | -4.16419500 | 0.97379200  | -0.94051000 |
| R38 |             |             |             |
| C   | 0.94228100  | -0.30730900 | 0.50098600  |
| C   | 0.43112000  | -1.36183400 | -0.50089200 |
| C   | -1.43446600 | -0.05467200 | 1.27229000  |

|      |             |             |             |
|------|-------------|-------------|-------------|
| C    | -0.19617400 | 0.67636600  | 0.87175100  |
| H    | 0.18866000  | -0.86965900 | -1.44601100 |
| H    | 1.18037600  | -0.82008200 | 1.44371700  |
| H    | -2.98487800 | 1.10723000  | -0.56199500 |
| H    | -1.99485600 | 0.26993400  | 2.13932400  |
| H    | 0.13131100  | 1.35397100  | 1.66833300  |
| O    | -2.45838400 | -0.68221900 | -0.85437300 |
| O    | -3.50491600 | 0.28364800  | -0.59200600 |
| C    | -0.80599500 | -2.11403200 | 0.01250300  |
| H    | -0.54524900 | -2.71288000 | 0.89227800  |
| C    | -1.94572800 | -1.16364300 | 0.41047200  |
| H    | -2.74923100 | -1.70669500 | 0.91894600  |
| H    | -1.17917900 | -2.80452600 | -0.74932400 |
| H    | 1.22500800  | -2.08477500 | -0.70722700 |
| C    | 2.21136700  | 0.42988100  | 0.03433800  |
| H    | 2.38971500  | 1.27801100  | 0.70781800  |
| H    | 2.03721600  | 0.86204700  | -0.95651700 |
| O    | -0.38864500 | 1.46755600  | -0.32826300 |
| O    | -1.52007400 | 2.36354400  | -0.07438900 |
| H    | -1.24521700 | 3.11447800  | -0.61753100 |
| C    | 3.47396000  | -0.44119800 | 0.00306000  |
| H    | 3.33815400  | -1.27328000 | -0.69553500 |
| H    | 3.62588400  | -0.89256900 | 0.99145300  |
| C    | 4.72571700  | 0.34676100  | -0.39468600 |
| H    | 4.91825800  | 1.16477100  | 0.30654000  |
| H    | 5.61181300  | -0.29347100 | -0.40969700 |
| H    | 4.61586700  | 0.78534000  | -1.39125600 |
| TS38 |             |             |             |
| C    | 1.04818600  | -0.26110900 | 0.49841500  |
| C    | 0.45810700  | -1.23805700 | -0.53779800 |
| C    | -1.30324500 | 0.14794400  | 1.29943000  |
| C    | -0.02087900 | 0.79227800  | 0.85488700  |
| H    | 0.23602400  | -0.68146900 | -1.45139700 |
| H    | 1.24602700  | -0.81238500 | 1.42905100  |
| H    | -4.43122900 | 0.48836100  | -0.28358900 |
| H    | -1.93933200 | 0.68485100  | 1.99290600  |
| H    | 0.34613500  | 1.47602800  | 1.62946000  |
| O    | -2.74884700 | -0.20697300 | -0.75693100 |
| O    | -4.11670700 | -0.39891000 | -0.51099400 |
| C    | -0.81854900 | -1.92807100 | -0.03414900 |
| H    | -0.55356000 | -2.71507200 | 0.68636800  |
| C    | -1.77238000 | -1.00626100 | 0.68070800  |
| H    | -2.66202100 | -1.47349200 | 1.08884100  |
| H    | -1.34399400 | -2.42522400 | -0.85291800 |



|     |             |             |             |
|-----|-------------|-------------|-------------|
| C   | 2.36646200  | 0.39477900  | 0.04837400  |
| H   | 2.21365100  | 0.88896400  | -0.91627000 |
| H   | 2.61575500  | 1.19263400  | 0.75943500  |
| H   | 1.19363100  | -2.00319000 | -0.79765200 |
| O   | -0.20354700 | 1.54341400  | -0.37109200 |
| O   | -1.40332600 | 2.34753400  | -0.28313600 |
| H   | -2.04321300 | 1.70381300  | -0.64076000 |
| C   | 3.55727600  | -0.56799300 | -0.04152700 |
| H   | 3.35321200  | -1.35052600 | -0.77997900 |
| H   | 3.68211300  | -1.08020600 | 0.92088000  |
| C   | 4.86294700  | 0.14101500  | -0.41408600 |
| H   | 5.12379500  | 0.90430400  | 0.32556500  |
| H   | 5.69687000  | -0.56365000 | -0.47330000 |
| H   | 4.77799600  | 0.63858800  | -1.38493500 |
| P38 |             |             |             |
| C   | 0.08690300  | -1.36623000 | 0.75679200  |
| C   | -0.27667800 | -0.34512500 | -0.33512700 |
| C   | 0.91171400  | 0.60644600  | -0.56554100 |
| C   | 2.22629400  | -0.12688000 | -0.68013900 |
| C   | 2.39103200  | -1.38730200 | -0.27771200 |
| C   | 1.29814200  | -2.21358900 | 0.34405900  |
| H   | -0.76292400 | -2.01842500 | 0.97292500  |
| H   | 3.35790200  | -1.86753900 | -0.40991900 |
| H   | 1.69630100  | -2.75735100 | 1.20840200  |
| H   | 3.05450400  | 0.41947900  | -1.11965600 |
| H   | -0.39183000 | -0.89029600 | -1.28288900 |
| H   | 0.31758400  | -0.82269900 | 1.67883500  |
| H   | 0.99096800  | -2.98974900 | -0.37194500 |
| H   | 0.73632900  | 1.20098300  | -1.47016500 |
| C   | -1.58766400 | 0.41589700  | -0.06850700 |
| H   | -1.64520200 | 1.26580000  | -0.75954300 |
| H   | -1.55843500 | 0.85165100  | 0.93527400  |
| O   | 0.90801700  | 1.52416000  | 0.55119700  |
| O   | 1.88850800  | 2.55832000  | 0.27994900  |
| H   | 2.59980900  | 2.29115600  | 0.87848200  |
| C   | -2.85373800 | -0.43499300 | -0.23061400 |
| H   | -2.82988600 | -1.28225800 | 0.46340700  |
| H   | -2.87188400 | -0.86716300 | -1.23899100 |
| C   | -4.13867100 | 0.36549000  | 0.00269600  |
| H   | -4.21720400 | 1.20051900  | -0.70030700 |
| H   | -5.02720100 | -0.25939800 | -0.12232000 |
| H   | -4.16502700 | 0.78315400  | 1.01379900  |

R39

|      |             |             |             |
|------|-------------|-------------|-------------|
| C    | -2.48564300 | 0.27006000  | 0.80563400  |
| C    | -1.07296700 | -0.11088300 | 1.11513500  |
| C    | 0.04156200  | 0.19207200  | 0.15827300  |
| C    | -0.11701200 | 1.61984800  | -0.41504900 |
| C    | -1.55108900 | 1.93806800  | -0.86076500 |
| C    | -2.57092500 | 1.70207500  | 0.26000300  |
| H    | -3.11244400 | 0.15065700  | 1.69568400  |
| H    | 0.19795100  | 2.31674800  | 0.37008000  |
| H    | 0.57516900  | 1.74613100  | -1.25154300 |
| H    | -1.60044200 | 2.97983400  | -1.19268000 |
| H    | -1.80988500 | 1.31352200  | -1.71792500 |
| H    | -2.39036700 | 2.39265900  | 1.09156200  |
| H    | -3.58935200 | 1.88073900  | -0.09590800 |
| C    | 1.41014700  | -0.06056400 | 0.81387100  |
| H    | 1.42383000  | -1.10619500 | 1.13852800  |
| H    | 1.46183400  | 0.54709600  | 1.72505500  |
| O    | -0.08756100 | -0.61918500 | -1.05729900 |
| O    | -0.20152700 | -2.02659200 | -0.65793300 |
| H    | -0.86053900 | -0.71620200 | 1.98810500  |
| H    | 0.24701500  | -2.43566400 | -1.40977300 |
| O    | -3.05403000 | -0.53951600 | -0.25223000 |
| O    | -2.98304600 | -1.93141800 | 0.13954800  |
| H    | -2.11804700 | -2.17483400 | -0.23749100 |
| C    | 2.63527400  | 0.21191800  | -0.06488600 |
| H    | 2.69342800  | 1.27753300  | -0.31404900 |
| H    | 2.52201900  | -0.31985700 | -1.01592800 |
| C    | 3.94880600  | -0.21277300 | 0.60331700  |
| H    | 4.05405000  | 0.31006900  | 1.56175600  |
| H    | 3.90121900  | -1.28137200 | 0.84539400  |
| C    | 5.18116800  | 0.05996000  | -0.26356400 |
| H    | 5.27851000  | 1.12653300  | -0.48898100 |
| H    | 6.09978700  | -0.25835800 | 0.23661300  |
| H    | 5.11965800  | -0.47403500 | -1.21700000 |
| TS39 |             |             |             |
| C    | 2.26896100  | 0.43580900  | -0.90011300 |
| C    | 0.84659500  | 0.15869900  | -1.26716300 |
| C    | -0.21590600 | 0.31724700  | -0.36941900 |
| C    | -0.00828900 | 1.16268300  | 0.87311400  |
| C    | 1.45480800  | 1.31968800  | 1.31812200  |
| C    | 2.40332700  | 1.54617300  | 0.13922800  |
| H    | 2.85537100  | 0.67237400  | -1.79555500 |
| H    | -0.43581900 | 2.15073800  | 0.64994400  |
| H    | -0.60180400 | 0.74850600  | 1.69014800  |
| H    | 1.52943400  | 2.15297800  | 2.02307200  |

|     |             |             |             |
|-----|-------------|-------------|-------------|
| H   | 1.76076100  | 0.42277200  | 1.85627800  |
| H   | 2.17752200  | 2.49559900  | -0.36169100 |
| H   | 3.44140200  | 1.59765200  | 0.47430700  |
| C   | -1.62286300 | 0.26325200  | -0.94525600 |
| H   | -1.65897600 | -0.56831100 | -1.65740800 |
| H   | -1.76804500 | 1.17783500  | -1.53650500 |
| O   | -0.20357300 | -1.49142600 | 0.24489800  |
| O   | 0.62119300  | -1.68327100 | 1.35251100  |
| H   | 0.65845900  | -0.33098400 | -2.21644900 |
| H   | 1.48456600  | -1.86397200 | 0.94019700  |
| O   | 2.76915900  | -0.84526100 | -0.40102500 |
| O   | 4.19925100  | -0.72419500 | -0.14812800 |
| H   | 4.54928000  | -1.22729000 | -0.89667600 |
| C   | -2.77386700 | 0.12352100  | 0.05802800  |
| H   | -2.80582200 | 0.99819500  | 0.71769800  |
| H   | -2.58577300 | -0.74598300 | 0.69328900  |
| C   | -4.13477300 | -0.02440800 | -0.63295500 |
| H   | -4.11283200 | -0.90515800 | -1.28596000 |
| H   | -4.30774300 | 0.83723000  | -1.29003500 |
| C   | -5.29752700 | -0.15281600 | 0.35501600  |
| H   | -5.37109600 | 0.73078500  | 0.99684400  |
| H   | -6.25294800 | -0.26587300 | -0.16462200 |
| H   | -5.16697100 | -1.02295400 | 1.00546800  |
| P39 |             |             |             |
| C   | -1.87871800 | -0.62386800 | 0.56487100  |
| C   | -0.40555300 | -0.43191400 | 0.32847200  |
| C   | 0.15287800  | 0.74247900  | 0.01426500  |
| C   | -0.68141900 | 1.99565700  | -0.15347600 |
| C   | -2.17472200 | 1.70589200  | -0.33423500 |
| C   | -2.64798100 | 0.68911700  | 0.70552600  |
| H   | -2.03554800 | -1.25247100 | 1.44882000  |
| H   | -0.52702800 | 2.63877300  | 0.72532500  |
| H   | -0.29934500 | 2.56903000  | -1.00608300 |
| H   | -2.75210000 | 2.63248100  | -0.26594500 |
| H   | -2.34323900 | 1.29365200  | -1.33478400 |
| H   | -2.48570600 | 1.08294500  | 1.71623200  |
| H   | -3.71677100 | 0.48005900  | 0.61565000  |
| C   | 1.63940100  | 0.93747400  | -0.18306200 |
| H   | 1.79626900  | 1.30532600  | -1.20710200 |
| H   | 1.95840100  | 1.76812200  | 0.46343500  |
| H   | 0.20010300  | -1.32602600 | 0.41926500  |
| O   | -2.32426400 | -1.39175200 | -0.57625000 |
| O   | -3.63018900 | -1.95419000 | -0.23587300 |
| H   | -4.15959000 | -1.59733500 | -0.96078600 |

|   |            |             |             |
|---|------------|-------------|-------------|
| C | 2.55097300 | -0.26726500 | 0.06151500  |
| H | 2.40750500 | -0.63535600 | 1.08427700  |
| H | 2.26308200 | -1.08835700 | -0.60515500 |
| C | 4.03418200 | 0.05646200  | -0.15436500 |
| H | 4.32587100 | 0.87856400  | 0.51052800  |
| H | 4.17895700 | 0.42659800  | -1.17659300 |
| C | 4.95341400 | -1.14399900 | 0.08708300  |
| H | 4.70932400 | -1.97088400 | -0.58732500 |
| H | 6.00281800 | -0.88238400 | -0.07470300 |
| H | 4.85789700 | -1.51540900 | 1.11237000  |

#### R40

|   |             |             |             |
|---|-------------|-------------|-------------|
| C | 2.14881600  | -2.14066700 | -0.44669800 |
| C | 0.81263500  | -1.42574200 | -0.68419900 |
| C | 2.88710100  | -0.18270700 | 0.94525500  |
| C | 3.27752900  | -1.14954800 | -0.11933300 |
| H | 0.88350000  | -0.80819400 | -1.58263800 |
| H | 0.03559300  | -2.17106100 | -0.87316100 |
| H | 2.03656400  | -2.84614800 | 0.38571000  |
| H | 2.41622200  | -2.73291700 | -1.32676500 |
| H | 0.84528600  | 1.41408500  | -1.42004600 |
| H | 3.65732200  | 0.31629200  | 1.52379000  |
| H | 3.52509700  | -0.58208500 | -1.03266500 |
| H | 4.19050600  | -1.68325900 | 0.16430400  |
| C | -0.96986100 | 0.12523100  | 0.39507200  |
| H | -1.17461600 | 0.68454600  | 1.31214700  |
| O | 1.50430100  | 1.71454100  | 0.31388800  |
| O | 1.76027300  | 1.54852500  | -1.10529000 |
| C | 0.40612900  | -0.56360800 | 0.52997200  |
| H | 0.29325400  | -1.25624400 | 1.37658400  |
| C | 1.52240500  | 0.40729300  | 0.99187200  |
| H | 1.29228900  | 0.74928800  | 2.00861300  |
| O | -0.95690200 | 1.11077500  | -0.67632400 |
| O | -1.10397400 | 2.44089800  | -0.12095800 |
| H | -0.18574300 | 2.60292600  | 0.17506500  |
| C | -2.13342700 | -0.83104400 | 0.12120100  |
| H | -2.05068800 | -1.69165600 | 0.79674100  |
| H | -2.03876900 | -1.22166100 | -0.89740700 |
| C | -3.50511900 | -0.16739800 | 0.28458500  |
| H | -3.53856900 | 0.72823700  | -0.34198200 |
| H | -3.61955700 | 0.17545700  | 1.31986500  |
| C | -4.66371500 | -1.10017900 | -0.07774400 |
| H | -4.66583000 | -1.99812800 | 0.54864600  |
| H | -5.62803600 | -0.60252400 | 0.05368800  |

|      |             |             |             |
|------|-------------|-------------|-------------|
| H    | -4.59836800 | -1.42465500 | -1.12091300 |
| TS40 |             |             |             |
| C    | -1.79359700 | -2.42586200 | 0.56566700  |
| C    | -0.61343100 | -1.48770500 | 0.85004800  |
| C    | -2.71302500 | -0.56753300 | -0.88639900 |
| C    | -3.03578400 | -1.65745700 | 0.08730400  |
| H    | -0.85780100 | -0.79479500 | 1.65977400  |
| H    | 0.24854100  | -2.07072400 | 1.18342600  |
| H    | -1.49895300 | -3.14804600 | -0.20501900 |
| H    | -2.04093800 | -3.00704100 | 1.45855700  |
| H    | -3.36411100 | 2.47414600  | -0.09346100 |
| H    | -3.53045200 | -0.13065700 | -1.45247800 |
| H    | -3.54113100 | -1.19915100 | 0.95225500  |
| H    | -3.77306500 | -2.34151300 | -0.34799500 |
| C    | 1.03672000  | 0.18573100  | -0.24950000 |
| H    | 1.08389100  | 0.91519200  | -1.06433500 |
| O    | -1.84039800 | 1.47444800  | 0.33374500  |
| O    | -2.44374400 | 2.52436900  | -0.38717800 |
| C    | -0.24520000 | -0.67545600 | -0.40405600 |
| H    | 0.00405300  | -1.39466100 | -1.20106300 |
| C    | -1.46543400 | 0.04031600  | -0.95145800 |
| H    | -1.29083100 | 0.75414000  | -1.74974900 |
| O    | 1.05602000  | 0.92330700  | 0.98018100  |
| O    | 0.69845800  | 2.30122200  | 0.73673000  |
| H    | -0.27800500 | 2.21912500  | 0.70080500  |
| C    | 2.31597200  | -0.66346300 | -0.25974900 |
| H    | 2.27284600  | -1.36036400 | -1.10567500 |
| H    | 2.34440800  | -1.27451200 | 0.64956200  |
| C    | 3.59356700  | 0.17787900  | -0.34412300 |
| H    | 3.58010700  | 0.91262900  | 0.46490700  |
| H    | 3.58801900  | 0.74814000  | -1.28087000 |
| C    | 4.86874200  | -0.66559800 | -0.26538500 |
| H    | 4.91565600  | -1.39936500 | -1.07694100 |
| H    | 5.76248600  | -0.03957500 | -0.33361000 |
| H    | 4.92139300  | -1.21484300 | 0.67998300  |
| P40  |             |             |             |
| C    | 2.73230400  | -1.49841500 | -0.43014100 |
| C    | 1.25330100  | -1.12784000 | -0.59444300 |
| C    | 0.74900300  | -0.30522900 | 0.60794700  |
| C    | 1.75075900  | 0.76126000  | 0.99439800  |
| C    | 3.01360200  | 0.79424100  | 0.57125600  |
| C    | 3.61332900  | -0.24521200 | -0.33984600 |
| H    | 0.65073200  | -2.03255900 | -0.71191600 |
| H    | 3.05836900  | -2.13098200 | -1.26124800 |

|     |             |             |             |
|-----|-------------|-------------|-------------|
| H   | 3.66095200  | 1.60696700  | 0.89128000  |
| H   | 4.61684100  | -0.51046700 | 0.01237500  |
| C   | -0.65156000 | 0.31219300  | 0.39037000  |
| H   | 1.39481100  | 1.53834600  | 1.66787300  |
| H   | -0.87438000 | 0.96424300  | 1.24290300  |
| H   | 0.63179300  | -0.98330600 | 1.46700000  |
| H   | 1.12549300  | -0.53651900 | -1.50669200 |
| H   | 2.85644800  | -2.09121600 | 0.48425600  |
| H   | 3.75718900  | 0.18887300  | -1.33926900 |
| O   | -0.53294800 | 1.15871000  | -0.77013000 |
| O   | -1.45875100 | 2.27218900  | -0.63867800 |
| H   | -0.82762400 | 3.00385800  | -0.59973900 |
| C   | -1.77034700 | -0.71987800 | 0.22395200  |
| H   | -1.69278400 | -1.44060300 | 1.04883000  |
| H   | -1.59414200 | -1.28059400 | -0.70015900 |
| C   | -3.18809500 | -0.13525000 | 0.19929500  |
| H   | -3.26864700 | 0.58474300  | -0.61834300 |
| H   | -3.36208600 | 0.43180500  | 1.12155800  |
| C   | -4.26411200 | -1.21479000 | 0.05051100  |
| H   | -4.22675800 | -1.93349800 | 0.87580100  |
| H   | -5.26609600 | -0.77735100 | 0.03701400  |
| H   | -4.13563500 | -1.77541200 | -0.88086100 |
| R41 |             |             |             |
| C   | 0.99862300  | -1.81141800 | -0.22638900 |
| C   | 2.49373500  | -1.49188300 | -0.09718000 |
| C   | 0.63944400  | 0.53746700  | -0.97570900 |
| C   | 0.08825300  | -0.56797100 | -0.12770400 |
| H   | 2.71014700  | -1.13404200 | 0.91257400  |
| H   | 3.07500800  | -2.40742300 | -0.24316600 |
| H   | 0.80472500  | -2.28436800 | -1.19589200 |
| H   | 0.68414300  | -2.52747500 | 0.53787800  |
| H   | 1.01242600  | 1.96415900  | 1.23395800  |
| H   | -0.03540200 | 1.14871600  | -1.56018300 |
| O   | 2.54293900  | 1.39926300  | 0.30762000  |
| O   | 1.65360000  | 2.46919500  | 0.70550000  |
| C   | 2.94329900  | -0.42351400 | -1.10310100 |
| H   | 2.83578000  | -0.79234600 | -2.12910500 |
| C   | 2.10128400  | 0.85397600  | -0.95939000 |
| H   | 2.33786900  | 1.57702700  | -1.74712700 |
| H   | 3.99673900  | -0.16796700 | -0.95770100 |
| C   | -1.37098200 | -0.91900600 | -0.46246600 |
| H   | -1.40695100 | -1.20125200 | -1.52153300 |
| O   | 0.16663400  | 0.01132200  | 1.22502200  |

|      |             |             |             |
|------|-------------|-------------|-------------|
| O    | -0.34689500 | -0.93587400 | 2.20750500  |
| H    | 0.47055500  | -1.16563700 | 2.67031200  |
| C    | -2.39698600 | 0.18301600  | -0.17721000 |
| H    | -2.13490600 | 1.09881500  | -0.72041400 |
| H    | -2.36028000 | 0.43693800  | 0.88595600  |
| H    | -1.64117600 | -1.81266900 | 0.10833900  |
| C    | -3.82463400 | -0.22912900 | -0.55667200 |
| H    | -4.09036100 | -1.14558900 | -0.01612500 |
| H    | -3.86009700 | -0.48418100 | -1.62312600 |
| C    | -4.86215300 | 0.85661700  | -0.25775600 |
| H    | -4.64453200 | 1.77544300  | -0.81132000 |
| H    | -5.86951900 | 0.53351300  | -0.53417500 |
| H    | -4.87368300 | 1.10816500  | 0.80713400  |
| TS41 |             |             |             |
| C    | -0.07729700 | 1.69607000  | -0.25680400 |
| C    | 1.31847900  | 2.05236300  | -0.78815800 |
| C    | 0.98479700  | -0.15412100 | 1.04871300  |
| C    | -0.16735400 | 0.21198900  | 0.14571700  |
| H    | 1.50059000  | 1.48051200  | -1.70017300 |
| H    | 1.35364100  | 3.11136000  | -1.05981700 |
| H    | -0.32811500 | 2.30484700  | 0.61969700  |
| H    | -0.83035200 | 1.90355400  | -1.02040800 |
| H    | 3.55804700  | -2.44881400 | 0.33811100  |
| H    | 0.84940400  | -0.99276600 | 1.72279600  |
| O    | 2.99237200  | -0.80042000 | -0.37040400 |
| O    | 3.96728300  | -1.57305000 | 0.27942900  |
| C    | 2.42111700  | 1.74632300  | 0.23249800  |
| H    | 2.41333100  | 2.50312000  | 1.03012900  |
| C    | 2.24817900  | 0.41139400  | 0.90898500  |
| H    | 2.99552700  | 0.15889700  | 1.65345800  |
| C    | -1.49924000 | -0.19805800 | 0.79295700  |
| H    | -1.44525200 | -1.27912400 | 0.96376100  |
| H    | -1.56365300 | 0.27286500  | 1.78231400  |
| H    | 3.41039900  | 1.79211900  | -0.22834700 |
| O    | -0.01997200 | -0.45715700 | -1.14745400 |
| O    | 0.33997100  | -1.84697300 | -0.95845800 |
| H    | 1.31130100  | -1.75206200 | -0.94607100 |
| C    | -2.75602400 | 0.11897900  | -0.02357000 |
| H    | -2.88758900 | 1.20394600  | -0.11002900 |
| H    | -2.62102600 | -0.26282800 | -1.04048700 |
| C    | -4.02599400 | -0.48613000 | 0.58700400  |
| H    | -4.14676800 | -0.12120000 | 1.61467400  |
| H    | -3.90469900 | -1.57326400 | 0.66279800  |
| C    | -5.28938400 | -0.16915600 | -0.21793700 |

|     |             |             |             |
|-----|-------------|-------------|-------------|
| H   | -6.17616100 | -0.61938200 | 0.23631600  |
| H   | -5.45956900 | 0.91027800  | -0.27917900 |
| H   | -5.20996400 | -0.54918900 | -1.24088600 |
| P41 |             |             |             |
| C   | -2.37449600 | -1.20292200 | -0.97837800 |
| C   | -0.89640600 | -1.16803900 | -0.57589500 |
| C   | -0.49866700 | 0.17226800  | 0.06581900  |
| C   | -1.56692200 | 0.65729700  | 1.02616900  |
| C   | -2.78937900 | 0.13144600  | 1.11165400  |
| C   | -3.28428700 | -0.98735200 | 0.23579700  |
| H   | -0.25958800 | -1.34409000 | -1.44569300 |
| H   | -2.60926000 | -2.15374400 | -1.46558300 |
| H   | -3.47801900 | 0.51295700  | 1.86215700  |
| H   | -4.31071300 | -0.77743500 | -0.08537300 |
| C   | 0.86418600  | 0.12243700  | 0.78104600  |
| H   | -1.27849400 | 1.46294300  | 1.69443000  |
| H   | 1.06861200  | 1.13001400  | 1.15677500  |
| H   | 0.76098500  | -0.52473300 | 1.66054100  |
| H   | -0.68408100 | -1.96409500 | 0.14689300  |
| H   | -2.55578100 | -0.41264500 | -1.71257300 |
| H   | -3.34764700 | -1.90699900 | 0.83561400  |
| O   | -0.41309000 | 1.05518400  | -1.09545300 |
| O   | -0.15743300 | 2.41385200  | -0.65641200 |
| H   | -1.05125000 | 2.78269700  | -0.68714000 |
| C   | 2.04481200  | -0.33997000 | -0.07968600 |
| H   | 1.90394400  | -1.38261300 | -0.38794700 |
| H   | 2.06884300  | 0.25612900  | -0.99743600 |
| C   | 3.38952700  | -0.21613300 | 0.64698500  |
| H   | 3.54082700  | 0.82769400  | 0.94681300  |
| H   | 3.35696400  | -0.79781400 | 1.57671400  |
| C   | 4.57671400  | -0.67930500 | -0.20209200 |
| H   | 5.52123500  | -0.57277400 | 0.33861400  |
| H   | 4.47389400  | -1.73139900 | -0.48634800 |
| H   | 4.65322900  | -0.09474500 | -1.12405600 |
| R42 |             |             |             |
| C   | 0.01430300  | 1.79928800  | 0.00470900  |
| C   | 0.08613700  | 0.27926100  | 0.23068200  |
| C   | -2.51862600 | 1.59418600  | 0.03865600  |
| C   | -1.33396800 | 2.23508100  | -0.59904900 |
| H   | 0.17388100  | 2.28888700  | 0.97125700  |
| H   | 0.82376300  | 2.11593900  | -0.65539700 |
| H   | -4.20667300 | -1.98128700 | 0.09014300  |
| H   | -3.50164600 | 2.02299200  | -0.12539200 |



|      |             |             |             |
|------|-------------|-------------|-------------|
| H    | -1.33123400 | 1.97929900  | -1.67012300 |
| H    | -1.42951000 | 3.32610600  | -0.55707300 |
| O    | -2.91612900 | -0.68680800 | -0.39818900 |
| O    | -3.25292300 | -1.96111000 | 0.24809100  |
| C    | -1.06841700 | -0.15125400 | 1.15595900  |
| H    | -0.91231100 | 0.32241600  | 2.13088600  |
| C    | -2.45615100 | 0.23982700  | 0.64896900  |
| H    | -3.18951700 | 0.14689400  | 1.45762600  |
| C    | 1.42867200  | -0.20161200 | 0.80903200  |
| H    | 1.53424000  | 0.19604200  | 1.82609900  |
| H    | 1.35881800  | -1.29005600 | 0.90437700  |
| H    | -1.04112600 | -1.22929200 | 1.32049700  |
| O    | -0.09352100 | -0.23283100 | -1.11097400 |
| O    | -0.29530800 | -1.66551000 | -1.08092000 |
| H    | -1.26807200 | -1.68872500 | -1.09450400 |
| C    | 2.67014100  | 0.14505100  | -0.02011300 |
| H    | 2.83129300  | 1.22961600  | -0.02979300 |
| H    | 2.49556600  | -0.15467500 | -1.05822200 |
| C    | 3.94005400  | -0.53668700 | 0.50356500  |
| H    | 4.10077200  | -0.25444800 | 1.55167900  |
| H    | 3.79074600  | -1.62288500 | 0.50075800  |
| C    | 5.18835200  | -0.19190000 | -0.31351200 |
| H    | 5.38704200  | 0.88452000  | -0.29851600 |
| H    | 6.07520400  | -0.69813600 | 0.07770300  |
| H    | 5.06882000  | -0.49059100 | -1.35945400 |
| TS42 |             |             |             |
| C    | 0.06435600  | 1.79353200  | -0.13537800 |
| C    | 0.13828000  | 0.30590300  | 0.25196400  |
| C    | -2.46004700 | 1.60713600  | 0.01362300  |
| C    | -1.30028100 | 2.17390400  | -0.73731100 |
| H    | 0.25590900  | 2.38473200  | 0.76640200  |
| H    | 0.85479400  | 2.02917100  | -0.85005300 |
| H    | -4.63498900 | -1.51158600 | -0.24093700 |
| H    | -3.44326700 | 2.03262900  | -0.16099000 |
| H    | -1.35143700 | 1.80646700  | -1.77224100 |
| H    | -1.39451500 | 3.26366500  | -0.80425000 |
| O    | -2.87538300 | -0.91526700 | -0.46854700 |
| O    | -3.79743000 | -1.76474600 | 0.17296500  |
| C    | -0.99631200 | -0.02203200 | 1.24167900  |
| H    | -0.76199800 | 0.45404000  | 2.20230000  |
| C    | -2.35100200 | 0.46271900  | 0.79390300  |
| H    | -3.18368900 | 0.20278700  | 1.43752400  |
| H    | -1.02678200 | -1.09567600 | 1.42975900  |
| C    | 1.49395800  | -0.11515300 | 0.84644700  |

|     |             |             |             |
|-----|-------------|-------------|-------------|
| H   | 1.41783600  | -1.18071900 | 1.08592100  |
| H   | 1.63816600  | 0.41182800  | 1.79788100  |
| O   | -0.07974800 | -0.34815400 | -1.01823600 |
| O   | -0.26403800 | -1.77156500 | -0.82859100 |
| H   | -1.24190400 | -1.79018600 | -0.78082600 |
| C   | 2.70915800  | 0.10208100  | -0.06176800 |
| H   | 2.87644300  | 1.17352500  | -0.22458800 |
| H   | 2.49792300  | -0.33421300 | -1.04286500 |
| C   | 3.99170300  | -0.51524500 | 0.50894300  |
| H   | 3.83558600  | -1.58994000 | 0.65982800  |
| H   | 4.18997600  | -0.09411600 | 1.50262900  |
| C   | 5.21344200  | -0.29914800 | -0.38851300 |
| H   | 5.41925200  | 0.76686100  | -0.52780600 |
| H   | 6.10982000  | -0.75673700 | 0.03894900  |
| H   | 5.05614400  | -0.73685500 | -1.37889800 |
| P42 |             |             |             |
| C   | 1.56960700  | -1.38775300 | -0.42333100 |
| C   | 0.52279100  | -0.28950000 | -0.14557900 |
| C   | 0.84820400  | 0.41449700  | 1.18096800  |
| C   | 2.31839900  | 0.68242200  | 1.38173900  |
| C   | 3.28028000  | 0.12781400  | 0.64584300  |
| C   | 3.00442200  | -0.84503600 | -0.46824600 |
| H   | 1.32233600  | -1.89210300 | -1.36156700 |
| H   | 4.31893900  | 0.38370400  | 0.83842200  |
| H   | 3.71260600  | -1.67989100 | -0.41486200 |
| H   | 2.58260400  | 1.37141000  | 2.18002900  |
| H   | 0.46719100  | -0.20196000 | 2.00565700  |
| H   | 1.47968400  | -2.12977200 | 0.37640700  |
| H   | 3.18871600  | -0.35513900 | -1.43130700 |
| H   | 0.28668400  | 1.35011500  | 1.23205000  |
| C   | -0.89418800 | -0.89091100 | -0.18426800 |
| H   | -1.03614600 | -1.30222300 | -1.18994800 |
| H   | -0.90845900 | -1.74551900 | 0.50489200  |
| O   | 0.74038900  | 0.59218900  | -1.28142100 |
| O   | 0.04650200  | 1.85759200  | -1.11619000 |
| H   | 0.80162100  | 2.44804600  | -0.98820900 |
| C   | -2.07349900 | 0.03263700  | 0.15072600  |
| H   | -1.95734500 | 0.43980100  | 1.16215500  |
| H   | -2.07365500 | 0.88891400  | -0.52750700 |
| C   | -3.42156400 | -0.69399000 | 0.06293700  |
| H   | -3.54434600 | -1.10423100 | -0.94679500 |
| H   | -3.41723400 | -1.55598800 | 0.74193800  |
| C   | -4.61369300 | 0.20866400  | 0.39302800  |
| H   | -4.66351000 | 1.06124200  | -0.29120800 |

|      |             |             |             |
|------|-------------|-------------|-------------|
| H    | -5.56003500 | -0.33413000 | 0.31765000  |
| H    | -4.53933700 | 0.60641100  | 1.41018700  |
| R43  |             |             |             |
| C    | -0.53814700 | -0.22319500 | 0.57061900  |
| C    | 0.65830900  | 0.71199500  | 0.82688600  |
| C    | 1.15037400  | -2.01627400 | -0.06723500 |
| C    | -0.14246600 | -1.35497500 | -0.41044900 |
| H    | -0.75801300 | -0.68654200 | 1.54222300  |
| H    | 4.65774000  | -0.13752300 | -1.17339500 |
| H    | 1.32093400  | -3.04873100 | -0.35008700 |
| H    | -0.06378700 | -0.91629900 | -1.41853500 |
| H    | -0.93729500 | -2.10365500 | -0.46398500 |
| O    | 2.88348500  | -0.71308700 | -0.85443500 |
| O    | 4.01395200  | 0.18233800  | -0.52770900 |
| C    | 1.88598400  | -0.05973500 | 1.32163800  |
| H    | 1.64661300  | -0.49368900 | 2.29867100  |
| C    | 2.31167000  | -1.20100500 | 0.39208600  |
| H    | 3.06999100  | -1.82240000 | 0.88234800  |
| H    | 2.72103400  | 0.62288200  | 1.47803200  |
| H    | 0.38227800  | 1.46294000  | 1.57905900  |
| C    | -1.78912600 | 0.55243100  | 0.12272400  |
| H    | -1.92843100 | 1.39723300  | 0.80875000  |
| H    | -1.60550200 | 0.99263400  | -0.86219500 |
| O    | 0.88928000  | 1.38160700  | -0.41804800 |
| O    | 1.99692000  | 2.30001500  | -0.26315200 |
| H    | 2.73691900  | 1.75329500  | -0.58318800 |
| C    | -3.08022100 | -0.27482500 | 0.09379300  |
| H    | -2.99378100 | -1.08581900 | -0.63890600 |
| H    | -3.22663900 | -0.75841000 | 1.06925600  |
| C    | -4.32064000 | 0.56155900  | -0.24307800 |
| H    | -4.42246800 | 1.36706200  | 0.49406600  |
| H    | -4.16936400 | 1.05432300  | -1.21085000 |
| C    | -5.61236600 | -0.25962200 | -0.28396600 |
| H    | -5.80776300 | -0.73884500 | 0.68066500  |
| H    | -6.47624200 | 0.36628400  | -0.52396100 |
| H    | -5.55554300 | -1.04985600 | -1.03930800 |
| TS43 |             |             |             |
| C    | -0.61410100 | -0.13596200 | 0.61476400  |
| C    | 0.54550200  | 0.85409500  | 0.83152700  |
| C    | 1.20487500  | -1.80816100 | -0.01837800 |
| C    | -0.16041600 | -1.27796000 | -0.32255000 |
| H    | -0.82237300 | -0.57147800 | 1.60154000  |
| H    | 4.71248100  | -1.17298800 | -1.27845500 |

|     |             |             |             |
|-----|-------------|-------------|-------------|
| H   | 1.48285400  | -2.76717600 | -0.44468600 |
| H   | -0.16479100 | -0.91199400 | -1.36055000 |
| H   | -0.88170900 | -2.10133500 | -0.29625300 |
| O   | 3.14286700  | -0.26438200 | -0.81710600 |
| O   | 4.51633900  | -0.49707500 | -0.61395400 |
| C   | 1.76391100  | 0.15111800  | 1.43863800  |
| H   | 1.50851000  | -0.15559900 | 2.46134900  |
| C   | 2.17128600  | -1.06767300 | 0.65221700  |
| H   | 3.06751700  | -1.57862500 | 0.98463600  |
| H   | 2.59901800  | 0.84624400  | 1.52261300  |
| C   | -1.89205800 | 0.56896300  | 0.12847900  |
| H   | -2.09309700 | 1.41113100  | 0.80225200  |
| H   | -1.70493700 | 1.00797400  | -0.85654200 |
| H   | 0.23076100  | 1.67192900  | 1.49244700  |
| O   | 0.80946500  | 1.38205400  | -0.47248500 |
| O   | 1.97267300  | 2.23987300  | -0.42944200 |
| H   | 2.65236400  | 1.58374900  | -0.68377200 |
| C   | -3.13632100 | -0.32594600 | 0.07467200  |
| H   | -2.98661900 | -1.13825300 | -0.64638800 |
| H   | -3.28325200 | -0.80717100 | 1.05126500  |
| C   | -4.41000200 | 0.43902500  | -0.30502700 |
| H   | -4.57552300 | 1.24488500  | 0.42004100  |
| H   | -4.25847900 | 0.92968500  | -1.27379300 |
| C   | -5.65384400 | -0.45141400 | -0.37188000 |
| H   | -5.85004000 | -0.93090000 | 0.59240200  |
| H   | -6.54302700 | 0.12437300  | -0.64256900 |
| H   | -5.53339900 | -1.24472500 | -1.11640300 |
| P43 |             |             |             |
| C   | 1.38797400  | 0.57947800  | 0.60321000  |
| C   | 0.14317600  | -0.30109500 | 0.39446700  |
| C   | 0.40967400  | -1.34988000 | -0.70370000 |
| C   | 1.76112400  | -2.00257400 | -0.57357300 |
| C   | 2.74156200  | -1.51876300 | 0.18696500  |
| C   | 2.61504800  | -0.25047700 | 0.99032500  |
| H   | 1.18669300  | 1.33590900  | 1.37027300  |
| H   | 3.68944700  | -2.04743900 | 0.24381600  |
| H   | 3.50687600  | 0.37317400  | 0.87468000  |
| H   | 1.92506200  | -2.91368500 | -1.14320300 |
| H   | 0.32524200  | -0.87929600 | -1.69231400 |
| H   | 0.01594500  | -0.84150500 | 1.34260100  |
| H   | 2.56218900  | -0.48517400 | 2.06219200  |
| H   | -0.36713700 | -2.12075000 | -0.67193400 |
| C   | -1.12287000 | 0.53710200  | 0.14896300  |
| H   | -1.18503400 | 1.30306400  | 0.93238900  |

|     |             |             |             |
|-----|-------------|-------------|-------------|
| H   | -1.01565800 | 1.07941600  | -0.79584900 |
| O   | 1.57325600  | 1.26287400  | -0.64643600 |
| O   | 2.57900500  | 2.29432800  | -0.44975400 |
| H   | 3.24365000  | 2.00677500  | -1.08986500 |
| C   | -2.42958900 | -0.26558500 | 0.14270800  |
| H   | -2.42058800 | -0.99334700 | -0.67703300 |
| H   | -2.50381100 | -0.85040800 | 1.06962400  |
| C   | -3.67602700 | 0.61691600  | 0.00446300  |
| H   | -3.69935600 | 1.33935100  | 0.82926400  |
| H   | -3.59622600 | 1.20947800  | -0.91477800 |
| C   | -4.98350000 | -0.17988100 | -0.01332600 |
| H   | -5.10743000 | -0.75787300 | 0.90793100  |
| H   | -5.85130200 | 0.47811600  | -0.11097700 |
| H   | -5.00607500 | -0.88486900 | -0.85031800 |
| R44 |             |             |             |
| C   | 0.49565100  | -0.23427400 | 0.54640000  |
| C   | 0.05203300  | -1.31972100 | -0.45446600 |
| C   | -1.90722700 | -0.07104000 | 1.25849500  |
| C   | -0.69066200 | 0.70588600  | 0.87829400  |
| H   | -0.18820100 | -0.84814300 | -1.41058600 |
| H   | 0.73167200  | -0.72643700 | 1.50052900  |
| H   | -3.45915000 | 1.00522300  | -0.62547600 |
| H   | -2.50066800 | 0.23948400  | 2.10853500  |
| H   | -0.41040500 | 1.40526900  | 1.67407100  |
| O   | -2.85358900 | -0.76432500 | -0.88367400 |
| O   | -3.94446100 | 0.16079800  | -0.65761500 |
| C   | -1.16492700 | -2.11670500 | 0.03911300  |
| H   | -0.90080100 | -2.69418300 | 0.93206800  |
| C   | -2.35191500 | -1.20986000 | 0.39858800  |
| H   | -3.14437200 | -1.77982100 | 0.89480300  |
| H   | -1.49112200 | -2.83071000 | -0.72261800 |
| H   | 0.87969300  | -2.01128200 | -0.63381800 |
| C   | 1.74442100  | 0.54967400  | 0.10110400  |
| H   | 1.87193900  | 1.41005600  | 0.77039000  |
| H   | 1.57469100  | 0.96548300  | -0.89734200 |
| O   | -0.88657600 | 1.47509100  | -0.33539800 |
| O   | -2.05925000 | 2.32679100  | -0.11887600 |
| H   | -1.80262100 | 3.08191700  | -0.66511400 |
| C   | 3.04090800  | -0.27014200 | 0.10704700  |
| H   | 2.95828800  | -1.11132900 | -0.59058300 |
| H   | 3.18749600  | -0.71108700 | 1.10210100  |
| C   | 4.27718100  | 0.55850400  | -0.26239700 |
| H   | 4.37087100  | 1.39779700  | 0.43739900  |

|      |             |             |             |
|------|-------------|-------------|-------------|
| H    | 4.12804800  | 1.00465000  | -1.25297200 |
| C    | 5.57410200  | -0.25556700 | -0.25930500 |
| H    | 5.52529700  | -1.08055800 | -0.97686400 |
| H    | 6.43502200  | 0.36394400  | -0.52477100 |
| H    | 5.76794100  | -0.68762500 | 0.72750700  |
| TS44 |             |             |             |
| C    | 0.59533500  | -0.14672400 | 0.55573000  |
| C    | 0.08623600  | -1.17995000 | -0.46872700 |
| C    | -1.79518700 | 0.15406100  | 1.28662400  |
| C    | -0.53785800 | 0.85565800  | 0.85749900  |
| H    | -0.14008700 | -0.65948700 | -1.40237000 |
| H    | 0.79792300  | -0.66294400 | 1.50520600  |
| H    | -4.89482900 | 0.28302500  | -0.38542600 |
| H    | -2.47713200 | 0.67266000  | 1.94979000  |
| H    | -0.22860600 | 1.57753100  | 1.62265000  |
| O    | -3.16430400 | -0.32901000 | -0.79614700 |
| O    | -4.52588200 | -0.59063400 | -0.58159200 |
| C    | -1.16503800 | -1.92487900 | 0.02022400  |
| H    | -0.87793800 | -2.67847700 | 0.76748500  |
| C    | -2.18542300 | -1.03862100 | 0.68637200  |
| H    | -3.05947300 | -1.54303500 | 1.08379500  |
| H    | -1.64117500 | -2.46971400 | -0.79836700 |
| C    | 1.88762800  | 0.56914500  | 0.12167600  |
| H    | 1.73175800  | 1.03265200  | -0.85744600 |
| H    | 2.07489800  | 1.39483600  | 0.81973500  |
| H    | 0.86830200  | -1.91062900 | -0.68877500 |
| O    | -0.72832200 | 1.56482600  | -0.39203500 |
| O    | -1.97116800 | 2.30495900  | -0.35505900 |
| H    | -2.56624700 | 1.61887700  | -0.71133100 |
| C    | 3.12961500  | -0.32979400 | 0.08311300  |
| H    | 2.99070600  | -1.13555300 | -0.64698400 |
| H    | 3.25569700  | -0.81918400 | 1.05835300  |
| C    | 4.41278300  | 0.43430000  | -0.26515400 |
| H    | 4.56444900  | 1.23643000  | 0.46713800  |
| H    | 4.28370100  | 0.92977700  | -1.23472300 |
| C    | 5.65586600  | -0.45868100 | -0.30902300 |
| H    | 5.54968500  | -1.24855200 | -1.05929300 |
| H    | 6.55195200  | 0.11626300  | -0.55798500 |
| H    | 5.83008500  | -0.94269300 | 0.65721200  |
| P44  |             |             |             |
| C    | -0.50110900 | 1.34108700  | 0.76944900  |
| C    | -0.17809700 | 0.30446700  | -0.32066600 |
| C    | -1.41209900 | -0.58250800 | -0.56865000 |
| C    | -2.68458100 | 0.21951400  | -0.69758000 |

|   |             |             |             |
|---|-------------|-------------|-------------|
| C | -2.78757500 | 1.48606600  | -0.29386700 |
| C | -1.66051300 | 2.25209400  | 0.34384000  |
| H | 0.37917500  | 1.94701500  | 0.99793400  |
| H | -3.72598200 | 2.01700500  | -0.43684000 |
| H | -2.04031800 | 2.81438300  | 1.20458800  |
| H | -3.53489400 | -0.28139400 | -1.14889300 |
| H | -0.02246100 | 0.84483000  | -1.26534200 |
| H | -0.77188700 | 0.80860700  | 1.68703800  |
| H | -1.30364600 | 3.01238700  | -0.36611200 |
| H | -1.25687700 | -1.18334900 | -1.47280700 |
| C | 1.08741600  | -0.52553600 | -0.03970400 |
| H | 1.10824400  | -1.37498500 | -0.73320000 |
| H | 1.02100800  | -0.96197400 | 0.96186600  |
| O | -1.47110100 | -1.50179500 | 0.54516800  |
| O | -2.50111000 | -2.48220200 | 0.25822800  |
| H | -3.20530700 | -2.17885100 | 0.84784800  |
| C | 2.39785900  | 0.25848900  | -0.18230000 |
| H | 2.41184000  | 1.10355800  | 0.51629700  |
| H | 2.45285900  | 0.69451800  | -1.18882500 |
| C | 3.64355100  | -0.60210900 | 0.06049500  |
| H | 3.63962700  | -1.44676300 | -0.63892100 |
| H | 3.58764600  | -1.04019600 | 1.06416700  |
| C | 4.95469700  | 0.17533000  | -0.08526700 |
| H | 5.00437200  | 1.00502400  | 0.62700700  |
| H | 5.82187300  | -0.46645400 | 0.09281600  |
| H | 5.05513000  | 0.59724500  | -1.09029100 |
